# Supplementary material for: Deep genetic divergence between austral populations of the red alga Gigartina skottsbergii reveals a cryptic species endemic to the Antarctic continent
Source: Springer Nature journal article supplement (doi:10.1007/s00300-015-1762-4), 2015-07-31
Supplement: 300_2015_1762_MOESM1_ESM.pdf [file 300_2015_1762_MOESM1_ESM.pdf]

Online Resource 1: Sequence alignment of the Cox2-3 sequences obtained for *Gigartina skottsbergii* and the outgroup species. The codes for each sampling site are the same as in Table 1.

>*S.\_crispata\_EST41(2)*

AGGTGTATATTATGGGCAATGCAGCGAAATTTGTGGTATAAATCATGGTTTTATGCCAATTGTAGTTGAA  
GCCACTTCTTTACCAAATTATGTTTCATGAATCTCCAATAAATTAATGAGTAATCATGAGAATTTTCGTT  
GTTTCAGTTAATGTTAATAATCACTTTATTTTAAATGTTATTTTCGATTAAACTCTAAAAATTTGTTGGGT  
TATTTTCAATCGAATTTTCAGCTCTTTAAAAAGAAGAATAAAAAATTTCTTCCCAAAAAAATAA-  
GTTGATAATTAATGTCGTTAAAATGTCTACCTTATCTAAAATTTCTAAATCTGTTCAAAGACATCCTTT  
CCAnnn

>*S.\_crispata\_EST13(2)*

AGGTGTATATTATGGGCAATGCAGCGAAATTTGTGGTATAAATCATGGTTTTATGCCAATTGTAGTTGAA  
GCCACTTCTTTACCAAATTATGTTTCATGAATCTCCAATAAATTAATGAGTAATCATGAGAATTTTCGTT  
GTTTCAGTTAATGTTAATAATCACTTTATTTTAAATGTTATTTTCGATTAAACTCTAAAAATTTGTTGGGT  
TATTTTCAATCGAATTTTCAGCTCTTTAAAAAGAAGAATAAAAAATTTCTTCCCAAAAAAATAA-  
GTTGATAATTAATGTCGTTAAAATGTCTACCTTATCTAAAATTTCTAAATCTGTTCAAAGACATCCTTT  
CCAnnn

>*Iridaea\_cordata\_HAN18*

AGGTGTATACTATGGACAATGCAGTGAAATTTGTGGTATAAATCACGGTTTCATGCCAATCGTAGTTGAA  
GCCACTTCGTTACCAAATTATGTTTCATGAATTTCTAATAAATTAACGAATAGCTATGAAAATTTTCGTT  
ATTTCAATTAGCACTAATAAATAATTTTATTTTTGTATTATTTTCGACTAAATCCGCAAATCATGACAAAT  
TGTTTTCAATCACTCAACCAACTTTTTAA-----AAAAAAAAA-  
GTTGATAATTAACGTTATCAAAATGACTACTTTATCTCAAATCTCTAAATCGGTTCAAAGACATCCTTT  
CCATCT

>PAG33

AGGTGTATATTACGGTCAATGTAGTGAAATTTGTGGTATCAATCATGGTTTTATGCCAATTGTAGTTGAA  
GCTACTTCTTTACCAAATTATGTTTCCTGAATTTCTAATAAATTAATGAATAATTATGAAAATTTTCGTT  
ATTTCAATTATTATTATTAATAGTTTTATTAATAGTTTTATTTCAATTAACCTCGTCAAAATGTAGTGGAT  
TATTTCCAATCTACCTATCAACTTTTGAAGAAAACATAAAAAACTTCTTCTGTAAAAAATAA-  
GTTGATAATTAATATTATTACAATGACTACCCTATCAAAAATTTCTAAATCTATTCAAAGACATCCTTT  
CCATCT

>PAG45

AGGTGTATATTACGGTCAATGTAGTGAAATTTGTGGTATCAATCATGGGTTTTATGCCAATTGTAGTTGAA  
GCTACTTCTTTACCAAATTATGTTTCCTGAATTTCTAATAAATTAATGAATAATTATGAAAATTTTCGTT  
ATTTCAATTATTATTATTAATAGTTTTATTAATAGTTTTATTTCAATTAACCTCGTCAAAATGTAGTGGAT  
TATTTCCAATCTACCTATCAACTTTTGAAGAAAACATAAAAAACTTCTTCTGTAAAAAATAA-  
GTTGATAATTAATATTATTACAATGACTACCCTATCAAAAATTTCTAAATCTATTCAAAGACATCCTTT  
CCATCT

>PAG58

AGGTGTATATTACGGTCAATGTAGTGAAATTTGTGGTATCAATCATGGTTTTATGCCAATTGTAGTTGAA  
GCTACTTCTTTACCAAATTATGTTTCCTGAATTTCTAATAAATTAATGAATAATTATGAAAATTTTCGTT  
ATTTCAATTATTATTATTAATACTTTTTATTAATACTTTTATTTCAATTAACCTCGTCAAAATGTAGTGGAT  
TATTTCCAATCTACCTATCAACTTTTGAAGAAAACATAAAAAACTTCTTCTGTAAAAAATAA-  
GTTGATAATTAATATTATTACAATGACTACCCTATCAAAAATTTCTAAATCTATTCAAAGACATCCTTT  
CCATCT

>PAG37

AGGTGTATATTACGGTCAATGTAGTGAAATTTGTGGTATCAATCATGGTTTTATGCCAATTGTAGTTGAA  
GCTACTTCTTTACCAAATTATGTTTCCTGAATTTCTAATAAATTAATGAATAATTATGAAAATTTTCGTT

ATTTCAATTATTATTATTAATAGTTTTATTAATAGTTTTATTTCAATTAACCTCGTCAAAAATGTAGTGGAT  
TATTTCCAATCTACCTATCAACTTTTGAAGAAAACATAAAAAACTTCTTCTGTAAAAA-  
GTTGATAATTAATATTATTACAATGACTACCCTATCAAAAATTTCTAAATCTATTCAAAGACATCCTTT  
CCATCT

>PAG5

AGGTGTATATTACGGTCAATGTAGTGAAATTTGTGGTATCAATCATGGTTTTATGCCAATTGTAGTTGAA  
GCTACTTCTTTACCAAATTATGTTTCTTGAATTTCTAATAAATTAATGAATAATTATGAAAATTTGTT  
ATTTCAATTATTATTATTAATACTTTTATTAATAGTTTTATTTCAATTAACCTCGTCAAAAATGTAGTGGAT  
TATTTCCAATCTACCTATCAACTTTTGAAGAAAACATAAAAAACTTCTTCTGTAAAAA-  
GTTGATAATTAATATTATTACAATGACTACCCTATCAAAAATTTCTAAATCTATTCAAAGACATCCTTT  
CCATCT

>PAG66

AGGTGTATATTACGGTCAATGTAGTGAAATTTGTGGTATCAATCATGGGTTTATGCCAATTGTAGTTGAA  
GCTACTTCTTTACCAAATTATGTTTCTTGAATTTCTAATAAATTAATGAATAATTATGAAAATTTGTT  
ATTTCAATTATTATTATTAATAGTTTTATTAATAGTTTTATTTCAATTAACCTCGTCAAAAATGTAGTGGAT  
TATTTCCAATCTACCTATCAACTTTTGAAGAAAACATAAAAAACTTCTTCTGTAAAAA-  
GTTGATAATTAATATTATTACAATGACTACCCTATCAAAAATTTCTAAATCTATTCAAAGACATCCTTT  
CCATCT

>PAG14

AGGTGTATATTACGGTCAATGTAGTGAAATTTGTGGTATCAATCATGGTTTTATGCCAATTGTAGTTGAA  
GCTACTTCTTTACCAAATTATGTTTCTTGAATTTCTAATAAATTAATGAATAATTATGAAAATTTGTT  
ATTTCAATTATTATTATTAATAGTTTTATTAATAGTTTTATTTCAATTAACCTCGTCAAAAATGTAGTGGAT  
TATTTCCAATCTACCTATCAACTTTTGAAGAAAACATAAAAAACTTCTTCTGTAAAAA-  
GTTGATAATTAATATTATTACAATGACTACCCTATCAAAAATTTCTAAATCTATTCAAAGACATCCTTT  
CCATCT

>PAG18

AGGTGTATATTACGGTCAATGTAGTGAAATTTGTGGTATCAATCATGGTTTTATGCCAATTGTAGTTGAA  
GCTACTTCTTTACCAAATTATGTTTCTTGAATTTCTAATAAATTAATGAATAATTATGAAAATTTGTT  
ATTTCAATTATTATTATTAATACTTTTATTAATACTTTTATTTCAATTAACCTCGTCAAAAATGTAGTGGAT  
TATTTCCAATCTACCTATCAACTTTTGAAGAAAACATAAAAAACTTCTTCTGTAAAAA-  
GTTGATAATTAATATTATTACAATGACTACCCTATCAAAAATTTCTAAATCTATTCAAAGACATCCTTT  
CCATCT

>PAG86

AGGTGTATATTACGGTCAATGTAGTGAAATTTGTGGTATCAATCATGGTTTTATGCCAATTGTAGTTGAA  
GCTACTTCTTTACCAAATTATGTTTCTTGAATTTCTAATAAATTAATGAATAATTATGAAAATTTGTT  
ATTTCAATTATTATTATTAATACTTTTATTAATACTTTTATTTCAATTAACCTCGTCAAAAATGTAGTGGAT  
TATTTCCAATCTACCTATCAACTTTTGAAGAAAACATAAAAAACTTCTTCTGTAAAAA-  
GTTGATAATTAATATTATTACAATGACTACCCTATCAAAAATTTCTAAATCTATTCAAAGACATCCTTT  
CCATCT

>PAG77

AGGTGTATATTACGGTCAATGTAGTGAAATTTGTGGTATCAATCATGGTTTTATGCCAATTGTAGTTGAA  
GCTACTTCTTTACCAAATTATGTTTCTTGAATTTCTAATAAATTAATGAATAATTATGAAAATTTGTT  
ATTTCAATTATTATTATTAATAGTTTTATTAATAGTTTTATTTCAATTAACCTCGTCAAAAATGTAGTGGAT  
TATTTCCAATCTACCTATCAACTTTTGAAGAAAACATAAAAAACTTCTTCTGTAAAAA-  
GTTGATAATTAATATTATTACAATGACTACCCTATCAAAAATTTCTAAATCTATTCAAAGACATCCTTT  
CCATCT

>PAG8

AGGTGTATATTACGGTCAATGTAGTGAAATTTGTGGTATCAATCATGGTTTTATGCCAATTGTAGTTGAA  
GCTACTTCTTTACCAAATTATGTTTCTTGAATTTCTAATAAATTAATGAATAATTATGAAAATTTGTT  
ATTTCAATTATTATTATTAATAGTTTTATTAATAGTTTTATTTCAATTAACCTCGTCAAAAATGTAGTGGAT

TATTTCCAATCTACCTATCAACTTTTGAAGAAAAC TAAAAAACTTCTTCTGTAAAAA-  
GTTGATAATTAATATTATTACAATGACTACCCTATCAAAAATTTCTAAATCTATTCAAAGACATCCTTT  
CCATCT

>PAG9

AGGTGTATATTACGGTCAATGTAGTGAAATTTGTGGTATCAATCATGGTTTTATGCCAATTGTAGTTGAA  
GCTACTTCTTTACCAAATTATGTTTCTTGAATTTCTAATAAATTAATGAATAATTATGAAAATTTGTT  
ATTTCAATTATTATTATTAATAGTTTTATTAATAGTTTTATTTCAATTAAC TCGTCAAAAATGTAGTGGAT  
TATTTCCAATCTACCTATCAACTTTTGAAGAAAAC TAAAAAACTTCTTCTGTAAAAA-  
GTTGATAATTAATATTATTACAATGACTACCCTATCAAAAATTTCTAAATCTATTCAAAGACATCCTTT  
CCATCT

>PAG16

AGGTGTATATTACGGTCAATGTAGTGAAATTTGTGGTATCAATCATGGTTTTATGCCAATTGTAGTTGAA  
GCTACTTCTTTACCAAATTATGTTTCTTGAATTTCTAATAAATTAATGAATAATTATGAAAATTTGTT  
ATTTCAATTATTATTATTAATAGTTTTATTAATAGTTTTATTTCAATTAAC TCGTCAAAAATGTAGTGGAT  
TATTTCCAATCTACCTATCAACTTTTGAAGAAAAC TAAAAAACTTCTTCTGTAAAAA-  
GTTGATAATTAATATTATTACAATGACTACCCTATCAAAAATTTCTAAATCTATTCAAAGACATCCTTT  
CCATCT

>PAG17

AGGTGTATATTACGGTCAATGTAGTGAAATTTGTGGTATCAATCATGGTTTTATGCCAATTGTAGTTGAA  
GCTACTTCTTTACCAAATTATGTTTCTTGAATTTCTAATAAATTAATGAATAATTATGAAAATTTGTT  
ATTTCAATTATTATTATTAATAGTTTTATTAATAGTTTTATTTCAATTAAC TCGTCAAAAATGTAGTGGAT  
TATTTCCAATCTACCTATCAACTTTTGAAGAAAAC TAAAAAACTTCTTCTGTAAAAA-  
GTTGATAATTAATATTATTACAATGACTACCCTATCAAAAATTTCTAAATCTATTCAAAGACATCCTTT  
CCATCT

>PAG27

AGGTGTATATTACGGTCAATGTAGTGAAATTTGTGGTATCAATCATGGTTTTATGCCAATTGTAGTTGAA  
GCTACTTCTTTACCAAATTATGTTTCTTGAATTTCTAATAAATTAATGAATAATTATGAAAATTTGTT  
ATTTCAATTATTATTATTAATAGTTTTATTAATAGTTTTATTTCAATTAAC TCGTCAAAAATGTAGTGGAT  
TATTTCCAATCTACCTATCAACTTTTGAAGAAAAC TAAAAAACTTCTTCTGTAAAAA-  
GTTGATAATTAATATTATTACAATGACTACCCTATCAAAAATTTCTAAATCTATTCAAAGACATCCTTT  
CCATCT

>PAG39

AGGTGTATATTACGGTCAATGTAGTGAAATTTGTGGTATCAATCATGGTTTTATGCCAATTGTAGTTGAA  
GCTACTTCTTTACCAAATTATGTTTCTTGAATTTCTAATAAATTAATGAATAATTATGAAAATTTGTT  
ATTTCAATTATTATTATTAATAGTTTTATTAATAGTTTTATTTCAATTAAC TCGTCAAAAATGTAGTGGAT  
TATTTCCAATCTACCTATCAACTTTTGAAGAAAAC TAAAAAACTTCTTCTGTAAAAA-  
GTTGATAATTAATATTATTACAATGACTACCCTATCAAAAATTTCTAAATCTATTCAAAGACATCCTTT  
CCATCT

>PAG40

AGGTGTATATTACGGTCAATGTAGTGAAATTTGTGGTATCAATCATGGTTTTATGCCAATTGTAGTTGAA  
GCTACTTCTTTACCAAATTATGTTTCTTGAATTTCTAATAAATTAATGAATAATTATGAAAATTTGTT  
ATTTCAATTATTATTATTAATAGTTTTATTAATAGTTTTATTTCAATTAAC TCGTCAAAAATGTAGTGGAT  
TATTTCCAATCTACCTATCAACTTTTGAAGAAAAC TAAAAAACTTCTTCTGTAAAAA-  
GTTGATAATTAATATTATTACAATGACTACCCTATCAAAAATTTCTAAATCTATTCAAAGACATCCTTT  
CCATCT

>PAG65

AGGTGTATATTACGGTCAATGTAGTGAAATTTGTGGTATCAATCATGGTTTTATGCCAATTGTAGTTGAA  
GCTACTTCTTTACCAAATTATGTTTCTTGAATTTCTAATAAATTAATGAATAATTATGAAAATTTGTT  
ATTTCAATTATTATTATTAATAGTTTTATTAATAGTTTTATTTCAATTAAC TCGTCAAAAATGTAGTGGAT  
TATTTCCAATCTACCTATCAACTTTTGAAGAAAAC TAAAAAACTTCTTCTGTAAAAA-

GTTGATAATTAATATTATTACAATGACTACCCTATCAAAAATTTCTAAATCTATTCAAAGACATCCTTT  
CCATCT

>PAG68

AGGTGTATATTACGGTCAATGTAGTGAAATTTGTGGTATCAATCATGGTTTTATGCCAATTGTAGTTGAA  
GCTACTTCTTTACCAAATTATGTTTCTTGAATTTCTAATAAATTAATGAATAATTATGAAAATTTGTT  
ATTTCAATTATTATTATTAATAGTTTTATTAATAGTTTTATTTCAATTAECTCGTCAAAAATGTAGTGGAT  
TATTTCCAATCTACCTATCAACTTTTGAAGAAAACATAAAAAACTTCTTCTGTAAAAA-  
GTTGATAATTAATATTATTACAATGACTACCCTATCAAAAATTTCTAAATCTATTCAAAGACATCCTTT  
CCATCT

>TOR18

AGGTGTATATTACGGTCAATGTAGTGAAATTTGTGGTATCAATCATGGTTTTATGCCAATTGTAGTTGAA  
GCTACTTCTTTACCAAATTATGTTTCTTGAATTTCTAATAAATTAATGAATAATTATGAAAATTTGTT  
ATTTCAATTATTATTATTAATAGTTTTATTAATAGTTTTATTTCAATTAECTCGTCAAAAATGTAGTGGAT  
TATTTCCAATCTACCTATCAACTTTTGAAGAAAACATAAAAAACTTCTTCTGTAAAAA-  
GTTGATAATTAATATTATTACAATGACTACCCTATCAAAAATTTCTAAATCTATTCAAAGACATCCTTT  
CCATCT

>TOR1

AGGTGTATATTACGGTCAATGTAGTGAAATTTGTGGTATCAATCATGGTTTTATGCCAATTGTAGTTGAA  
GCTACTTCTTTACCAAATTATGTTTCTTGAATTTCTAATAAATTAATGAATAATTATGAAAATTTGTT  
ATTTCAATTATTATTATTAACAGTTTTATTAATAGTTTTATTTCAATTAECTCGTCAAAAATGTAGTGGAT  
TATTTCCAATCTACCTATCAACTTTTGAAGAAAACATAAAAAACTTCTTCTGTAAAAA-  
GTTGATAATTAATATTATTACAATGACTACCCTATCAAAAATTTCTAAATCTATTCAAAGACATCCTTT  
CCATCT

>TOR5

AGGTGTATATTACGGTCAATGTAGTGAAATTTGTGGTATCAATCATGGTTTTATGCCAATTGTAGTTGAA  
GCTACTTCTTTACCAAATTATGTTTCTTGAATTTCTAATAAATTAATGAATAATTATGAAAATTTGTT  
ATTTCAATTATTATTATTAATAGTTTTATTAATAGTTTTATTTCAATTAECTCGTCAAAAATGTAGTGGAT  
TATTTCCAATCTACCTATCAACTTTTGAAGAAAACATAAAAAACTTCTTCTGTAAAAA-  
GTTGATAATTAATATTATTACAATGACTACCCTATCAAAAATTTCTAAATCTATTCAAAGACATCCTTT  
CCATCT

>TOR3

AGGTGTATATTACGGTCAATGTAGTGAAATTTGTGGTATCAATCATGGTTTTATGCCAATTGTAGTTGAA  
GCTACTTCTTTACCAAATTATGTTTCTTGAATTTCTAATAAATTAATGAATAATTATGAAAATTTGTT  
ATTTCAATTATTATTATTAATAGTTTTATTAATAGTTTTATTTCAATTAECTCGTCAAAAATGTAGTGGAT  
TATTTCCAATCTACCTATCAACTTTTGAAGAAAACATAAAAAACTTCTTCTGTAAAAA-  
GTTGATAATTAATATTATTACAATGACTACCCTATCAAAAATTTCTAAATCTATTCAAAGACATCCTTT  
CCATCT

>TOR4

AGGTGTATATTACGGTCAATGTAGTGAAATTTGTGGTATCAATCATGGTTTTATGCCAATTGTAGTTGAA  
GCTACTTCTTTACCAAATTATGTTTCTTGAATTTCTAATAAATTAATGAATAATTATGAAAATTTGTT  
ATTTCAATTATTATTATTAATAGTTTTATTAATAGTTTTATTTCAATTAECTCGTCAAAAATGTAGTGGAT  
TATTTCCAATCTACCTATCAACTTTTGAAGAAAACATAAAAAACTTCTTCTGTAAAAA-  
GTTGATAATTAATATTATTACAATGACTACCCTATCAAAAATTTCTAAATCTATTCAAAGACATCCTTT  
CCATCT

>IL014

AGGTGTATATTACGGTCAATGTAGTGAAATTTGTGGTATCAATCATGGTTTTATGCCAATTGTAGTTGAA  
GCTACTTCTTTACCAAATTATGTTTCTTGAATTTCTAATAAATTAATGAATAATTATGAAAATTTGTT  
ATTTCAATTATTATTATTAATAGTTTTATTAATAGTTTTATTTCAATTAECTCGTCAAAAATGTAGTGGAT  
TATTTCCAATCTACCTATCAACTTTTGAAGAAAACATAAAAAACTTCTTCTGTAAAAA-  
GTTGATAATTAATATTATTACAATGACTACCCTATCAAAAATTTCTAAATCTATTCAAAGACATCCTTT

CCATCT

>IL08

AGGTGTATATTACGGTCAATGTAGTGAAATTTGTGGTATCAATCATGGTTTTATGCCAATTGTAGTTGAA  
GCTACTTCTTTACCAAATTATGTTTCTTGAATTTCTAATAAATTAATGAATAATTATGAAAATTTTCGTT  
ATTTCAATTATTATTATTAATAGTTTTATTAATAGTTTTATTTCAATTAACCTCGTCAAAATGTAGTGGAT  
TATTTCCAATCTACCTATCAACTTTTGAAGAAAACATAAAAAACTTCTTCTGTAAAAA-  
GTTGATAATTAATATTATTACAATGACTACCCTATCAAAAATTTCTAAATCTATTCAAAGACATCCTTT  
CCATCT

>IL02

AGGTGTATATTACGGTCAATGTAGTGAAATTTGTGGTATCAATCATGGTTTTATGCCAATTGTAGTTGAA  
GCTACTTCTTTACCAAATTATGTTTCTTGAATTTCTAATAAATTAATGAATAATTATGAAAATTTTCGTT  
ATTTCAATTATTATTATTAATAGTTTTATTAATAGTTTTATTTCAATTAACCTCGTCAAAATGTAGTGGAT  
TATTTCCAATCTACCTATCAACTTTTGAAGAAAACATAAAAAACTTCTTCTGTAAAAA-  
GTTGATAATTAATATTATTACAATGACTACCCTATCAAAAATTTCTAAATCTATTCAAAGACATCCTTT  
CCATCT

>IL03

AGGTGTATATTACGGTCAATGTAGTGAAATTTGTGGTATCAATCATGGTTTTATGCCAATTGTAGTTGAA  
GCTACTTCTTTACCAAATTATGTTTCTTGAATTTCTAATAAATTAATGAATAATTATGAAAATTTTCGTT  
ATTTCAATTATTATTATTAATAGTTTTATTAATAGTTTTATTTCAATTAACCTCGTCAAAATGTAGTGGAT  
TATTTCCAATCTACCTATCAACTTTTGAAGAAAACATAAAAAACTTCTTCTGTAAAAA-  
GTTGATAATTAATATTATTACAATGACTACCCTATCAAAAATTTCTAAATCTATTCAAAGACATCCTTT  
CCATCT

>IL04

AGGTGTATATTACGGTCAATGTAGTGAAATTTGTGGTATCAATCATGGTTTTATGCCAATTGTAGTTGAA  
GCTACTTCTTTACCAAATTATGTTTCTTGAATTTCTAATAAATTAATGAATAATTATGAAAATTTTCGTT  
ATTTCAATTATTATTATTAATAGTTTTATTAATAGTTTTATTTCAATTAACCTCGTCAAAATGTAGTGGAT  
TATTTCCAATCTACCTATCAACTTTTGAAGAAAACATAAAAAACTTCTTCTGTAAAAA-  
GTTGATAATTAATATTATTACAATGACTACCCTATCAAAAATTTCTAAATCTATTCAAAGACATCCTTT  
CCATCT

>IL05

AGGTGTATATTACGGTCAATGTAGTGAAATTTGTGGTATCAATCATGGTTTTATGCCAATTGTAGTTGAA  
GCTACTTCTTTACCAAATTATGTTTCTTGAATTTCTAATAAATTAATGAATAATTATGAAAATTTTCGTT  
ATTTCAATTATTATTATTAATAGTTTTATTAATAGTTTTATTTCAATTAACCTCGTCAAAATGTAGTGGAT  
TATTTCCAATCTACCTATCAACTTTTGAAGAAAACATAAAAAACTTCTTCTGTAAAAA-  
GTTGATAATTAATATTATTACAATGACTACCCTATCAAAAATTTCTAAATCTATTCAAAGACATCCTTT  
CCATCT

>IL06

AGGTGTATATTACGGTCAATGTAGTGAAATTTGTGGTATCAATCATGGTTTTATGCCAATTGTAGTTGAA  
GCTACTTCTTTACCAAATTATGTTTCTTGAATTTCTAATAAATTAATGAATAATTATGAAAATTTTCGTT  
ATTTCAATTATTATTATTAATAGTTTTATTAATAGTTTTATTTCAATTAACCTCGTCAAAATGTAGTGGAT  
TATTTCCAATCTACCTATCAACTTTTGAAGAAAACATAAAAAACTTCTTCTGTAAAAA-  
GTTGATAATTAATATTATTACAATGACTACCCTATCAAAAATTTCTAAATCTATTCAAAGACATCCTTT  
CCATCT

>IL07

AGGTGTATATTACGGTCAATGTAGTGAAATTTGTGGTATCAATCATGGTTTTATGCCAATTGTAGTTGAA  
GCTACTTCTTTACCAAATTATGTTTCTTGAATTTCTAATAAATTAATGAATAATTATGAAAATTTTCGTT  
ATTTCAATTATTATTATTAATAGTTTTATTAATAGTTTTATTTCAATTAACCTCGTCAAAATGTAGTGGAT  
TATTTCCAATCTACCTATCAACTTTTGAAGAAAACATAAAAAACTTCTTCTGTAAAAA-  
GTTGATAATTAATATTATTACAATGACTACCCTATCAAAAATTTCTAAATCTATTCAAAGACATCCTTT  
CCATCT

>IL09

AGGTGTATATTACGGTCAATGTAGTGAAATTTGTGGTATCAATCATGGTTTTATGCCAATTGTAGTTGAA  
GCTACTTCTTTACCAAATTATGTTTCTTGAATTTCTAATAAATTAATGAATAATTATGAAAATTTTCGTT  
ATTTCAATTATTATTATTAATAGTTTTATTAATAGTTTTATTTCAATTAACCTCGTCAAAATGTAGTGGAT  
TATTTCCAATCTACCTATCAACTTTTGAAGAAAACATAAAAAACTTCTTCTGTAAAAA-----  
GTTGATAATTAATATTATTACAATGACTACCCTATCAAAAATTTCTAAATCTATTCAAAGACATCCTTT  
CCATCT

>IL010

AGGTGTATATTACGGTCAATGTAGTGAAATTTGTGGTATCAATCATGGTTTTATGCCAATTGTAGTTGAA  
GCTACTTCTTTACCAAATTATGTTTCTTGAATTTCTAATAAATTAATGAATAATTATGAAAATTTTCGTT  
ATTTCAATTATTATTATTAATAGTTTTATTAATAGTTTTATTTCAATTAACCTCGTCAAAATGTAGTGGAT  
TATTTCCAATCTACCTATCAACTTTTGAAGAAAACATAAAAAACTTCTTCTGTAAAAA-----  
GTTGATAATTAATATTATTACAATGACTACCCTATCAAAAATTTCTAAATCTATTCAAAGACATCCTTT  
CCATCT

>IL011

AGGTGTATATTACGGTCAATGTAGTGAAATTTGTGGTATCAATCATGGTTTTATGCCAATTGTAGTTGAA  
GCTACTTCTTTACCAAATTATGTTTCTTGAATTTCTAATAAATTAATGAATAATTATGAAAATTTTCGTT  
ATTTCAATTATTATTATTAATAGTTTTATTAATAGTTTTATTTCAATTAACCTCGTCAAAATGTAGTGGAT  
TATTTCCAATCTACCTATCAACTTTTGAAGAAAACATAAAAAACTTCTTCTGTAAAAA-----  
GTTGATAATTAATATTATTACAATGACTACCCTATCAAAAATTTCTAAATCTATTCAAAGACATCCTTT  
CCATCT

>IL012

AGGTGTATATTACGGTCAATGTAGTGAAATTTGTGGTATCAATCATGGTTTTATGCCAATTGTAGTTGAA  
GCTACTTCTTTACCAAATTATGTTTCTTGAATTTCTAATAAATTAATGAATAATTATGAAAATTTTCGTT  
ATTTCAATTATTATTATTAATAGTTTTATTAATAGTTTTATTTCAATTAACCTCGTCAAAATGTAGTGGAT  
TATTTCCAATCTACCTATCAACTTTTGAAGAAAACATAAAAAACTTCTTCTGTAAAAA-----  
GTTGATAATTAATATTATTACAATGACTACCCTATCAAAAATTTCTAAATCTATTCAAAGACATCCTTT  
CCATCT

>IL013

AGGTGTATATTACGGTCAATGTAGTGAAATTTGTGGTATCAATCATGGTTTTATGCCAATTGTAGTTGAA  
GCTACTTCTTTACCAAATTATGTTTCTTGAATTTCTAATAAATTAATGAATAATTATGAAAATTTTCGTT  
ATTTCAATTATTATTATTAATAGTTTTATTAATAGTTTTATTTCAATTAACCTCGTCAAAATGTAGTGGAT  
TATTTCCAATCTACCTATCAACTTTTGAAGAAAACATAAAAAACTTCTTCTGTAAAAA-----  
GTTGATAATTAATATTATTACAATGACTACCCTATCAAAAATTTCTAAATCTATTCAAAGACATCCTTT  
CCATCT

>BIN26

AGGTGTATATTACGGTCAATGTAGTGAAATTTGTGGTATCAATCATGGTTTTATGCCAATTGTAGTTGAA  
GCTACTTCTTTACCAAATTATGTTTCTTGAATTTCTAATAAATTAATGAATAATTATGAAAATTTTCGTT  
ATTTCAATTATTATTATTAATA-----  
GTTTTATTTCAATTAACCTCGTCAAAATGTAGTGGATTATTTCCAATCTACCTATCAACTTTTGAAGAAA  
CTAAAAAACTTCTTCTGTAAAAA-----  
GTTGATAATTAATATTATTACAATGACTACCCTATCAAAAATTTCTAAATCTATTCAAAGACATCCTTT  
CCATCT

>BIN6

AGGTGTATATTACGGTCAATGTAGTGAAATTTGTGGTATCAATCATGGTTTTATGCCAATTGTAGTTGAA  
GCTACTTCTTTACCAAATTATGTTTCTTGAATTTCTAATAAATTAATGAATAATTATGAAAATTTTCGTT  
ATTTCAATTATTATTATTAATAGTTTTATTAATAGTTTTATTTCAATTAACCTCGTCAAAATGTAGTGGAT  
TATTTCCAATCTACCTATCAACTTTTGAAGAAAACATAAAAAACTTCTTCTGTAAAAA-----  
GTTGATAATTAATATTATTACAATGACTACCCTATCAAAAATTTCTAAATCTATTCAAAGACATCCTTT  
CCATCT

>BIN34

AGGTGTATATTACGGTCAATGTAGTGAAATTTGTGGTATCAATCATGGTTTTATGCCAATTGTAGTTGAA  
GCTACTTCTTTACCAAATTATGTTTCTTGAATTTCTAATAAATTAATGAATAATTATGAAAATTTTCGTT  
ATTTCAATTATTATTATTAATAGTTTTATTAATAGTTTTATTTCAATTAACCTCGTCAAAATGTAGTGGAT  
TATTTCCAATCTACCTATCAACTTTTGAAGAAAACATAAAAAACTTCTTCTGTAAAAAAAAA—  
GTTGATAATTAATATTATTACAATGACTACCCTATCAAAAATTTCTAAATCTATTCAAAGACATCCTTT  
CCATCT

>BIN28

AGGTGTATATTACGGTCAATGTAGTGAAATTTGTGGTATCAATCATGGTTTTATGCCAATTGTAGTTGAA  
GCTACTTCTTTACCAAATTATGTTTCTTGAATTTCTAATAAATTAATGAATAATTATGAAAATTTTCGTT  
ATTTCAATTATTATTATTAATAGTTTTATTAATAGTTTTATTTCAATTAACCTCGTCAAAATGTAGTGGAT  
TATTTCCAATCTACCTATCAACTTTTGAAGAAAACATAAAAAACTTCTTCTGTAAAAAAAAA—  
GTTGATAATTAATATTATTACAATGACTACCCTATCAAAAATTTCTAAATCTATTCAAAGACATCCTTT  
CCATCT

>BIN33

AGGTGTATATTACGGTCAATGTAGTGAAATTTGTGGTATCAATCATGGTTTTATGCCAATTGTAGTTGAA  
GCTACTTCTTTACCAAATTATGTTTCTTGAATTTCTAATAAATTAATGAATAATTATGAAAATTTTCGTT  
ATTTCAATTATTATTATTAATAGTTTTATTAATAGTTTTATTTCAATTAACCTCGTCAAAATGTAGTGGAT  
TATTTCCAATCTACCTATCAACTTTTGAAGAAAACATAAAAAACTTCTTCTGTAAAAAAAAA—  
GTTGATAATTAATATTATTACAATGACTACCCTATCAAAAATTTCTAAATCTATTCAAAGACATCCTTT  
CCATCT

>BIN7

AGGTGTATATTACGGTCAATGTAGTGAAATTTGTGGTATCAATCATGGTTTTATGCCAATTGTAGTTGAA  
GCTACTTCTTTACCAAATTATGTTTCTTGAATTTCTAATAAATTAATAAATAATTATGAAAATTTTCGTT  
ATTTCAATTATTATTATTAATAGTTTTATTAATAGTTTTATTTCAATTAACCTCGTCAAAATGTAGTGGAT  
TATTTCCAATCTACCTATCAACTTTTGAAGAAAACATAAAAAACTTCTTCTGTAAAAAAAAA—  
GTTGATAATTAATATTATTACAATGACTACCCTATCAAAAATTTCTAAATCTATTCAAAGACATCCTTT  
CCATCT

>BIN25

AGGTGTATATTACGGTCAATGTAGTGAAATTTGTGGTATCAATCATGGTTTTATGCCAATTGTAGTTGAA  
GCTACTTCTTTACCAAATTATGTTTCTTGAATTTCTAATAAATTAATAAATAATTATGAAAATTTTCGTT  
ATTTCAATTATTATTATTAATAGTTTTATTAATAGTTTTATTTCAATTAACCTCGTCAAAATGTAGTGGAT  
TATTTCCAATCTACCTATCAACTTTTGAAGAAAACATAAAAAACTTCTTCTGTAAAAAAAAA—  
GTTGATAATTAATATTATTACAATGACTACCCTATCAAAAATTTCTAAATCTATTCAAAGACATCCTTT  
CCATCT

>BIN2

AGGTGTATATTACGGTCAATGTAGTGAAATTTGTGGTATCAATCATGGTTTTATGCCAATTGTAGTTGAA  
GCTACTTCTTTACCAAATTATGTTTCTTGAATTTCTAATAAATTAATGAATAATTATGAAAATTTTCGTT  
ATTTCAATTATTATTATTAATAGTTTTATTAATAGTTTTATTTCAATTAACCTCGTCAAAATGTAGTGGAT  
TATTTCCAATCTACCTATCAACTTTTGAAGAAAACATAAAAAACTTCTTCTGTAAAAAAAAA—  
GTTGATAATTAATATTATTACAATGACTACCCTATCAAAAATTTCTAAATCTATTCAAAGACATCCTTT  
CCATCT

>BIN8

AGGTGTATATTACGGTCAATGTAGTGAAATTTGTGGTATCAATCATGGTTTTATGCCAATTGTAGTTGAA  
GCTACTTCTTTACCAAATTATGTTTCTTGAATTTCTAATAAATTAATGAATAATTATGAAAATTTTCGTT  
ATTTCAATTATTATTATTAATAGTTTTATTAATAGTTTTATTTCAATTAACCTCGTCAAAATGTAGTGGAT  
TATTTCCAATCTACCTATCAACTTTTGAAGAAAACATAAAAAACTTCTTCTGTAAAAAAAAA—  
GTTGATAATTAATATTATTACAATGACTACCCTATCAAAAATTTCTAAATCTATTCAAAGACATCCTTT  
CCATCT

>BIN10





GCTACTTCTTTACCAAATTATGTTTCTTGAATTTCTAATAAATTAATGAATAATTATGAAAATTTTCGTT  
ATTTCAATTATTATTATTAATAGTTTTATTAATAGTTTTATTTCAATTAACCTCGTCAAAAATGTAGTGGAT  
TATTTCCAATCTACCTATCAACTTTTGAAGAAAACATAAAAAACTTCTTCTGTAAAAA-  
GTTGATAATTAATATTATTACAATGACTACCTATCAAAAATTTCTAAATCTATTCAAAGACATCCTTT  
CCATCT

>B0R7

AGGTGTATATTACGGTCAATGTAGTGAATTTGTGGTATCAATCATGGTTTTATGCCAATTGTAGTTGAA  
GCTACTTCTTTACCAAATTATGTTTCTTGAATTTCTAATAAATTAATGAATAATTATGAAAATTTTCGTT  
ATTTCAATTATTATTATTAATAGTTTTATTAATAGTTTTATTTCAATTAACCTCGTCAAAAATGTAGTGGAT  
TATTTCCAATCTACCTATCAACTTTTGAAGAAAACATAAAAAACTTCTTCTGTAAAAA-  
GTTGATAATTAATATTATTACAATGACTACCTATCAAAAATTTCTAAATCTATTCAAAGACATCCTTT  
CCATCT

>B0R12

AGGTGTATATTACGGTCAATGTAGTGAATTTGTGGTATCAATCATGGTTTTATGCCAATTGTAGTTGAA  
GCTACTTCTTTACCAAATTATGTTTCTTGAATTTCTAATAAATTAATGAATAATTATGAAAATTTTCGTT  
ATTTCAATTATTATTATTAATAGTTTTATTAATAGTTTTATTTCAATTAACCTCGTCAAAAATGTAGTGGAT  
TATTTCCAATCTACCTATCAACTTTTGAAGAAAACATAAAAAACTTCTTCTGTAAAAA-  
GTTGATAATTAATATTATTACAATGACTACCTATCAAAAATTTCTAAATCTATTCAAAGACATCCTTT  
CCATCT

>B0R6

AGGTGTATATTACGGTCAATGTAGTGAATTTGTGGTATCAATCATGGTTTTATGCCAATTGTAGTTGAA  
GCTACTTCTTTACCAAATTATGTTTCTTGAATTTCTAATAAATTAATGAATAATTATGAAAATTTTCGTT  
ATTTCAATTATTATTATTAATAGTTTTATTAATAGTTTTATTTCAATTAACCTCGTCAAAAATGTAGTGGAT  
TATTTCCAATCTACCTATCAACTTTTGAAGAAAACATAAAAAACTTCTTCTGTAAAAA-  
GTTGATAATTAATATTATTACAATGACTACCTATCAAAAATTTCTAAATCTATTCAAAGACATCCTTT  
CCATCT

>B0R4

AGGTGTATATTACGGTCAATGTAGTGAATTTGTGGTATCAATCATGGTTTTATGCCAATTGTAGTTGAA  
GCTACTTCTTTACCAAATTATGTTTCTTGAATTTCTAATAAATTAATGAATAATTATGAAAATTTTCGTT  
ATTTCAATTATTATTATTAATAGTTTTATTAATAGTTTTATTTCAATTAACCTCGTCAAAAATGTAGTGGAT  
TATTTCCAATCTACCTATCAACTTTTGAAGAAAACATAAAAAACTTCTTCTGTAAAAA-  
GTTGATAATTAATATTATTACAATGACTACCTATCAAAAATTTCTAAATCTATTCAAAGACATCCTTT  
CCATCT

>B0R1

AGGTGTATATTACGGTCAATGTAGTGAATTTGTGGTATCAATCATGGTTTTATGCCAATTGTAGTTGAA  
GCTACTTCTTTACCAAATTATGTTTCTTGAATTTCTAATAAATTAATGAATAATTATGAAAATTTTCGTT  
ATTTCAATTATTATTATTAATAGTTTTATTAATAGTTTTATTTCAATTAACCTCGTCAAAAATGTAGTGGAT  
TATTTCCAATCTACCTATCAACTTTTGAAGAAAACATAAAAAACTTCTTCTGTAAAAA-  
GTTGATAATTAATATTATTACAATGACTACCTATCAAAAATTTCTAAATCTATTCAAAGACATCCTTT  
CCATCT

>B0R10

AGGTGTATATTACGGTCAATGTAGTGAATTTGTGGTATCAATCATGGTTTTATGCCAATTGTAGTTGAA  
GCTACTTCTTTACCAAATTATGTTTCTTGAATTTCTAATAAATTAATGAATAATTATGAAAATTTTCGTT  
ATTTCAATTATTATTATTAATAGTTTTATTAATAGTTTTATTTCAATTAACCTCGTCAAAAATGTAGTGGAT  
TATTTCCAATCTACCTATCAACTTTTGAAGAAAACATAAAAAACTTCTTCTGTAAAAA-  
GTTGATAATTAATATTATTACAATGACTACCTATCAAAAATTTCTAAATCTATTCAAAGACATCCTTT  
CCATCT

>B0R2

AGGTGTATATTACGGTCAATGTAGTGAATTTGTGGTATCAATCATGGTTTTATGCCAATTGTAGTTGAA  
GCTACTTCTTTACCAAATTATGTTTCTTGAATTTCTAATAAATTAATGAATAATTATGAAAATTTTCGTT

ATTTCAATTATTATTATTAATAGTTTTATTAATAGTTTTATTTCAATTAACCTCGTCAAAAATGTAGTGGAT  
TATTTCCAATCTACCTATCAACTTTTGAAGAAAACATAAAAAACTTCTTCTGTAAAAA-  
GTTGATAATTAATATTATTACAATGACTACCCTATCAAAAATTTCTAAATCTATTCAAAGACATCCTTT  
CCATCT

>B0R5

AGGTGTATATTACGGTCAATGTAGTGAATTTGTGGTATCAATCATGGTTTTATGCCAATTGTAGTTGAA  
GCTACTTCTTTACCAAATTATGTTTCTTGAATTTCTAATAAATTAATGAATAATTATGAAAATTTGTT  
ATTTCAATTATTATTATTAATAGTTTTATTAATAGTTTTATTTCAATTAACCTCGTCAAAAATGTAGTGGAT  
TATTTCCAATCTACCTATCAACTTTTGAAGAAAACATAAAAAACTTCTTCTGTAAAAA-  
GTTGATAATTAATATTATTACAATGACTACCCTATCAAAAATTTCTAAATCTATTCAAAGACATCCTTT  
CCATCT

>B0R11

AGGTGTATATTACGGTCAATGTAGTGAATTTGTGGTATCAATCATGGTTTTATGCCAATTGTAGTTGAA  
GCTACTTCTTTACCAAATTATGTTTCTTGAATTTCTAATAAATTAATGAATAATTATGAAAATTTGTT  
ATTTCAATTATTATTATTAATAGTTTTATTAATAGTTTTATTTCAATTAACCTCGTCAAAAATGTAGTGGAT  
TATTTCCAATCTACCTATCAACTTTTGAAGAAAACATAAAAAACTTCTTCTGTAAAAA-  
GTTGATAATTAATATTATTACAATGACTACCCTATCAAAAATTTCTAAATCTATTCAAAGACATCCTTT  
CCATCT

>B0R9

AGGTGTATATTACGGTCAATGTAGTGAATTTGTGGTATCAATCATGGTTTTATGCCAATTGTAGTTGAA  
GCTACTTCTTTACCAAATTATGTTTCTTGAATTTCTAATAAATTAATGAATAATTATGAAAATTTGTT  
ATTTCAATTATTATTATTAATAGTTTTATTAATAGTTTTATTTCAATTAACCTCGTCAAAAATGTAGTGGAT  
TATTTCCAATCTACCTATCAACTTTTGAAGAAAACATAAAAAACTTCTTCTGTAAAAA-  
GTTGATAATTAATATTATTACAATGACTACCCTATCAAAAATTTCTAAATCTATTCAAAGACATCCTTT  
CCATCT

>B0R14

AGGTGTATATTACGGTCAATGTAGTGAATTTGTGGTATCAATCATGGTTTTATGCCAATTGTAGTTGAA  
GCTACTTCTTTACCAAATTATGTTTCTTGAATTTCTAATAAATTAATGAATAATTATGAAAATTTGTT  
ATTTCAATTATTATTATTAATAGTTTTATTAATAGTTTTATTTCAATTAACCTCGTCAAAAATGTAGTGGAT  
TATTTCCAATCTACCTATCAACTTTTGAAGAAAACATAAAAAACTTCTTCTGTAAAAA-  
GTTGATAATTAATATTATTACAATGACTACCCTATCAAAAATTTCTAAATCTATTCAAAGACATCCTTT  
CCATCT

>ANC74

AGGTGTATATTACGGTCAATGTAGTGAATTTGTGGTATCAATCATGGTTTTATGCCAATTGTAGTTGAA  
GCTACTTCTTTACCAAATTATGTTTCTTGAATTTCTAATAAATTAATGAATAATTATGAAAATTTGTT  
ATTTCAATTATTATTATTAATAGTTTTATTAATAGTTTTATTTCAATTAACCTCGTCAAAAATGTAGTGGAT  
TATTTCCAATCTACCTATCAACTTTTGAAGAAAACATAAAAAACTTCTTCTGTAAAAA-  
GTTGATAATTAATATTATTACAATGACTACCCTATCAAAAATTTCTAAATCTATTCAAAGACATCCTTT  
CCATCT

>ANC61

AGGTGTATATTACGGTCAATGTAGTGAATTTGTGGTATCAATCATGGTTTTATGCCAATTGTAGTTGAA  
GCTACTTCTTTACCAAATTATGTTTCTTGAATTTCTAATAAATTAATGAATAATTATGAAAATTTGTT  
ATTTCAATTATTATTATTAATAGTTTTATTAATAGTTTTATTTCAATTAACCTCGTCAAAAATGTAGTGGAT  
TATTTCCAATCTACCTATCAACTTTTGAAGAAAACATAAAAAACTTCTTCTGTAAAAA-  
GTTGATAATTAATATTATTACAATGACTACCCTATCAAAAATTTCTAAATCTATTCAAAGACATCCTTT  
CCATCT

>ANC60

AGGTGTATATTACGGTCAATGTAGTGAATTTGTGGTATCAATCATGGTTTTATGCCAATTGTAGTTGAA  
GCTACTTCTTTACCAAATTATGTTTCTTGAATTTCTAATAAATTAATGAATAATTATGAAAATTTGTT  
ATTTCAATTATTATTATTAATAGTTTTATTAATAGTTTTATTTCAATTAACCTCGTCAAAAATGTAGTGGAT

TATTTCCAATCTACCTATCAACTTTTGAAGAAAAC TAAAAAACTTCTTCTGTAAAAA-  
GTTGATAATTAATATTATTACAATGACTACCCTATCAAAAATTTCTAAATCTATTCAAAGACATCCTTT  
CCATCT

>ANC66

AGGTGTATATTACGGTCAATGTAGTGAAATTTGTGGTATCAATCATGGTTTTATGCCAATTGTAGTTGAA  
GCTACTTCTTTACCAAATTATGTTTCTTGAATTTCTAATAAATTAATGAATAATTATGAAAATTTGTT  
ATTTCAATTATTATTATTAATAGTTTTATTAATAGTTTTATTTCAATTAAC TCGTCAAAAATGTAGTGGAT  
TATTTCCAATCTACCTATCAACTTTTGAAGAAAAC TAAAAAACTTCTTCTGTAAAAA-  
GTTGATAATTAATATTATTACAATGACTACCCTATCAAAAATTTCTAAATCTATTCAAAGACATCCTTT  
CCATCT

>ANC51

AGGTGTATATTACGGTCAATGTAGTGAAATTTGTGGTATCAATCATGGTTTTATGCCAATTGTAGTTGAA  
GCTACTTCTTTACCAAATTATGTTTCTTGAATTTCTAATAAATTAATGAATAATTATGAAAATTTGTT  
ATTTCAATTATTATTATTAATAGTTTTATTAATAGTTTTATTTCAATTAAC TCGTCAAAAATGTAGTGGAT  
TATTTCCAATCTACCTATCAACTTTTGAAGAAAAC TAAAAAACTTCTTCTGTAAAAA-  
GTTGATAATTAATATTATTACAATGACTACCCTATCAAAAATTTCTAAATCTATTCAAAGACATCCTTT  
CCATCT

>ANC56

AGGTGTATATTACGGTCAATGTAGTGAAATTTGTGGTATCAATCATGGTTTTATGCCAATTGTAGTTGAA  
GCTACTTCTTTACCAAATTATGTTTCTTGAATTTCTAATAAATTAATGAATAATTATGAAAATTTGTT  
ATTTCAATTATTATTATTAATAGTTTTATTAATAGTTTTATTTCAATTAAC TCGTCAAAAATGTAGTGGAT  
TATTTCCAATCTACCTATCAACTTTTGAAGAAAAC TAAAAAACTTCTTCTGTAAAAA-  
GTTGATAATTAATATTATTACAATGACTACCCTATCAAAAATTTCTAAATCTATTCAAAGACATCCTTT  
CCATCT

>ANC75

AGGTGTATATTACGGTCAATGTAGTGAAATTTGTGGTATCAATCATGGTTTTATGCCAATTGTAGTTGAA  
GCTACTTCTTTACCAAATTATGTTTCTTGAATTTCTAATAAATTAATGAATAATTATGAAAATTTGTT  
ATTTCAATTATTATTATTAATAGTTTTATTAATAGTTTTATTTCAATTAAC TCGTCAAAAATGTAGTGGAT  
TATTTCCAATCTACCTATCAACTTTTGAAGAAAAC TAAAAAACTTCTTCTGTAAAAA-  
GTTGATAATTAATATTATTACAATGACTACCCTATCAAAAATTTCTAAATCTATTCAAAGACATCCTTT  
CCATCT

>ANC78

AGGTGTATATTACGGTCAATGTAGTGAAATTTGTGGTATCAATCATGGTTTTATGCCAATTGTAGTTGAA  
GCTACTTCTTTACCAAATTATGTTTCTTGAATTTCTAATAAATTAATGAATAATTATGAAAATTTGTT  
ATTTCAATTATTATTATTAATAGTTTTATTAATAGTTTTATTTCAATTAAC TCGTCAAAAATGTAGTGGAT  
TATTTCCAATCTACCTATCAACTTTTGAAGAAAAC TAAAAAACTTCTTCTGTAAAAA-  
GTTGATAATTAATATTATTACAATGACTACCCTATCAAAAATTTCTAAATCTATTCAAAGACATCCTTT  
CCATCT

>ANC63

AGGTGTATATTACGGTCAATGTAGTGAAATTTGTGGTATCAATCATGGTTTTATGCCAATTGTAGTTGAA  
GCTACTTCTTTACCAAATTATGTTTCTTGAATTTCTAATAAATTAATGAATAATTATGAAAATTTGTT  
ATTTCAATTATTATTATTAATAGTTTTATTAATAGTTTTATTTCAATTAAC TCGTCAAAAATGTAGTGGAT  
TATTTCCAATCTACCTATCAACTTTTGAAGAAAAC TAAAAAACTTCTTCTGTAAAAA-  
GTTGATAATTAATATTATTACAATGACTACCCTATCAAAAATTTCTAAATCTATTCAAAGACATCCTTT  
CCATCT

>ANC77

AGGTGTATATTACGGTCAATGTAGTGAAATTTGTGGTATCAATCATGGTTTTATGCCAATTGTAGTTGAA  
GCTACTTCTTTACCAAATTATGTTTCTTGAATTTCTAATAAATTAATGAATAATTATGAAAATTTGTT  
ATTTCAATTATTATTATTAATAGTTTTATTAATAGTTTTATTTCAATTAAC TCGTCAAAAATGTAGTGGAT  
TATTTCCAATCTACCTATCAACTTTTGAAGAAAAC TAAAAAACTTCTTCTGTAAAAA-

GTTGATAATTAATATTATTACAATGACTACCCTATCAAAAATTTCTAAATCTATTCAAAGACATCCTTT  
CCATCT

>ANC71

AGGTGTATATTACGGTCAATGTAGTGAAATTTGTGGTATCAATCATGGTTTTATGCCAATTGTAGTTGAA  
GCTACTTCTTTACCAAATTATGTTTCTTGAATTTCTAATAAATTAATGAATAATTATGAAAATTTGTT  
ATTTCAATTATTATTATTAATAGTTTTATTAATAGTTTTATTTCAATTAECTCGTCAAAAATGTAGTGGAT  
TATTTCCAATCTACCTATCAACTTTTGAAGAAAACATAAAAAACTTCTTCTGTAAAAA-  
GTTGATAATTAATATTATTACAATGACTACCCTATCAAAAATTTCTAAATCTATTCAAAGACATCCTTT  
CCATCT

>ANC9

AGGTGTATATTACGGTCAATGTAGTGAAATTTGTGGTATCAATCATGGTTTTATGCCAATTGTAGTTGAA  
GCTACTTCTTTACCAAATTATGTTTCTTGAATTTCTAATAAATTAATGAATAATTATGAAAATTTGTT  
ATTTCAATTATTATTATTAATAGTTTTATTAATAGTTTTATTTCAATTAECTCGTCAAAAATGTAGTGGAT  
TATTTCCAATCTACCTATCAACTTTTGAAGAAAACATAAAAAACTTCTTCTGTAAAAA-  
GTTGATAATTAATATTATTACAATGACTACCCTATCAAAAATTTCTAAATCTATTCAAAGACATCCTTT  
CCATCT

>ANC22

AGGTGTATATTACGGTCAATGTAGTGAAATTTGTGGTATCAATCATGGTTTTATGCCAATTGTAGTTGAA  
GCTACTTCTTTACCAAATTATGTTTCTTGAATTTCTAATAAATTAATGAATAATTATGAAAATTTGTT  
ATTTCAATTATTATTATTAATAGTTTTATTAATAGTTTTATTTCAATTAECTCGTCAAAAATGTAGTGGAT  
TATTTCCAATCTACCTATCAACTTTTGAAGAAAACATAAAAAACTTCTTCTGTAAAAA-  
GTTGATAATTAATATTATTACAATGACTACCCTATCAAAAATTTCTAAATCTATTCAAAGACATCCTTT  
CCATCT

>ANC19

AGGTGTATATTACGGTCAATGTAGTGAAATTTGTGGTATCAATCATGGTTTTATGCCAATTGTAGTTGAA  
GCTACTTCTTTACCAAATTATGTTTCTTGAATTTCTAATAAATTAATGAATAATTATGAAAATTTGTT  
ATTTCAATTATTATTATTAATAGTTTTATTAATAGTTTTATTTCAATTAECTCGTCAAAAATGTAGTGGAT  
TATTTCCAATCTACCTATCAACTTTTGAAGAAAACATAAAAAACTTCTTCTGTAAAAA-  
GTTGATAATTAATATTATTACAATGACTACCCTATCAAAAATTTCTAAATCTATTCAAAGACATCCTTT  
CCATCT

>ANC24

AGGTGTATATTACGGTCAATGTAGTGAAATTTGTGGTATCAATCATGGTTTTATGCCAATTGTAGTTGAA  
GCTACTTCTTTACCAAATTATGTTTCTTGAATTTCTAATAAATTAATGAATAATTATGAAAATTTGTT  
ATTTCAATTATTATTATTAATAGTTTTATTAATAGTTTTATTTCAATTAECTCGTCAAAAATGTAGTGGAT  
TATTTCCAATCTACCTATCAACTTTTGAAGAAAACATAAAAAACTTCTTCTGTAAAAA-  
GTTGATAATTAATATTATTACAATGACTACCCTATCAAAAATTTCTAAATCTATTCAAAGACATCCTTT  
CCATCT

>ANC49

AGGTGTATATTACGGTCAATGTAGTGAAATTTGTGGTATCAATCATGGTTTTATGCCAATTGTAGTTGAA  
GCTACTTCTTTACCAAATTATGTTTCTTGAATTTCTAATAAATTAATGAATAATTATGAAAATTTGTT  
ATTTCAATTATTATTATTAATAGTTTTATTAATAGTTTTATTTCAATTAECTCGTCAAAAATGTAGTGGAT  
TATTTCCAATCTACCTATCAACTTTTGAAGAAAACATAAAAAACTTCTTCTGTAAAAA-  
GTTGATAATTAATATTATTACAATGACTACCCTATCAAAAATTTCTAAATCTATTCAAAGACATCCTTT  
CCATCT

>ANC52

AGGTGTATATTACGGTCAATGTAGTGAAATTTGTGGTATCAATCATGGTTTTATGCCAATTGTAGTTGAA  
GCTACTTCTTTACCAAATTATGTTTCTTGAATTTCTAATAAATTAATGAATAATTATGAAAATTTGTT  
ATTTCAATTATTATTATTAATAGTTTTATTAATAGTTTTATTTCAATTAECTCGTCAAAAATGTAGTGGAT  
TATTTCCAATCTACCTATCAACTTTTGAAGAAAACATAAAAAACTTCTTCTGTAAAAA-  
GTTGATAATTAATATTATTACAATGACTACCCTATCAAAAATTTCTAAATCTATTCAAAGACATCCTTT

CCATCT

>ANC69

AGGTGTATATTACGGTCAATGTAGTGAAATTTGTGGTATCAATCATGGTTTTATGCCAATTGTAGTTGAA  
GCTACTTCTTTACCAAATTATGTTTCTTGAATTTCTAATAAATTAATGAATAATTATGAAAATTTTCGTT  
ATTTCAATTATTATTATTAATAGTTTTATTAATAGTTTTATTTCAATTAACCTCGTCAAAAATGTAGTGGAT  
TATTTCCAATCTACCTATCAACTTTTGAAGAAAACATAAAAAACTTCTTCTGTAAAAA-----  
GTTGATAATTAATATTATTACAATGACTACCCTATCAAAAATTTCTAAATCTATTCAAAGACATCCTTT  
CCATCT

>CAL14

AGGTGTATATTACGGTCAATGTAGTGAAATTTGTGGTATCAATCATGGTTTTATGCCAATTGTAGTTGAA  
GCTACTTCTTTACCAAATTATGTTTCTTGAATTTCTAATAAATTAATGAATAATTATGAAAATTTTCGTT  
ATTTCAATTATTATTATTAATAGTTTTATTAATAGTTTTATTTCAATTAACCTCGTCAAAAATGTAGTGGAT  
TATTTCCAATCTACCTATCAACTTTTGAAGAAAACATAAAAAACTTCTTCTGTAAAAA-----  
GTTGATAATTAATATTATTACAATGACTACCCTATCAAAAATTTCTAAATCTATTCAAAGACATCCTTT  
CCATCT

>CAL21

AGGTGTATATTACGGTCAATGTAGTGAAATTTGTGGTATCAATCATGGTTTTATGCCAATTGTAGTTGAA  
GCTACTTCTTTACCAAATTATGTTTCTTGAATTTCTAATAAATTAATGAATAATTATGAAAATTTTCGTT  
ATTTCAATTATTATTATTAATAGTTTTATTAATAGTTTTATTTCAATTAACCTCGTCAAAAATGTAGTGGAT  
TATTTCCAATCTACCTATCAACTTTTGAAGAAAACATAAAAAACTTCTTCTGTAAAAA-----  
GTTGATAATTAATATTATTACAATGACTACCCTATCAAAAATTTCTAAATCTATTCAAAGACATCCTTT  
CCATCT

>CAL29

AGGTGTATATTACGGTCAATGTAGTGAAATTTGTGGTATCAATCATGGTTTTATGCCAATTGTAGTTGAA  
GCTACTTCTTTACCAAATTATGTTTCTTGAATTTCTAATAAATTAATGAATAATTATGAAAATTTTCGTT  
ATTTCAATTATTATTATTAATAGTTTTATTAATAGTTTTATTTCAATTAACCTCGTCAAAAATGTAGTGGAT  
TATTTCCAATCTACCTATCAACTTTTGAAGAAAACATAAAAAACTTCTTCTGTAAAAA-----  
GTTGATAATTAATATTATTACAATGACTACCCTATCAAAAATTTCTAAATCTATTCAAAGACATCCTTT  
CCATCT

>CAL23

AGGTGTATATTACGGTCAATGTAGTGAAATTTGTGGTATCAATCATGGTTTTATGCCAATTGTAGTTGAA  
GCTACTTCTTTACCAAATTATGTTTCTTGAATTTCTAATAAATTAATGAATAATTATGAAAATTTTCGTT  
ATTTCAATTATTATTATTA-----  
TAGTTTTATTTCAATTAACCTCGTCAAAAATGTAGTGGATTATTTCCAATCTACCTATCAACTTTTGAAGAA  
AACTAAAAAACTTCTTCTGTAAAAA-----  
GTTGATAATTAATATTATTACAATGACTACCCTATCAAAAATTTCTAAATCTATTCAAAGACATCCTTT  
CCATCT

>CAL3

AGGTGTATATTACGGTCAATGTAGTGAAATTTGTGGTATCAATCATGGTTTTATGCCAATTGTAGTTGAA  
GCTACTTCTTTACCAAATTATGTTTCTTGAATTTCTAATAAATTAATGAATAATTATGAAAATTTTCGTT  
ATTTCAATTATTATTATTAATAGTTTTATTAATAGTTTTATTTCAATTAACCTCGTCAAAAATGTAGTGGAT  
TATTTCCAATCTACCTATCAACTTTTGAAGAAAACATAAAAAACTTCTTCTGTAAAAA-----  
GTTGATAATTAATATTATTACAATGACTACCCTATCAAAAATTTCTAAATCTATTCAAAGACATCCTTT  
CCATCT

>CAL9

AGGTGTATATTACGGTCAATGTAGTGAAATTTGTGGTATCAATCATGGTTTTATGCCAATTGTAGTTGAA  
GCTACTTCTTTACCAAATTATGTTTCTTGAATTTCTAATAAATTAATGAATAATTATGAAAATTTTCGTT  
ATTTCAATTATTATTATTAATAGTTTTATTAATAGTTTTATTTCAATTAACCTCGTCAAAAATGTAGTGGAT  
TATTTCCAATCTACCTATCAACTTTTGAAGAAAACATAAAAAACTTCTTCTGTAAAAA-----  
GTTGATAATTAATATTATTACAATGACTACCCTATCAAAAATTTCTAAATCTATTCAAAGACATCCTTT

CCATCT

>CAL40

AGGTGTATATTACGGTCAATGTAGTGAAATTTGTGGTATCAATCATGGTTTTATGCCAATTGTAGTTGAA  
GCTACTTCTTTACCAAATTATGTTTCTTGAATTTCTAATAAATTAATGAATAATTATGAAAATTTTCGTT  
ATTTCAATTATTATTATTAATAGTTTTATTAATAGTTTTATTTCAATTAACCTCGTCAAAATGTAGTGGAT  
TATTTCCAATCTACCTATCAACTTTTGAAGAAAACATAAAAAACTTCTTCTGTAAAAA-  
GTTGATAATTAATATTATTACAATGACTACCCTATCAAAAATTTCTAAATCTATTCAAAGACATCCTTT  
CCTTCT

>CAL19

AGGTGTATATTACGGTCAATGTAGTGAAATTTGTGGTATCAATCATGGTTTTATGCCAATTGTAGTTGAA  
GCTACTTCTTTACCAAATTATGTTTCTTGAATTTCTAATAAATTAATGAATAATTATGAAAATTTTCGTT  
ATTTCAATTATTATTATTAATAGTTTTATTAATAGTTTTATTTCAATTAACCTCGTCAAAATGTAGTGGAT  
TATTTCCAATCTACCTATCAACTTTTGAAGAAAACATAAAAAACTTCTTCTGTAAAAA-  
GTTGATAATTAATATTATTACAATGACTACCCTATCAAAAATTTCTAAATCTATTCAAAGACATCCTTT  
CCATCT

>CAL5

AGGTGTATATTACGGTCAATGTAGTGAAATTTGTGGTATCAATCATGGTTTTATGCCAATTGTAGTTGAA  
GCTACTTCTTTACCAAATTATGTTTCTTGAATTTCTAATAAATTAATGAATAATTATGAAAATTTTCGTT  
ATTTCAATTATTATTATTAATAGTTTTATTAATAGTTTTATTTCAATTAACCTCGTCAAAATGTAGTGGAT  
TATTTCCAATCTACCTATCAACTTTTGAAGAAAACATAAAAAACTTCTTCTGTAAAAA-  
GTTGATAATTAATATTATTACAATGACTACCCTATCAAAAATTTCTAAATCTATTCAAAGACATCCTTT  
CCATCT

>CAL17

AGGTGTATATTACGGTCAATGTAGTGAAATTTGTGGTATCAATCATGGTTTTATGCCAATTGTAGTTGAA  
GCTACTTCTTTACCAAATTATGTTTCTTGAATTTCTAATAAATTAATGAATAATTATGAAAATTTTCGTT  
ATTTCAATTATTATTATTAATAGTTTTATTAATAGTTTTATTTCAATTAACCTCGTCAAAATGTAGTGGAT  
TATTTCCAATCTACCTATCAACTTTTGAAGAAAACATAAAAAACTTCTTCTGTAAAAA-  
GTTGATAATTAATATTATTACAATGACTACCCTATCAAAAATTTCTAAATCTATTCAAAGACATCCTTT  
CCATCT

>CAL36

AGGTGTATATTACGGTCAATGTAGTGAAATTTGTGGTATCAATCATGGTTTTATGCCAATTGTAGTTGAA  
GCTACTTCTTTACCAAATTATGTTTCTTGAATTTCTAATAAATTAATGAATAATTATGAAAATTTTCGTT  
ATTTCAATTATTATTATTAATAGTTTTATTAATAGTTTTATTTCAATTAACCTCGTCAAAATGTAGTGGAT  
TATTTCCAATCTACCTATCAACTTTTGAAGAAAACATAAAAAACTTCTTCTGTAAAAA-  
GTTGATAATTAATATTATTACAATGACTACCCTATCAAAAATTTCTAAATCTATTCAAAGACATCCTTT  
CCATCT

>CAL37

AGGTGTATATTACGGTCAATGTAGTGAAATTTGTGGTATCAATCATGGTTTTATGCCAATTGTAGTTGAA  
GCTACTTCTTTACCAAATTATGTTTCTTGAATTTCTAATAAATTAATGAATAATTATGAAAATTTTCGTT  
ATTTCAATTATTATTATTAATAGTTTTATTAATAGTTTTATTTCAATTAACCTCGTCAAAATGTAGTGGAT  
TATTTCCAATCTACCTATCAACTTTTGAAGAAAACATAAAAAACTTCTTCTGTAAAAA-  
GTTGATAATTAATATTATTACAATGACTACCCTATCAAAAATTTCTAAATCTATTCAAAGACATCCTTT  
CCATCT

>CAL4

AGGTGTATATTACGGTCAATGTAGTGAAATTTGTGGTATCAATCATGGTTTTATGCCAATTGTAGTTGAA  
GCTACTTCTTTACCAAATTATGTTTCTTGAATTTCTAATAAATTAATGAATAATTATGAAAATTTTCGTT  
ATTTCAATTATTATTATTAATAGTTTTATTAATAGTTTTATTTCAATTAACCTCGTCAAAATGTAGTGGAT  
TATTTCCAATCTACCTATCAACTTTTGAAGAAAACATAAAAAACTTCTTCTGTAAAAA-  
GTTGATAATTAATATTATTACAATGACTACCCTATCAAAAATTTCTAAATCTATTCAAAGACATCCTTT  
CCATCT

>CAL25

AGGTGTATATTACGGTCAATGTAGTGAAATTTGTGGTATCAATCATGGTTTTATGCCAATTGTAGTTGAA  
GCTACTTCTTTACCAAATTATGTTTCTTGAATTTCTAATAAATTAATGAATAATTATGAAAATTTTCGTT  
ATTTCAATTATTATTATTAATAGTTTTATTAATAGTTTTATTTCAATTAACCTCGTCAAAATGTAGTGGAT  
TATTTCCAATCTACCTATCAACTTTTGAAGAAAACATAAAAAACTTCTTCTGTAAAAA-  
GTTGATAATTAATATTATTACAATGACTACCCTATCAAAAATTTCTAAATCTATTCAAAGACATCCTTT  
CCATCT

>CAL16

AGGTGTATATTACGGTCAATGTAGTGAAATTTGTGGTATCAATCATGGTTTTATGCCAATTGTAGTTGAA  
GCTACTTCTTTACCAAATTATGTTTCTTGAATTTCTAATAAATTAATGAATAATTATGAAAATTTTCGTT  
ATTTCAATTATTATTATTAATAGTTTTATTAATAGTTTTATTTCAATTAACCTCGTCAAAATGTAGTGGAT  
TATTTCCAATCTACCTATCAACTTTTGAAGAAAACATAAAAAACTTCTTCTGTAAAAA-  
GTTGATAATTAATATTATTACAATGACTACCCTATCAAAAATTTCTAAATCTATTCAAAGACATCCTTT  
CCATCT

>CAL15

AGGTGTATATTACGGTCAATGTAGTGAAATTTGTGGTATCAATCATGGTTTTATGCCAATTGTAGTTGAA  
GCTACTTCTTTACCAAATTATGTTTCTTGAATTTCTAATAAATTAATGAATAATTATGAAAATTTTCGTT  
ATTTCAATTATTATTATTAATAGTTTTATTAATAGTTTTATTTCAATTAACCTCGTCAAAATGTAGTGGAT  
TATTTCCAATCTACCTATCAACTTTTGAAGAAAACATAAAAAACTTCTTCTGTAAAAA-  
GTTGATAATTAATATTATTACAATGACTACCCTATCAAAAATTTCTAAATCTATTCAAAGACATCCTTT  
CCATCT

>CAL8

AGGTGTATATTACGGTCAATGTAGTGAAATTTGTGGTATCAATCATGGTTTTATGCCAATTGTAGTTGAA  
GCTACTTCTTTACCAAATTATGTTTCTTGAATTTCTAATAAATTAATGAATAATTATGAAAATTTTCGTT  
ATTTCAATTATTATTATTAATAGTTTTATTAATAGTTTTATTTCAATTAACCTCGTCAAAATGTAGTGGAT  
TATTTCCAATCTACCTATCAACTTTTGAAGAAAACATAAAAAACTTCTTCTGTAAAAA-  
GTTGATAATTAATATTATTACAATGACTACCCTATCAAAAATTTCTAAATCTATTCAAAGACATCCTTT  
CCATCT

>BL019

AGGTGTATATTACGGTCAATGTAGTGAAATTTGTGGTATCAATCATGGTTTTATGCCAATTGTAGTTGAA  
GCTACTTCTTTACCAAATTATGTTTCTTGAATTTCTAATAAATTAATGAATAATTATGAAAATTTTCGTT  
ATTTCAATTATTATTATTAATAGTTTTATTAATAGTTTTATTTCAATTAACCTCGTCAAAATGTAGTGGAT  
TATTTCCAATCTACCTATCAACTTTTGAAGAAAACATAAAAAACTTCTTCTGTAAAAA-  
GTTGATAATTAATATTATTACAATGACTACCCTATCAAAAATTTCTAAATCTATTCAAAGACATCCTTT  
CCATCT

>BL05

AGGTGTATATTACGGTCAATGTAGTGAAATTTGTGGTATCAATCATGGTTTTATGCCAATTGTAGTTGAA  
GCTACTTCTTTACCAAATTATGTTTCTTGAATTTCTAATAAATTAATGAATAATTATGAAAATTTTCGTT  
ATTTCAATTATTATTATTAATAGTTTTATTAATAGTTTTATTTCAATTAACCTCGTCAAAATGTAGTGGAT  
TATTTCCAATCTACCTATCAACTTTTGAAGAAAACATAAAAAACTTCTTCTGTAAAAA-  
GTTGATAATTAATATTATTACAATGACTACCCTATCAAAAATTTCTAAATCTATTCAAAGACATCCTTT  
CCATCT

>BL09

AGGTGTATATTACGGTCAATGTAGTGAAATTTGTGGTATCAATCATGGTTTTATGCCAATTGTAGTTGAA  
GCTACTTCTTTACCAAATTATGTTTCTTGAATTTCTAATAAATTAATGAATAATTATGAAAATTTTCGTT  
ATTTCAATTATTATTATTAATAGTTTTATTAATAGTTTTATTTCAATTAACCTCGTCAAAATGTAGTGGAT  
TATTTCCAATCTACCTATCAACTTTTGAAGAAAACATAAAAAACTTCTTCTGTAAAAA-  
GTTGATAATTAATATTATTACAATGACTACCCTATCAAAAATTTCTAAATCTATTCAAAGACATCCTTT  
CCATCT

>BL02

AGGTGTATATTACGGTCAATGTAGTGAAATTTGTGGTATCAATCATGGTTTTATGCCAATTGTAGTTGAA  
GCTACTTCTTTACCAAATTATGTTTCTTGAATTTCTAATAAATTAATGAATAATTATGAAAATTTTCGTT  
ATTTCAATTATTATTATTAATAGTTTTATTAATAGTTTTATTTCAATTAACCTCGTCAAAAATGTAGTGGAT  
TATTTCCAATCTACCTATCAACTTTTGAAGAAAACATAAAAAACTTCTTCTGTAAAAA-  
GTTGATAATTAATATTATTACAATGACTACCCTATCAAAAATTTCTAAATCTATTCAAAGACATCCTTT  
CCATCT

>BL014

AGGTGTATATTACGGTCAATGTAGTGAAATTTGTGGTATCAATCATGGTTTTATGCCAATTGTAGTTGAA  
GCTACTTCTTTACCAAATTATGTTTCTTGAATTTCTAATAAATTAATGAATAATTATGAAAATTTTCGTT  
ATTTCAATTATTATTATTAATAGTTTTATTAATAGTTTTATTTCAATTAACCTCGTCAAAAATGTAGTGGAT  
TATTTCCAATCTACCTATCAACTTTTGAAGAAAACATAAAAAACTTCTTCTGTAAAAA-  
GTTGATAATTAATATTATTACAATGACTACCCTATCAAAAATTTCTAAATCTATTCAAAGACATCCTTT  
CCATCT

>BL020

AGGTGTATATTACGGTCAATGTAGTGAAATTTGTGGTATCAATCATGGTTTTATGCCAATTGTAGTTGAA  
GCTACTTCTTTACCAAATTATGTTTCTTGAATTTCTAATAAATTAATGAATAATTATGAAAATTTTCGTT  
ATTTCAATTATTATTATTAATAGTTTTATTAATAGTTTTATTTCAATTAACCTCGTCAAAAATGTAGTGGAT  
TATTTCCAATCTACCTATCAACTTTTGAAGAAAACATAAAAAACTTCTTCTGTAAAAA-  
GTTGATAATTAATATTATTACAATGACTACCCTATCAAAAATTTCTAAATCTATTCAAAGACATCCTTT  
CCATCT

>BL013

AGGTGTATATTACGGTCAATGTAGTGAAATTTGTGGTATCAATCATGGTTTTATGCCAATTGTAGTTGAA  
GCTACTTCTTTACCAAATTATGTTTCTTGAATTTCTAATAAATTAATGAATAATTATGAAAATTTTCGTT  
ATTTCAATTATTATTATTAATAGTTTTATTAATAGTTTTATTTCAATTAACCTCGTCAAAAATGTAGTGGAT  
TATTTCCAATCTACCTATCAACTTTTGAAGAAAACATAAAAAACTTCTTCTGTAAAAA-  
GTTGATAATTAATATTATTACAATGACTACCCTATCAAAAATTTCTAAATCTATTCAAAGACATCCTTT  
CCATCT

>BL010

AGGTGTATATTACGGTCAATGTAGTGAAATTTGTGGTATCAATCATGGTTTTATGCCAATTGTAGTTGAA  
GCTACTTCTTTACCAAATTATGTTTCTTGAATTTCTAATAAATTAATGAATAATTATGAAAATTTTCGTT  
ATTTCAATTATTATTATTAATAGTTTTATTAATAGTTTTATTTCAATTAACCTCGTCAAAAATGTAGTGGAT  
TATTTCCAATCTACCTATCAACTTTTGAAGAAAACATAAAAAACTTCTTCTGTAAAAA-  
GTTGATAATTAATATTATTACAATGACTACCCTATCAAAAATTTCTAAATCTATTCAAAGACATCCTTT  
CCATCT

>BL015

AGGTGTATATTACGGTCAATGTAGTGAAATTTGTGGTATCAATCATGGTTTTATGCCAATTGTAGTTGAA  
GCTACTTCTTTACCAAATTATGTTTCTTGAATTTCTAATAAATTAATGAATAATTATGAAAATTTTCGTT  
ATTTCAATTATTATTATTAATAGTTTTATTAATAGTTTTATTTCAATTAACCTCGTCAAAAATGTAGTGGAT  
TATTTCCAATCTACCTATCAACTTTTGAAGAAAACATAAAAAACTTCTTCTGTAAAAA-  
GTTGATAATTAATATTATTACAATGACTACCCTATCAAAAATTTCTAAATCTATTCAAAGACATCCTTT  
CCATCT

>BL01

AGGTGTATATTACGGTCAATGTAGTGAAATTTGTGGTATCAATCATGGTTTTATGCCAATTGTAGTTGAA  
GCTACTTCTTTACCAAATTATGTTTCTTGAATTTCTAATAAATTAATGAATAATTATGAAAATTTTCGTT  
ATTTCAATTATTATTATTAATAGTTTTATTAATAGTTTTATTTCAATTAACCTCGTCAAAAATGTAGTGGAT  
TATTTCCAATCTACCTATCAACTTTTGAAGAAAACATAAAAAACTTCTTCTGTAAAAA-  
GTTGATAATTAATATTATTACAATGACTACCCTATCAAAAATTTCTAAATCTATTCAAAGACATCCTTT  
CCATCT

>BL08

AGGTGTATATTACGGTCAATGTAGTGAAATTTGTGGTATCAATCATGGTTTTATGCCAATTGTAGTTGAA



GCTACTTCTTTACCAAATTATGTTTCTTGAATTTCTAATAAATTAATGAATAATTATGAAAATTTTCGTT  
ATTTCAATTATTATTATTAATAGTTTTATTAATAGTTTTATTTCAATTAACCTCGTCAAAATGTAGTGGAT  
TATTTCCAATCTACCTATCAACTTTTGAAGAAAACATAAAAAACTTCTTCTGTAAAAA-  
GTTGATAATTAATATTATTACAATGACTACCCTATCAAAAATTTCTAAATCTATTCAAAGACATCCTTT  
CCATCT

>BL012

AGGTGTATATTACGGTCAATGTAGTGAATTTGTGGTATCAATCATGGTTTTATGCCAATTGTAGTTGAA  
GCTACTTCTTTACCAAATTATGTTTCTTGAATTTCTAATAAATTAATGAATAATTATGAAAATTTTCGTT  
ATTTCAATTATTATTATTAATAGTTTTATTAATAGTTTTATTTCAATTAACCTCGTCAAAATGTAGTGGAT  
TATTTCCAATCTACCTATCAACTTTTGAAGAAAACATAAAAAACTTCTTCTGTAAAAA-  
GTTGATAATTAATATTATTACAATGACTACCCTATCAAAAATTTCTAAATCTATTCAAAGACATCCTTT  
CCATCT

>BL017

AGGTGTATATTACGGTCAATGTAGTGAATTTGTGGTATCAATCATGGTTTTATGCCAATTGTAGTTGAA  
GCTACTTCTTTACCAAATTATGTTTCTTGAATTTCTAATAAATTAATGAATAATTATGAAAATTTTCGTT  
ATTTCAATTATTATTATTAATAGTTTTATTAATAGTTTTATTTCAATTAACCTCGTCAAAATGTAGTGGAT  
TATTTCCAATCTACCTATCAACTTTTGAAGAAAACATAAAAAACTTCTTCTGTAAAAA-  
GTTGATAATTAATATTATTACAATGACTACCCTATCAAAAATTTCTAAATCTATTCAAAGACATCCTTT  
CCATCT

>BL06

AGGTGTATATTACGGTCAATGTAGTGAATTTGTGGTATCAATCATGGTTTTATGCCAATTGTAGTTGAA  
GCTACTTCTTTACCAAATTATGTTTCTTGAATTTCTAATAAATTAATGAATAATTATGAAAATTTTCGTT  
ATTTCAATTATTATTATTAATAGTTTTATTAATAGTTTTATTTCAATTAACCTCGTCAAAATGTAGTGGAT  
TATTTCCAATCTACCTATCAACTTTTGAAGAAAACATAAAAAACTTCTTCTGTAAAAA-  
GTTGATAATTAATATTATTACAATGACTACCCTATCAAAAATTTCTAAATCTATTCAAAGACATCCTTT  
CCATCT

>BL011

AGGTGTATATTACGGTCAATGTAGTGAATTTGTGGTATCAATCATGGTTTTATGCCAATTGTAGTTGAA  
GCTACTTCTTTACCAAATTATGTTTCTTGAATTTCTAATAAATTAATGAATAATTATGAAAATTTTCGTT  
ATTTCAATTATTATTATTAATAGTTTTATTAATAGTTTTATTTCAATTAACCTCGTCAAAATGTAGTGGAT  
TATTTCCAATCTACCTATCAACTTTTGAAGAAAACATAAAAAACTTCTTCTGTAAAAA-  
GTTGATAATTAATATTATTACAATGACTACCCTATCAAAAATTTCTAAATCTATTCAAAGACATCCTTT  
CCATCT

>BL018

AGGTGTATATTACGGTCAATGTAGTGAATTTGTGGTATCAATCATGGTTTTATGCCAATTGTAGTTGAA  
GCTACTTCTTTACCAAATTATGTTTCTTGAATTTCTAATAAATTAATGAATAATTATGAAAATTTTCGTT  
ATTTCAATTATTATTATTAATACTTTTATTAATACTTTTATTTCAATTAACCTCGTCAAAATGTAGTGGAT  
TATTTCCAATCTACCTATCAACTTTTGAAGAAAACATAAAAAACTTCTTCTGTAAAAA-  
GTTGATAATTAATATTATTACAATGACTACCCTATCAAAAATTTCTAAATCTATTCAAAGACATCCTTT  
CCATCT

>BL07

AGGTGTATATTACGGTCAATGTAGTGAATTTGTGGTATCAATCATGGTTTTATGCCAATTGTAGTTGAA  
GCTACTTCTTTACCAAATTATGTTTCTTGAATTTCTAATAAATTAATGAATAATTATGAAAATTTTCGTT  
ATTTCAATTATTATTATTAATAGTTTTATTAATAGTTTTATTTCAATTAACCTCGTCAAAATGTAGTGGAT  
TATTTCCAATCTACCTATCAACTTTTGAAGAAAACATAAAAAACTTCTTCTGTAAAAA-  
GTTGATAATTAATATTATTACAATGACTACCCTATCAAAAATTTCTAAATCTATTCAAAGACATCCTTT  
CCATCT

>BCH24

AGGTGTATATTACGGTCAATGTAGTGAATTTGTGGTATCAATCATGGTTTTATGCCAATTGTAGTTGAA  
GCTACTTCTTTACCAAATTATGTTTCTTGAATTTCTAATAAATTAATGAATAATTATGAAAATTTTCGTT

ATTTCAATTATTATTATTAATAGTTTTATTAATAGTTTTATTTCAATTAACCTCGTCAAAAATGTAGTGGAT  
TATTTCCAATCTACCTATCAACTTTTTGAAGAAAACATAAAAAACTTCTTCTGTAAAAA-  
GTTGATAATTAATATTATTACAATGACTACCTTATCAAAAATTTCTAAATCTATTCAAAGACATCCTTT  
CCATCT

>BCH10

AGGTGTATATTACGGTCAATGTAGTGAAATTTGTGGTATCAATCATGGTTTTATGCCAATTGTAGTTGAA  
GCTACTTCTTTACCAAATTATGTTTCTTGAATTTCTAATAAATTAATGAATAATTATGAAAATTTGTT  
ATTTCAATTATTATTATTAATAGTTTTATTAATAGTTTTATTTCAATTAACCTCGTCAAAAATGTAGTGGAT  
TATTTCCAATCTACCTATCAACTTTTTGAAGAAAACATAAAAAACTTCTTCTGTAAAAA-  
GTTGATAATTAATATTATTACAATGACTACCCTATCAAAAATTTCTAAATCTATTCAAAGACATCCTTT  
CCATCT

>BCH25

AGGTGTATATTACGGTCAATGTAGTGAAATTTGTGGTATCAATCATGGTTTTATGCCAATTGTAGTTGAA  
GCTACTTCTTTACCAAATTATGTTTCTTGAATTTCTAATAAATTAATGAATAATTATGAAAATTTGTT  
ATTTCAATTATTATTATTAATAGTTTTATTAATAGTTTTATTTCAATTAACCTCGTCAAAAATGTAGTGGAT  
TATTTCCAATCTACCTATCAACTTTTTGAAGAAAACATAAAAAACTTCTTCTGTAAAAA-  
GTTGATAATTAATATTATTACAATGACTACCCTATCAAAAATTTCTAAATCTATTCAAAGACATCCTTT  
CCATCT

>BCH20

AGGTGTATATTACGGTCAATGTAGTGAAATTTGTGGTATCAATCATGGTTTTATGCCAATTGTAGTTGAA  
GCTACTTCTTTACCAAATTATGTTTCTTGAATTTCTAATAAATTAATGAATAATTATGAAAATTTGTT  
ATTTCAATTATTATTATTAATAGTTTTATTAATAGTTTTATTTCAATTAACCTCGTCAAAAATGTAGTGGAT  
TATTTCCAATCTACCTATCAACTTTTTGAAGAAAACATAAAAAACTTCTTCTGTAAAAA-  
GTTGATAATTAATATTATTACAATGACTACCCTATCAAAAATTTCTAAATCTATTCAAAGACATCCTTT  
CCATCT

>BCH18

AGGTGTATATTACGGTCAATGTAGTGAAATTTGTGGTATCAATCATGGTTTTATGCCAATTGTAGTTGAA  
GCTACTTCTTTACCAAATTATGTTTCTTGAATTTCTAATAAATTAATGAATAATTATGAAAATTTGTT  
ATTTCAATTATTATTATTAATAGTTTTATTAATAGTTTTATTTCAATTAACCTCGTCAAAAATGTAGTGGAT  
TATTTCCAATCTACCTATCAACTTTTTGAAGAAAACATAAAAAACTTCTTCTGTAAAAA-  
GTTGATAATTAATATTATTACAATGACTACCCTATCAAAAATTTCTAAATCTATTCAAAGACATCCTTT  
CCATCT

>BCH26

AGGTGTATATTACGGTCAATGTAGTGAAATTTGTGGTATCAATCATGGTTTTATGCCAATTGTAGTTGAA  
GCTACTTCTTTACCAAATTATGTTTCTTGAATTTCTAATAAATTAATAAATAATTATGAAAATTTGTT  
ATTTCAATTATTATTATTAATAGTTTTATTAATAGTTTTATTTCAATTAACCTCGTCAAAAATGTAGTGGAT  
TATTTCCAATCTACCTATCAACTTTTTGAAGAAAACATAAAAAACTTCTTCTGTAAAAA-  
GTTGATAATTAATAGTATTACAATGACTACCCTATCAAAAATTTCTAAATCTATTCAAAGACATCCTTT  
CCATCT

>BCH16

AGGTGTATATTACGGTCAATGTAGTGAAATTTGTGGTATCAATCATGGTTTTATGCCAATTGTAGTTGAA  
GCTACTTCTTTACCAAATTATGTTTCTTGAATTTCTAATAAATTAATGAATAATTATGAAAATTTGTT  
ATTTCAATTATTATTATTAATAGTTTTATTAATAGTTTTATTTCAATTAACCTCGTCAAAAATGTAGTGGAT  
TATTTCCAATCTACCTATCAACTTTTTGAAGAAAACATAAAAAACTTCTTCTGTAAAAA-  
GTTGATAATTAATATTATTACAATGACTACCCTATCAAAAATTTCTAAATCTATTCAAAGACATCCTTT  
CCATCT

>BCH31

AGGTGTATATTACGGTCAATGTAGTGAAATTTGTGGTATCAATCATGGTTTTATGCCAATTGTAGTTGAA  
GCTACTTCTTTACCAAATTATGTTTCTTGAATTTCTAATAAATTAATGAATAATTATGAAAATTTGTT  
ATTTCAATTATTATTATTAATAGTTTTATTAATAGTTTTATTTCAATTAACCTCGTCAAAAATGTAGTGGAT

TATTTCCAATCTACCTATCAACTTTTGAAGAAAACATAAAAAACTTCTTCTGTAAAAAAGTTGAT  
AATTAATATTATTACAATGACTACCCTATCAAAAATTTCTAAATCTATTCAAAGACATCCTTTCCATCT  
>BCH21

AGGTGTATATTACGGTCAATGTAGTGAAATTTGTGGTATCAATCATGGTTTTATGCCAATTGTAGTTGAA  
GCTACTTCTTTACCAAATTATGTTTCTTGAATTTCTAATAAATTAATGAATAATTATGAAAATTTGTT  
ATTTCAATTATTATTATTAATAGTTTTATTAATAGTTTTATTTCAATTAACCTCGTCAAAAATGTAGTGGAT  
TATTTCCAATCTACCTATCAACTTTTGAAGAAAACATAAAAAACTTCTTCTGTAAAAAAGTTGAT  
GTTGATAATTAATATTATTACAATGACTACCCTATCAAAAATTTCTAAATCTATTCAAAGACATCCTTT  
CCATCT

>BCH5

AGGTGTATATTACGGTCAATGTAGTGAAATTTGTGGTATCAATCATGGTTTTATGCCAATTGTAGTTGAA  
GCTACTTCTTTACCAAATTATGTTTCTTGAATTTCTAATAAATTAACAAATAATTATGAAAATTTGTT  
ATTTCAATTATTATTATTAATAGTTTTATTAATAGTTTTATTTCAATTAACCTCGTCAAAAATGTAGTGGAT  
TATTTCCAATCTACCTATCAACTTTTGAAGAAAACATAAAAAACTTCTTCTGTAAAAAAGTTGAT  
GTTGATAATTAATATTATTACAATGACTACCCTATCAAAAATTTCTAAATCTATTCAAAGACATCCTTT  
CCATCT

>BCH29

AGGTGTATATTACGGTCAATGTAGTGAAATTTGTGGTATCAATCATGGTTTTATGCCAATTGTAGTTGAA  
GCTACTTCTTTACCAAATTATGTTTCTTGAATTTCTAATAAATTAATGAATAATTATGAAAATTTGTT  
ATTTCAATTATTATTATTAATAGTTTTATTAATAGTTTTATTTCAATTAACCTCGTCAAAAATGTAGTGGAT  
TATTTCCAATCTACCTATCAACTTTTGAAGAAAACATAAAAAACTTCTTCTGTAAAAAAGTTGAT  
GTTGATAATTAATATTATTACAATGACTACCCTATCAAAAATTTCTAAATCTATTCAAAGACATCCTTT  
CCATCT

>BCH9

AGGTGTATATTACGGTCAATGTAGTGAAATTTGTGGTATCAATCATGGTTTTATGCCAATTGTAGTTGAA  
GCTACTTCTTTACCAAATTATGTTTCTTGAATTTCTAATAAATTAATAAATAATTATGAAAATTTGTT  
ATTTCAATTATTATTATTAATAGTTTTATTAATAGTTTTATTTCAATTAACCTCGTCAAAAATGTAGTGGAT  
TATTTCCAATCTACCTATCAACTTTTGAAGAAAACATAAAAAACTTCTTCTGTAAAAAAGTTGAT  
GTTGATAATTAATAGTATTACAATGACTACCCTATCAAAAATTTCTAAATCTATTCAAAGACATCCTTT  
CCATCT

>BCH13

AGGTGTATATTACGGTCAATGTAGTGAAATTTGTGGTATCAATCATGGTTTTATGCCAATTGTAGTTGAA  
GCTACTTCTTTACCAAATTATGTTTCTTGAATTTCTAATAAATTAATGAATAATTATGAAAATTTGTT  
ATTTCAATTATTATTATTAATAGTTTTATTAATAGTTTTATTTCAATTAACCTCGTCAAAAATGTAGTGGAT  
TATTTCCAATCTACCTATCAACTTTTGAAGAAAACATAAAAAACTTCTTCTGTAAAAAAGTTGAT  
GTTGATAATTAATATTATTACAATGACTACCCTATCAAAAATTTCTAAATCTATTCAAAGACATCCTTT  
CCATCT

>BCH17

AGGTGTATATTACGGTCAATGTAGTGAAATTTGTGGTATCAATCATGGTTTTATGCCAATTGTAGTTGAA  
GCTACTTCTTTACCAAATTATGTTTCTTGAATTTCTAATAAATTAATGAATAATTATGAAAATTTGTT  
ATTTCAATTATTATTATTAATAGTTTTATTAATAGTTTTATTTCAATTAACCTCGTCAAAAATGTAGTGGAT  
TATTTCCAATCTACCTATCAACTTTTGAAGAAAACATAAAAAACTTCTTCTGTAAAAAAGTTGAT  
GTTGATAATTAATATTATTACAATGACTACCCTATCAAAAATTTCTAAATCTATTCAAAGACATCCTTT  
CCATCT

>BCH11

AGGTGTATATTACGGTCAATGTAGTGAAATTTGTGGTATCAATCATGGTTTTATGCCAATTGTAGTTGAA  
GCTACTTCTTTACCAAATTATGTTTCTTGAATTTCTAATAAATTAATGAATAATTATGAAAATTTGTT  
ATTTCAATTATTATTATTAATAGTTTTATTAATAGTTTTATTTCAATTAACCTCGTCAAAAATGTAGTGGAT  
TATTTCCAATCTACCTATCAACTTTTGAAGAAAACATAAAAAACTTCTTCTGTAAAAAAGTTGAT  
GTTGATAATTAATATTATTACAATGACTACCCTATCAAAAATTTCTAAATCTATTCAAAGACATCCTTT

CCATCT

>BCH19

AGGTGTATATTACGGTCAATGTAGTGAAATTTGTGGTATCAATCATGGTTTTATGCCAATTGTAGTTGAA  
GCTACTTCTTTACCAAATTATGTTTCTTGAATTTCTAATAAATTAATGAATAATTATGAAAATTTTCGTT  
ATTTCAATTATTATTATTAATAGTTTTATTAATAGTTTTATTTCAATTAACCTCGTCAAAAATGTAGTGGAT  
TATTTCCAATCTACCTATCAACTTTTGAAGAAAACATAAAAAACTTCTTCTGTAAAAA-  
GTTGATAATTAATATTATTACAATGACTACCCTATCAAAAATTTCTAAATCTATTCAAAGACATCCTTT  
CCATCT

>ICL5

AGGTGTATATTACGGTCAATGTAGTGAAATTTGTGGTATCAATCATGGTTTTATGCCAATTGTAGTTGAA  
GCTACTTCTTTACCAAATTATGTTTCTTGAATTTCTAATAAATTAATGAATAATTATGAAAATTTTCGTT  
ATTTCAATTATTATTATTAATAGTTTTATTAATAGTTTTATTTCAATTAACCTCGTCAAAAATGTAGTGGAT  
TATTTCCAATCTACCTATCAACTTTTGAAGAAAACATAAAAAACTTCTTCTGTAAAAA-  
GTTGATAATTAATATTATTACAATGACTACCCTATCAAAAATTTCTAAATCTATTCAAAGACATCCTTT  
CCATCT

>ICL15

AGGTGTATATTACGGTCAATGTAGTGAAATTTGTGGTATCAATCATGGTTTTATGCCAATTGTAGTTGAA  
GCTACTTCTTTACCAAATTATGTTTCTTGAATTTCTAATAAATTAATGAATAATTATGAAAATTTTCGTT  
ATTTCAATTATTATTATTAATAGTTTTATTAATAGTTTTATTTCAATTAACCTCGTCAAAAATGTAGTGGAT  
TATTTCCAATCTACCTATCAACTTTTGAAGAAAACATAAAAAACTTCTTCTGTAAAAA-  
GTTGATAATTAATATTATTACAATGACTACCCTATCAAAAATTTCTAAATCTATTCAAAGACATCCTTT  
CCATCT

>ICL8

AGGTGTATATTACGGTCAATGTAGTGAAATTTGTGGTATCAATCATGGTTTTATGCCAATTGTAGTTGAA  
GCTACTTCTTTACCAAATTATGTTTCTTGAATTTCTAATAAATTAATGAATAATTATGAAAATTTTCGTT  
ATTTCAATTATTATTATTAATAGTTTTATTAATAGTTTTATTTCAATTAACCTCGTCAAAAATGTAGTGGAT  
TATTTCCAATCTACCTATCAACTTTTGAAGAAAACATAAAAAACTTCTTCTGTAAAAA-  
GTTGATAATTAATATTATTACAATGACTACCCTATCAAAAATTTCTAAATCTATTCAAAGACATCCTTT  
CCATCT

>ICL9

AGGTGTATATTACGGTCAATGTAGTGAAATTTGTGGTATCAATCATGGTTTTATGCCAATTGTAGTTGAA  
GCTACTTCTTTACCAAATTATGTTTCTTGAATTTCTAATAAATTAATGAATAATTATGAAAATTTTCGTT  
ATTTCAATTATTATTATTAATAGTTTTATTAATAGTTTTATTTCAATTAACCTCGTCAAAAATGTAGTGGAT  
TATTTCCAATCTACCTATCAACTTTTGAAGAAAACATAAAAAACTTCTTCTGTAAAAA-  
GTTGATAATTAATATTATTACAATGACTACCCTATCAAAAATTTCTAAATCTATTCAAAGACATCCTTT  
CCATCT

>ICL20

AGGTGTATATTACGGTCAATGTAGTGAAATTTGTGGTATCAATCATGGTTTTATGCCAATTGTAGTTGAA  
GCTACTTCTTTACCAAATTATGTTTCTTGAATTTCTAATAAATTAATGAATAATTATGAAAATTTTCGTT  
ATTTCAATTATTATTATTAATAGTTTTATTAATAGTTTTATTTCAATTAACCTCGTCAAAAATGTAGTGGAT  
TATTTCCAATCTACCTATCAACTTTTGAAGAAAACATAAAAAACTTCTTCTGTAAAAA-  
GTTGATAATTAATATTATTACAATGACTACCCTATCAAAAATTTCTAAATCTATTCAAAGACATCCTTT  
CCATCT

>ICL13

AGGTGTATATTACGGTCAATGTAGTGAAATTTGTGGTATCAATCATGGTTTTATGCCAATTGTAGTTGAA  
GCTACTTCTTTACCAAATTATGTTTCTTGAATTTCTAATAAATTAATGAATAATTATGAAAATTTTCGTT  
ATTTCAATTATTATTATTAATAGTTTTATTAATAGTTTTATTTCAATTAACCTCGTCAAAAATGTAGTGGAT  
TATTTCCAATCTACCTATCAACTTTTGAAGAAAACATAAAAAACTTCTTCTGTAAAAA-  
GTTGATAATTAATATTATTACAATGACTACCCTATCAAAAATTTCTAAATCTATTCAAAGACATCCTTT  
CCATCT

>ICL17

AGGTGTATATTACGGTCAATGTAGTGAAATTTGTGGTATCAATCATGGTTTTATGCCAATTGTAGTTGAA  
GCTACTTCTTTACCAAATTATGTTTCTTGAATTTCTAATAAATTAATGAATAATTATGAAAATTTTCGTT  
ATTTCAATTATTATTATTAATAGTTTTATTAATAGTTTTATTTCAATTAACCTCGTCAAAATGTAGTGGAT  
TATTTCCAATCTACCTATCAACTTTTGAAGAAAACATAAAAAACTTCTTCTGTAAAAA-  
GTTGATAATTAATATTATTACAATGACTACCCTATCAAAAATTTCTAAATCTATTCAAAGACATCCTTT  
CCATCT

>ICL2

AGGTGTATATTACGGTCAATGTAGTGAAATTTGTGGTATCAATCATGGTTTTATGCCAATTGTAGTTGAA  
GCTACTTCTTTACCAAATTATGTTTCTTGAATTTCTAATAAATTAATGAATAATTATGAAAATTTTCGTT  
ATTTCAATTATTATTATTAATAGTTTTATTAATAGTTTTATTTCAATTAACCTCGTCAAAATGTAGTGGAT  
TATTTCCAATCTACCTATCAACTTTTGAAGAAAACATAAAAAACTTCTTCTGTAAAAA-  
GTTGATAATTAATATTATTACAATGACTACCCTATCAAAAATTTCTAAATCTATTCAAAGACATCCTTT  
CCATCT

>ICL21

AGGTGTATATTACGGTCAATGTAGTGAAATTTGTGGTATCAATCATGGTTTTATGCCAATTGTAGTTGAA  
GCTACTTCTTTACCAAATTATGTTTCTTGAATTTCTAATAAATTAATGAATAATTATGAAAATTTTCGTT  
ATTTCAATTATTATTATTAATAGTTTTATTAATAGTTTTATTTCAATTAACCTCGTCAAAATGTAGTGGAT  
TATTTCCAATCTACCTATCAACTTTTGAAGAAAACATAAAAAACTTCTTCTGTAAAAA-  
GTTGATAATTAATATTATTACAATGACTACCCTATCAAAAATTTCTAAATCTATTCAAAGACATCCTTT  
CCATCT

>ICL3

AGGTGTATATTACGGTCAATGTAGTGAAATTTGTGGTATCAATCATGGTTTTATGCCAATTGTAGTTGAA  
GCTACTTCTTTACCAAATTATGTTTCTTGAATTTCTAATAAATTAATGAATAATTATGAAAATTTTCGTT  
ATTTCAATTATTATTATTAATAGTTTTATTAATAGTTTTATTTCAATTAACCTCGTCAAAATGTAGTGGAT  
TATTTCCAATCTACCTATCAACTTTTGAAGAAAACATAAAAAACTTCTTCTGTAAAAA-  
GTTGATAATTAATATTATTACAATGACTACCCTATCAAAAATTTCTAAATCTATTCAAAGACATCCTTT  
CCATCT

>ICL7

AGGTGTATATTACGGTCAATGTAGTGAAATTTGTGGTATCAATCATGGTTTTATGCCAATTGTAGTTGAA  
GCTACTTCTTTACCAAATTATGTTTCTTGAATTTCTAATAAATTAATGAATAATTATGAAAATTTTCGTT  
ATTTCAATTATTATTATTAATAGTTTTATTAATAGTTTTATTTCAATTAACCTCGTCAAAATGTAGTGGAT  
TATTTCCAATCTACCTATCAACTTTTGAAGAAAACATAAAAAACTTCTTCTGTAAAAA-  
GTTGATAATTAATATTATTACAATGACTACCCTATCAAAAATTTCTAAATCTATTCAAAGACATCCTTT  
CCATCT

>ICL12

AGGTGTATATTACGGTCAATGTAGTGAAATTTGTGGTATCAATCATGGTTTTATGCCAATTGTAGTTGAA  
GCTACTTCTTTACCAAATTATGTTTCTTGAATTTCTAATAAATTAATGAATAATTATGAAAATTTTCGTT  
ATTTCAATTATTATTATTAATAGTTTTATTAATAGTTTTATTTCAATTAACCTCGTCAAAATGTAGTGGAT  
TATTTCCAATCTACCTATCAACTTTTGAAGAAAACATAAAAAACTTCTTCTGTAAAAA-  
GTTGATAATTAATATTATTACAATGACTACCCTATCAAAAATTTCTAAATCTATTCAAAGACATCCTTT  
CCATCT

>ICL23

AGGTGTATATTACGGTCAATGTAGTGAAATTTGTGGTATCAATCATGGTTTTATGCCAATTGTAGTTGAA  
GCTACTTCTTTACCAAATTATGTTTCTTGAATTTCTAATAAATTAATGAATAATTATGAAAATTTTCGTT  
ATTTCAATTATTATTATTAATAGTTTTATTAATAGTTTTATTTCAATTAACCTCGTCAAAATGTAGTGGAT  
TATTTCCAATCTACCTATCAACTTTTGAAGAAAACATAAAAAACTTCTTCTGTAAAAA-  
GTTGATAATTAATATTATTACAATGACTACCCTATCAAAAATTTCTAAATCTATTCAAAGACATCCTTT  
CCATCT

>ICL4

AGGTGTATATTACGGTCAATGTAGTGAAATTTGTGGTATCAATCATGGTTTTATGCCAATTGTAGTTGAA  
GCTACTTCTTTACCAAATTATGTTTCTTGAATTTCTAATAAATTAATGAATAATTATGAAAATTTTCGTT  
ATTTCAATTATTATTATTAATAGTTTTATTAATAGTTTTATTTCAATTAACCTCGTCAAAATGTAGTGGAT  
TATTTCCAATCTACCTATCAACTTTTGAAGAAAACATAAAAAACTTCTTCTGTAAAAAAAAA-  
GTTGATAATTAATATTATTACAATGACTACCCTATCAAAAATTTCTAAATCTATTCAAAGACATCCTTT  
CCATCT

>ICL19

AGGTGTATATTACGGTCAATGTAGTGAAATTTGTGGTATCAATCATGGTTTTATGCCAATTGTAGTTGAA  
GCTACTTCTTTACCAAATTATGTTTCTTGAATTTCTAATAAATTAATGAATAATTATGAAAATTTTCGTT  
ATTTCAATTATTATTATTAATAGTTTTATTAATAGTTTTATTTCAATTAACCTCGTCAAAATGTAGTGGAT  
TATTTCCAATCTACCTATCAACTTTTGAAGAAAACATAAAAAACTTCTTCTGTAAAAAAAAA-  
GTTGATAATTAATATTATTACAATGACTACCCTATCAAAAATTTCTAAATCTATTCAAAGACATCCTTT  
CCATCT

>ICL11

AGGTGTATATTACGGTCAATGTAGTGAAATTTGTGGTATCAATCATGGTTTTATGCCAATTGTAGTTGAA  
GCTACTTCTTTACCAAATTATGTTTCTTGAATTTCTAATAAATTAATGAATAATTATGAAAATTTTCGTT  
ATTTCAATTATTATTATTAATAGTTTTATTAATAGTTTTATTTCAATTAACCTCGTCAAAATGTAGTGGAT  
TATTTCCAATCTACCTATCAACTTTTGAAGAAAACATAAAAAACTTCTTCTGTAAAAAAAAA-  
GTTGATAATTAATATTATTACAATGACTACCCTATCAAAAATTTCTAAATCTATTCAAAGACATCCTTT  
CCATCT

>FAL14

AGGTGTATATTACGGTCAATGTAGTGAAATTTGTGGTATCAATCATGGTTTTATGCCAATTGTAGTTGAA  
GCTACTTCTTTACCAAATTATGTTTCTTGAATTTCTAATAAATTAATGAATAATTATGAAAATTTTCGTT  
ATTTCAATTATTATTATTAATAGTTTTATTAATAGTTTTATTTCAATTAACCTCGTCAAAATGTAGTGGAT  
TATTTCCAATCTACCTATCAACTTTTGAAGAAAACATAAAAAACTTCTTCTGTAAAAAAAAA-  
GTTGATAATTAATATTATTACAATGACTACCCTATCAAAAATTTCTAAATCTATTCAAAGACATCCTTT  
CCATCT

>FAL2

AGGTGTATATTACGGTCAATGTAGTGAAATTTGTGGTATCAATCATGGTTTTATGCCAATTGTAGTTGAA  
GCTACTTCTTTACCAAATTATGTTTCTTGAATTTCTAATAAATTAATGAATAATTATGAAAATTTTCGTT  
ATTTCAATTATTATTATTAATAGTTTTATTAATAGTTTTATTTCAATTAACCTCGTCAAAATGTAGTGGAT  
TATTTCCAATCTACCTATCAACTTTTGAAGAAAACATAAAAAACTTCTTCTGTAAAAAAAAA-  
GTTGATAATTAATATTATTACAATGACTACCCTATCAAAAATTTCTAAATCTATTCAAAGACATCCTTT  
CCATCT

>FAL9

AGGTGTATATTACGGTCAATGTAGTGAAATTTGTGGTATCAATCATGGTTTTATGCCAATTGTAGTTGAA  
GCTACTTCTTTACCAAATTATGTTTCTTGAATTTCTAATAAATTAATGAATAATTATGAAAATTTTCGTT  
ATTTCAATTATTATTATTAATAGTTTTATTAATAGTTTTATTTCAATTAATCGTCAAAATGTAGTGGAT  
TATTTCCAATCTACCTATCAACTTTTGAAGAAAACATAAAAAACTTCTTCTGTAAAAAAAAA-  
GTTGATAATTAATATTATTACAATGACTACCCTATCAAAAATTTCTAAATCTATTCAAAGACATCCTTT  
CCATCT

>FAL7

AGGTGTATATTACGGTCAATGTAGTGAAATTTGTGGTATCAATCATGGTTTTATGCCAATTGTAGTTGAA  
GCTACTTCTTTACCAAATTATGTTTCTTGAATTTCTAATAAATTAATGAATAATTATGAAAATTTTCGTT  
ATTTCAATTATTATTATTAATAGTTTTATTAATAGTTTTATTTCAATTAACCTCGTCAAAATGTAGTGGAT  
TATTTCCAATCTACCTATCAACTTTTGAAGAAAACATAAAAAACTTCTTCTGTAAAAAAAAAAGTTGAT  
AATTAATATTATTACAATGACTACCCTATCAAAAATTTCTAAATCTATTCAAAGACATCCTTTCCATCT

>FAL10

AGGTGTATATTACGGTCAATGTAGTGAAATTTGTGGTATCAATCATGGTTTTATGCCAATTGTAGTTGAA  
GCTACTTCTTTACCAAATTATGTTTCTTGAATTTCTAATAAATTAATGAATAATTATGAAAATTTTCGTT

ATTTCAATTATTATTATTAATAGTTTTATTAATAGTTTTATTTCAATTAACCTCGTCAAAAATGTAGTGGAT  
TATTTCCAATCTACCTATCAACTTTTGAAGAAAACATAAAAAACTTCTTCTGTAAAAA-  
GTTGATAATTAATATTATTACAATGACTACCCTATCAAAAATTTCTAAATCTATTCAAAGACATCCTTT  
CCATCT

>FAL3

AGGTGTATATTACGGTCAATGTAGTGAAATTTGTGGTATCAATCATGGTTTTATGCCAATTGTAGTTGAA  
GCTACTTCTTTACCAAATTATGTTTCTTGAATTTCTAATAAATTAATGAATAATTATGAAAATTTGTT  
ATTTCAATTATTATTATTAATAGTTTTATTAATAGTTTTATTTCAATTAACCTCGTCAAAAATGTAGTGGAT  
TATTTCCAATCTACCTATCAACTTTTGAAGAAAACATAAAAAACTTCTTCTGTAAAAA-  
GTTGATAATTAATATTATTACAATGACTACCCTATCAAAAATTTCTAAATCTATTCAAAGACATCCTTT  
CCATCT

>FAL8

AGGTGTATATTACGGTCAATGTAGTGAAATTTGTGGTATCAATCATGGTTTTATGCCAATTGTAGTTGAA  
GCTACTTCTTTACCAAATTATGTTTCTTGAATTTCTAATAAATTAATGAATAATTATGAAAATTTGTT  
ATTTCAATTATTATTATTAATAGTTTTATTAATAGTTTTATTTCAATTAACCTCGTCAAAAATGTAGTGGAT  
TATTTCCAATCTACCTATCAACTTTTGAAGAAAACATAAAAAACTTCTTCTGTAAAAA-  
GTTGATAATTAATATTATTACAATGACTACCCTATCAAAAATTTCTAAATCTATTCAAAGACATCCTTT  
CCATCT

>FAL16

AGGTGTATATTACGGTCAATGTAGTGAAATTTGTGGTATCAATCATGGTTTTATGCCAATTGTAGTTGAA  
GCTACTTCTTTACCAAATTATGTTTCTTGAATTTCTAATAAATTAATGAATAATTATGAAAATTTGTT  
ATTTCAATTATTATTATTAATAGTTTTATTAATAGTTTTATTTCAATTAACCTCGTCAAAAATGTAGTGGAT  
TATTTCCAATCTACCTATCAACTTTTGAAGAAAACATAAAAAACTTCTTCTGTAAAAA-  
GTTGATAATTAATATTATTACAATGACTACCCTATCAAAAATTTCTAAATCTATTCAAAGACATCCTTT  
CCATCT

>FAL5

AGGTGTATATTACGGTCAATGTAGTGAAATTTGTGGTATCAATCATGGTTTTATGCCAATTGTAGTTGAA  
GCTACTTCTTTACCAAATTATGTTTCTTGAATTTCTAATAAATTAATGAATAATTATGAAAATTTGTT  
ATTTCAATTATTATTATTAATAGTTTTATTAATAGTTTTATTTCAATTAACCTCGTCAAAAATGTAGTGGAT  
TATTTCCAATCTACCTATCAACTTTTGAAGAAAACATAAAAAACTTCTTCTGTAAAAA-  
GTTGATAATTAATATTATTACAATGACTACCCTATCAAAAATTTCTAAATCTATTCAAAGACATCCTTT  
CCATCT

>FAL11

AGGTGTATATTACGGTCAATGTAGTGAAATTTGTGGTATCAATCATGGTTTTATGCCAATTGTAGTTGAA  
GCTACTTCTTTACCAAATTATGTTTCTTGAATTTCTAATAAATTAATGAATAATTATGAAAATTTGTT  
ATTTCAATTATTATTATTAATAGTTTTATTAATAGTTTTATTTCAATTAATCGTCAAAAATGTAGTGGAT  
TATTTCCAATCTACCTATCAACTTTTGAAGAAAACATAAAAAACTTCTTCTGTAAAAA-  
GTTGATAATTAATATTATTACAATGACTACCCTATCAAAAATTTCTAAATCTATTCAAAGACATCCTTT  
CCATCT

>FAL12

AGGTGTATATTACGGTCAATGTAGTGAAATTTGTGGTATCAATCATGGTTTTATGCCAATTGTAGTTGAA  
GCTACTTCTTTACCAAATTATGTTTCTTGAATTTCTAATAAATTAATGAATAATTATGAAAATTTGTT  
ATTTCAATTATTATTATTAATAGTTTTATTAATAGTTTTATTTCAATTAACCTCGTCAAAAATGTAGTGGAT  
TATTTCCAATCTACCTATCAACTTTTGAAGAAAACATAAAAAACTTCTTCTGTAAAAA-  
GTTGATAATTAATATTATTACAATGACTACCCTATCAAAAATTTCTAAATCTATTCAAAGACATCCTTT  
CCATCT

>FAL13

AGGTGTATATTACGGTCAATGTAGTGAAATTTGTGGTATCAATCATGGTTTTATGCCAATTGTAGTTGAA  
GCTACTTCTTTACCAAATTATGTTTCTTGAATTTCTAATAAATTAATGAATAATTATGAAAATTTGTT  
ATTTCAATTATTATTATTAATAGTTTTATTAATAGTTTTATTTCAATTAACCTCGTCAAAAATGTAGTGGAT





TATTTTCAATCAACTTATCAACTTTTGAATAAAAACCAAAAAAAGCTTTTCTTCAAAAAA-  
GTTGATAATTAATGTTATTAAAATGACTACCTTATCAAAGTCTCTAAATCTATTCAAAGACATCCTT  
CCATCT

>HAN4

AGGTATATATTATGGTCAGTGTAGTGAAATTTGTGGTATTAATCATGGTTTTATGCCAATTGTAGTTGAA  
GCTACTTCTTTACCAAATTATGTTTCCTGAATTTCTAACAACTAAATGAATAGTTATGAAAATTCGTT  
ATTTCAATTAATATTAATATTAATTTTATTCTTGTTCTTATTTTCGATTAATCGTCAAAATGTAGTGGAT  
TATTTTCAATCAACTTATCAACTTTTGAATAAAAACCAAAAAAAGCTTTTCTTCAAAAAA-  
GTTGATAATTAATGTTATTAAAATGACTACCTTATCAAAGTCTCTAAATCTATTCAAAGACATCCTT  
CCATCT

>HAN6

AGGTATATATTATGGTCAGTGTAGTGAAATTTGTGGTATTAATCATGGTTTTATGCCAATTGTAGTTGAA  
GCTACTTCTTTACCAAATTATGTTTCCTGAATTTCTAACAACTAAATGAATAGTTATGAAAATTCGTT  
ATTTCAATTAATATTAATATTAATTTTATTCTTGTTCTTATTTTCGATTAATCGTCAAAATGTAGTGGAT  
TATTTTCAATCAACTTATCAACTTTTGAATAAAAACCAAAAAAAGCTTTTCTTCAAAAAA-  
GTTGATAATTAATGTTATTAAAATGACTACCTTATCAAAGTCTCTAAATCTATTCAAAGACATCCTT  
CCATCT

>HAN13

AGGTATATATTATGGTCAGTGTAGTGAAATTTGTGGTATTAATCATGGTTTTATGCCAATTGTAGTTGAA  
GCTACTTCTTTACCAAATTATGTTTCCTGAATTTCTAACAACTAAATGAATAGTTATGAAAATTCGTT  
ATTTCAATTAATATTAATATTAATTTTATTCTTGTTCTTATTTTCGATTAATCGTCAAAATGTAGTGGAT  
TATTTTCAATCAACTTATCAACTTTTGAATAAAAACCAAAAAAAGCTTTTCTTCAAAAAA-  
GTTGATAATTAATGTTATTAAAATGACTACCTTATCAAAGTCTCTAAATCTATTCAAAGACATCCTT  
CCATCT

>HAN17

AGGTATATATTATGGTCAGTGTAGTGAAATTTGTGGTATTAATCATGGTTTTATGCCAATTGTAGTTGAA  
GCTACTTCTTTACCAAATTATGTTTCCTGAATTTCTAACAACTAAATGAATAGTTATGAAAATTCGTT  
ATTTCAATTAATATTAATATTAATTTTATTCTTGTTCTTATTTTCGATTAATCGTCAAAATGTAGTGGAT  
TATTTTCAATCAACTTATCAACTTTTGAATAAAAACCAAAAAAAGCTTTTCTTCAAAAAA-  
GTTGATAATTAATGTTATTAAAATGACTACCTTATCAAAGTCTCTAAATCTATTCAAAGACATCCTT  
CCATCT

>HAN7

AGGTATATATTATGGTCAGTGTAGTGAAATTTGTGGTATTAATCATGGTTTTATGCCAATTGTAGTTGAA  
GCTACTTCTTTACCAAATTATGTTTCCTGAATTTCTAACAACTAAATGAATAGTTATGAAAATTCGTT  
ATTTCAATTAATATTAATATTAATTTTATTCTTGTTCTTATTTTCGATTAATCGTCAAAATGTAGTGGAT  
TATTTTCAATCAACTTATCAACTTTTGAATAAAAACCAAAAAAAGCTTTTCTTCAAAAAA-  
GTTGATAATTAATGTTATTAAAATGACTACCTTATCAAAGTCTCTAAATCTATTCAAAGACATCCTT  
CCATCT

>HAN24

AGGTATATATTATGGTCAGTGTAGTGAAATTTGTGGTATTAATCATGGTTTTATGCCAATTGTAGTTGAA  
GCTACTTCTTTACCAAATTATGTTTCCTGAATTTCTAACAACTAAATGAATAGTTATGAAAATTCGTT  
ATTTCAATTAATATTAATATTAATTTTATTCTTGTTCTTATTTTCGATTAATCGTCAAAATGTAGTGGAT  
TATTTTCAATCAACTTATCAACTTTTGAATAAAAACCAAAAAAAGCTTTTCTTCAAAAAA-  
GTTGATAATTAATGTTATTAAAATGACTACCTTATCAAAGTCTCTAAATCTATTCAAAGACATCCTT  
CCATCT

>HAN25

AGGTATATATTATGGTCAGTGTAGTGAAATTTGTGGTATTAATCATGGTTTTATGCCAATTGTAGTTGAA  
GCTACTTCTTTACCAAATTATGTTTCCTGAATTTCTAACAACTAAATGAATAGTTATGAAAATTCGTT  
ATTTCAATTAATATTAATATTAATTTTATTCTTGTTCTTATTTTCGATTAATCGTCAAAATGTAGTGGAT  
TATTTTCAATCAACTTATCAACTTTTGAATAAAAACCAAAAAAAGCTTTTCTTCAAAAAA-

GTTGATAATTAATGTTATTAATAATGACTACCTTATCAAAAGTCTCTAAATCTATTCAAAGACATCCTTT  
CCATCT

>HAN9

AGGTATATATTATGGTCAGTGTAGTGAAATTTGTGGTATTAATCATGGTTTTATGCCAATTGTAGTTGAA  
GCTACTTCTTTACCAAATTATGTTTCCTGAATTTCTAACAACTAAATGAATAGTTATGAAAATTCGTT  
ATTTCAATTAATATTAATATTAATTTTATTCTTGTTCTTATTTTCGATTAATCGTCAAAATGTAGTGGAT  
TATTTTCAATCAACTTATCAACTTTTGAATAAAACCAAAAAAACTTTTTCTTCAAAAAAAA-  
GTTGATAATTAATGTTATTAATAATGACTACCTTATCAAAAGTCTCTAAATCTATTCAAAGACATCCTTT  
CCATCT

>HAN14

AGGTATATATTATGGTCAGTGTAGTGAAATTTGTGGTATTAATCATGGTTTTATGCCAATTGTAGTTGAA  
GCTACTTCTTTACCAAATTATGTTTCCTGAATTTCTAACAACTAAATGAATAGTTATGAAAATTCGTT  
ATTTCAATTAATATTAATATTAATTTTATTCTTGTTCTTATTTTCGATTAATCGTCAAAATGTAGTGGAT  
TATTTTCAATCAACTTATCAACTTTTGAATAAAACCAAAAAAACTTTTTCTTCAAAAAAAA-  
GTTGATAATTAATGTTATTAATAATGACTACCTTATCAAAAGTCTCTAAATCTATTCAAAGACATCCTTT  
CCATCT

>HAN19

AGGTATATATTATGGTCAGTGTAGTGAAATTTGTGGTATTAATCATGGTTTTATGCCAATTGTAGTTGAA  
GCTACTTCTTTACCAAATTATGTTTCCTGAATTTCTAACAACTAAATGAATAGTTATGAAAATTCGTT  
ATTTCAATTAATATTAATATTAATTTTATTCTTGTTCTTATTTTCGATTAATCGTCAAAATGTAGTGGAT  
TATTTTCAATCAACTTATCAACTTTTGAATAAAACCAAAAAAACTTTTTCTTCAAAAAAAA-  
GTTGATAATTAATGTTATTAATAATGACTACCTTATCAAAAGTCTCTAAATCTATTCAAAGACATCCTTT  
CCATCT

>HAN21

AGGTATATATTATGGTCAGTGTAGTGAAATTTGTGGTATTAATCATGGTTTTATGCCAATTGTAGTTGAA  
GCTACTTCTTTACCAAATTATGTTTCCTGAATTTCTAACAACTAAATGAATAGTTATGAAAATTCGTT  
ATTTCAATTAATATTAATATTAATTTTATTCTTGTTCTTATTTTCGATTAATCGTCAAAATGTAGTGGAT  
TATTTTCAATCAACTTATCAACTTTTGAATAAAACCAAAAAAACTTTTTCTTCAAAAAAAA-  
GTTGATAATTAATGTTATTAATAATGACTACCTTATCAAAAGTCTCTAAATCTATTCAAAGACATCCTTT  
CCATCT

>HAN23

AGGTATATATTATGGTCAGTGTAGTGAAATTTGTGGTATTAATCATGGTTTTATGCCAATTGTAGTTGAA  
GCTACTTCTTTACCAAATTATGTTTCCTGAATTTCTAACAACTAAATGAATAGTTATGAAAATTCGTT  
ATTTCAATTAATATTAATATTAATTTTATTCTTGTTCTTATTTTCGATTAATCGTCAAAATGTAGTGGAT  
TATTTTCAATCAACTTATCAACTTTTGAATAAAACCAAAAAAACTTTTTCTTCAAAAAAAA-  
GTTGATAATTAATGTTATTAATAATGACTACCTTATCAAAAGTCTCTAAATCTATTCAAAGACATCCTTT  
CCATCT

>PRA4

AGGTATATATTATGGTCAGTGTAGTGAAATTTGTGGTATTAATCATGGTTTTATGCCAATTGTAGTTGAA  
GCTACTTCTTTACCAAATTATGTTTCCTGAATTTCTAACAACTAAATGAATAGTTATGAAAATTCGTT  
ATTTCAATTAATATTAATATTAATTTTATTCTTGTTCTTATTTTCGATTAATCGTCAAAATGTAGTGGAT  
TATTTTCAATCAACTTATCAACTTTTGAATAAAACCAAAAAAACTTTTTCTTCAAAAAAAA-  
GTTGATAATTAATGTTATTAATAATGACTACCTTATCAAAAGTCTCTAAATCTATTCAAAGACATCCTTT  
CCATCT

>PRA2

AGGTATATATTATGGTCAGTGTAGTGAAATTTGTGGTATTAATCATGGTTTTATGCCAATTGTAGTTGAA  
GCTACTTCTTTACCAAATTATGTTTCCTGAATTTCTAACAACTAAATGAATAGTTATGAAAATTCGTT  
ATTTCAATTAATATTAATATTAATTTTATTCTTGTTCTTATTTTCGATTAATCGTCAAAATGTAGTGGAT  
TATTTTCAATCAACTTATCAACTTTTGAATAAAACCAAAAAAACTTTTTCTTCAAAAAAAA-  
GTTGATAATTAATGTTATTAATAATGACTACCTTATCAAAAGTCTCTAAATCTATTCAAAGACATCCTTT

CCATCT

>PRA7

AGGTATATATTATGGTCAGTGTAGTGAAATTTGTGGTATTAATCATGGTTTTATGCCAATTGTAGTTGAA  
GCTACTTCTTTACCAAATTATGTTTCCTGAATTTCTAACAACTAAATGAATAGTTATGAAAATTTTCGTT  
ATTTCAATTAATATTAATATTAATTTTATTCTTGTTCTTATTTTCGATTAATCGTCAAAATGTAGTGGAT  
TATTTTCAATCAACTTATCAACTTTTGAATAAAACCAAAAAAACTTTTTCTTCAAAAAAAA-  
GTTGATAATTAATGTTATTAAAATGACTACCTTATCAAAGTCTCTAAATCTATTCAAAGACATCCTTT  
CCATCT

>PRA20

AGGTATATATTATGGTCAGTGTAGTGAAATTTGTGGTATTAATCATGGTTTTATGCCAATTGTAGTTGAA  
GCTACTTCTTTACCAAATTATGTTTCCTGAATTTCTAACAACTAAATGAATAGTTATGAAAATTTTCGTT  
ATTTCAATTAATATTAATATTAATTTTATTCTTGTTCTTATTTTCGATTAATCGTCAAAATGTAGTGGAT  
TATTTTCAATCAACTTATCAACTTTTGAATAAAACCAAAAAAACTTTTTCTTCAAAAAAAA-  
GTTGATAATTAATGTTATTAAAATGACTACCTTATCAAAGTCTCTAAATCTATTCAAAGACATCCTTT  
CCATCT

>PRA13

AGGTATATATTATGGTCAGTGTAGTGAAATTTGTGGTATTAATCATGGTTTTATGCCAATTGTAGTTGAA  
GCTACTTCTTTACCAAATTATGTTTCCTGAATTTCTAACAACTAAATGAATAGTTATGAAAATTTTCGTT  
ATTTCAATTAATATTAATATTAATTTTATTCTTGTTCTTATTTTCGATTAATCGTCAAAATGTAGTGGAT  
TATTTTCAATCAACTTATCAACTTTTGAATAAAACCAAAAAAACTTTTTCTTCAAAAAAAA-  
GTTGATAATTAATGTTATTAAAATGACTACCTTATCAAAGTCTCTAAATCTATTCAAAGACATCCTTT  
CCATCT

>PRA12

AGGTATATATTATGGTCAGTGTAGTGAAATTTGTGGTATTAATCATGGTTTTATGCCAATTGTAGTTGAA  
GCTACTTCTTTACCAAATTATGTTTCCTGAATTTCTAACAACTAAATGAATAGTTATGAAAATTTTCGTT  
ATTTCAATTAATATTAATATTAATTTTATTCTTGTTCTTATTTTCGATTAATCGTCAAAATGTAGTGGAT  
TATTTTCAATCAACTTATCAACTTTTGAATAAAACCAAAAAAACTTTTTCTTCAAAAAAAA-  
GTTGATAATTAATGTTATTAAAATGACTACCTTATCAAAGTCTCTAAATCTATTCAAAGACATCCTTT  
CCATCT

>PRA11

AGGTATATATTATGGTCAGTGTAGTGAAATTTGTGGTATTAATCATGGTTTTATGCCAATTGTAGTTGAA  
GCTACTTCTTTACCAAATTATGTTTCCTGAATTTCTAACAACTAAATGAATAGTTATGAAAATTTTCGTT  
ATTTCAATTAATATTAATATTAATTTTATTCTTGTTCTTATTTTCGATTAATCGTCAAAATGTAGTGGAT  
TATTTTCAATCAACTTATCAACTTTTGAATAAAACCAAAAAAACTTTTTCTTCAAAAAAAA-  
GTTGATAATTAATGTTATTAAAATGACTACCTTATCAAAGTCTCTAAATCTATTCAAAGACATCCTTT  
CCATCT

>PRA1

AGGTATATATTATGGTCAGTGTAGTGAAATTTGTGGTATTAATCATGGTTTTATGCCAATTGTAGTTGAA  
GCTACTTCTTTACCAAATTATGTTTCCTGAATTTCTAACAACTAAATGAATAGTTATGAAAATTTTCGTT  
ATTTCAATTAATATTAATATTAATTTTATTCTTGTTCTTATTTTCGATTAATCGTCAAAATGTAGTGGAT  
TATTTTCAATCAACTTATCAACTTTTGAATAAAACCAAAAAAACTTTTTCTTCAAAAAAAA-  
GTTGATAATTAATGTTATTAAAATGACTACCTTATCAAAGTCTCTAAATCTATTCAAAGACATCCTTT  
CCATCT

>PRA5

AGGTATATATTATGGTCAGTGTAGTGAAATTTGTGGTATTAATCATGGTTTTATGCCAATTGTAGTTGAA  
GCTACTTCTTTACCAAATTATGTTTCCTGAATTTCTAACAACTAAATGAATAGTTATGAAAATTTTCGTT  
ATTTCAATTAATATTAATATTAATTTTATTCTTGTTCTTATTTTCGATTAATCGTCAAAATGTAGTGGAT  
TATTTTCAATCAACTTATCAACTTTTGAATAAAACCAAAAAAACTTTTTCTTCAAAAAAAA-  
GTTGATAATTAATGTTATTAAAATGACTACCTTATCAAAGTCTCTAAATCTATTCAAAGACATCCTTT  
CCATCT

>PRA3

AGGTATATATTATGGTCAGTGTAGTGAAATTTGTGGTATTAATCATGGTTTTATGCCAATTGTAGTTGAA  
GCTACTTCTTTACCAAATTATGTTTCCTGAATTTCTAACAACTAAATGAATAGTTATGAAAATTTTCGTT  
ATTTCAATTAATATTAATATTAATTTTATTCTTGTTCTTATTTTCGATTAATCGTCAAAATGTAGTGGAT  
TATTTTCAATCAACTTATCAACTTTTGAATAAAACCAAAAAAACTTTTTCTTCAAAAAAAA-  
GTTGATAATTAATGTTATTAAAATGACTACCTTATCAAAGTCTCTAAATCTATTCAAAGACATCCTTT  
CCATCT

>PRA9

AGGTATATATTATGGTCAGTGTAGTGAAATTTGTGGTATTAATCATGGTTTTATGCCAATTGTAGTTGAA  
GCTACTTCTTTACCAAATTATGTTTCCTGAATTTCTAACAACTAAATGAATAGTTATGAAAATTTTCGTT  
ATTTCAATTAATATTAATATTAATTTTATTCTTGTTCTTATTTTCGATTAATCGTCAAAATGTAGTGGAT  
TATTTTCAATCAACTTATCAACTTTTGAATAAAACCAAAAAAACTTTTTCTTCAAAAAAAA-  
GTTGATAATTAATGTTATTAAAATGACTACCTTATCAAAGTCTCTAAATCTATTCAAAGACATCCTTT  
CCATCT

>PRA10

AGGTATATATTATGGTCAGTGTAGTGAAATTTGTGGTATTAATCATGGTTTTATGCCAATTGTAGTTGAA  
GCTACTTCTTTACCAAATTATGTTTCCTGAATTTCTAACAACTAAATGAATAGTTATGAAAATTTTCGTT  
ATTTCAATTAATATTAATATTAATTTTATTCTTGTTCTTATTTTCGATTAATCGTCAAAATGTAGTGGAT  
TATTTTCAATCAACTTATCAACTTTTGAATAAAACCAAAAAAACTTTTTCTTCAAAAAAAA-  
GTTGATAATTAATGTTATTAAAATGACTACCTTATCAAAGTCTCTAAATCTATTCAAAGACATCCTTT  
CCATCT

>ORK2

AGGTATATATTATGGTCAGTGTAGTGAAATTTGTGGTATTAATCATGGTTTTATGCCAATTGTAGTTGAA  
GCTACTTCTTTACCAAATTATGTTTCCTGAATTTCTAACAACTAAATGAATAGTTATGAAAATTTTCGTT  
ATTTCAATTAATATTAATATTAATTTTATTCTTGTTCTTATTTTCGATTAATCGTCAAAATGTAGTGGAT  
TATTTTCAATCAACTTATCAACTTTTGAATAAAACCAAAAAAACTTTTTCTTCAAAAAAAA-  
GTTGATAATTAATGTTATTAAAATGACTACCTTATCAAAGTCTCTAAATCTATTCAAAGACATCCTTT  
CCATCT

>ORK3

AGGTATATATTATGGTCAGTGTAGTGAAATTTGTGGTATTAATCATGGTTTTATGCCAATTGTAGTTGAA  
GCTACTTCTTTACCAAATTATGTTTCCTGAATTTCTAACAACTAAATGAATAGTTATGAAAATTTTCGTT  
ATTTCAATTAATATTAATATTAATTTTATTCTTGTTCTTATTTTCGATTAATCGTCAAAATGTAGTGGAT  
TATTTTCAATCAACTTATCAACTTTTGAATAAAACCAAAAAAACTTTTTCTTCAAAAAAAA-  
GTTGATAATTAATGTTATTAAAATGACTACCTTATCAAAGTCTCTAAATCTATTCAAAGACATCCTTT  
CCATCT

>ORK1

AGGTATATATTATGGTCAGTGTAGTGAAATTTGTGGTATTAATCATGGTTTTATGCCAATTGTAGTTGAA  
GCTACTTCTTTACCAAATTATGTTTCCTGAATTTCTAACAACTAAATGAATAGTTATGAAAATTTTCGTT  
ATTTCAATTAATATTAATATTAATTTTATTCTTGTTCTTATTTTCGATTAATCGTCAAAATGTAGTGGAT  
TATTTTCAATCAACTTATCAACTTTTGAATAAAACCAAAAAAACTTTTTCTTCAAAAAAAA-  
GTTGATAATTAATGTTATTAAAATGACTACCTTATCAAAGTCTCTAAATCTATTCAAAGACATCCTTT  
CCATCT

>ORK4

AGGTATATATTATGGTCAGTGTAGTGAAATTTGTGGTATTAATCATGGTTTTATGCCAATTGTAGTTGAA  
GCTACTTCTTTACCAAATTATGTTTCCTGAATTTCTAACAACTAAATGAATAGTTATGAAAATTTTCGTT  
ATTTCAATTAATATTAATATTAATTTTATTCTTGTTCTTATTTTCGATTAATCGTCAAAATGTAGTGGAT  
TATTTTCAATCAACTTATCAACTTTTGAATAAAACCAAAAAAACTTTTTCTTCAAAAAAAA-  
GTTGATAATTAATGTTATTAAAATGACTACCTTATCAAAGTCTCTAAATCTATTCAAAGACATCCTTT  
CCATCT

>ORK10



GCTACTTCTTTACCAAATTATGTTTCCTGAATTTCTAACAACTAAATGAATAGTTATGAAAATTTTCGTT  
ATTTCAATTAATATTAATATTAATTTTTATTCTTGTTCTTATTTTCGATTAATCGTCAAAATGTAGTGGAT  
TATTTTCAATCAACTTATCAACTTTTGAATAAAACCAAAAAAACTTTTTCTTCAAAAAAAA-  
GTTGATAATTAATGTTATTAAAATGACTACCTTATCAAAAGTCTCTAAATCTATTCAAAGACATCCTTT  
CCATCT

>AIT8

AGGTATATATTATGGTCAGTGTAGTGAAATTTGTGGTATTAATCATGGTTTTATGCCAATTGTAGTTGAA  
GCTACTTCTTTACCAAATTATGTTTCCTGAATTTCTAACAACTAAATGAATAGTTATGAAAATTTTCGTT  
ATTTCAATTAATATTAATATTAATTTTTATTCTTGTTCTTATTTTCGATTAATCGTCAAAATGTAGTGGAT  
TATTTTCAATCAACTTATCAACTTTTGAATAAAACCAAAAAAACTTTTTCTTCAAAAAAAA-  
GTTGATAATTAATGTTATTAAAATGACTACCTTATCAAAAGTCTCTAAATCTATTCAAAGACATCCTTT  
CCATCT

>AIT10

AGGTATATATTATGGTCAGTGTAGTGAAATTTGTGGTATTAATCATGGTTTTATGCCAATTGTAGTTGAA  
GCTACTTCTTTACCAAATTATGTTTCCTGAATTTCTAACAACTAAATGAATAGTTATGAAAATTTTCGTT  
ATTTCAATTAATATTAATATTAATTTTTATTCTTGTTCTTATTTTCGATTAATCGTCAAAATGTAGTGGAT  
TATTTTCAATCAACTTATCAACTTTTGAATAAAACCAAAAAAACTTTTTCTTCAAAAAAAA-  
GTTGATAATTAATGTTATTAAAATGACTACCTTATCAAAAGTCTCTAAATCTATTCAAAGACATCCTTT  
CCATCT

>OHI\_0015

AGGTATATATTATGGTCAGTGTAGTGAAATTTGTGGTATTAATCATGGTTTTATGCCAATTGTAGTTGAA  
GCTACTTCTTTACCAAATTATGTTTCCTGAATTTCTAACAACTAAATGAATAGTTATGAAAATTTTCGTT  
ATTTCAATTAATATTAATATTAATTTTTATTCTTGTTCTTATTTTCGATTAATCGTCAAAATGTAGTGGAT  
TATTTTCAATCAACTTATCAACTTTTGAATAAAACCAAAAAAACTTTTTCTTCAAAAAAAA-  
GTTGATAATTAATGTTATTAAAATGACTACCTTATCAAAAGTCTCTAAATCTATTCAAAGACATCCTTT  
CCATCT

>OHI\_0095

AGGTATATATTATGGTCAGTGTAGTGAAATTTGTGGTATTAATCATGGTTTTATGCCAATTGTAGTTGAA  
GCTACTTCTTTACCAAATTATGTTTCCTGAATTTCTAACAACTAAATGAATAGTTATGAAAATTTTCGTT  
ATTTCAATTAATATTAATATTAATTTTTATTCTTGTTCTTATTTTCGATTAATCGTCAAAATGTAGTGGAT  
TATTTTCAATCAACTTATCAACTTTTGAATAAAACCAAAAAAACTTTTTCTTCAAAAAAAA-  
GTTGATAATTAATGTTATTAAAATGACTACCTTATCAAAAGTCTCTAAATCTATTCAAAGACATCCTTT  
CCATCT

>OHI\_0096

AGGTATATATTATGGTCAGTGTAGTGAAATTTGTGGTATTAATCATGGTTTTATGCCAATTGTAGTTGAA  
GCTACTTCTTTACCAAATTATGTTTCCTGAATTTCTAACAACTAAATGAATAGTTATGAAAATTTTCGTT  
ATTTCAATTAATATTAATATTAATTTTTATTCTTGTTCTTATTTTCGATTAATCGTCAAAATGTAGTGGAT  
TATTTTCAATCAACTTATCAACTTTTGAATAAAACCAAAAAAACTTTTTCTTCAAAAAAAA-  
GTTGATAATTAATGTTATTAAAATGACTACCTTATCAAAAGTCTCTAAATCTATTCAAAGACATCCTTT  
CCATCT

>OHI\_0103

AGGTATATATTATGGTCAGTGTAGTGAAATTTGTGGTATTAATCATGGTTTTATGCCAATTGTAGTTGAA  
GCTACTTCTTTACCAAATTATGTTTCCTGAATTTCTAACAACTAAATGAATAGTTATGAAAATTTTCGTT  
ATTTCAATTAATATTAATATTAATTTTTATTCTTGTTCTTATTTTCGATTAATCGTCAAAATGTAGTGGAT  
TATTTTCAATCAACTTATCAACTTTTGAATAAAACCAAAAAAACTTTTTCTTCAAAAAAAA-  
GTTGATAATTAATGTTATTAAAATGACTACCTTATCAAAAGTCTCTAAATCTATTCAAAGACATCCTTT  
CCATCT

>OHI\_0144

AGGTATATATTATGGTCAGTGTAGTGAAATTTGTGGTATTAATCATGGTTTTATGCCAATTGTAGTTGAA  
GCTACTTCTTTACCAAATTATGTTTCCTGAATTTCTAACAACTAAATGAATAGTTATGAAAATTTTCGTT

ATTTCAATTAATATTAATATTAATTTTTATTCTTGTTCTTATTTTCGATTAATCGTCAAAAATGTAGTGGAT  
TATTTTCAATCAACTTATCAACTTTTGAATAAAAACCAAAAAAACTTTTTCTTCAAAAAAAA-  
GTTGATAATTAATGTTATTAAAATGACTACCTTATCAAAAGTCTCTAAATCTATTCAAAGACATCCTTT  
CCATCT

>OHI\_0146

AGGTATATATTATGGTCAGTGTAGTGAAATTTGTGGTATTAATCATGGTTTTATGCCAATTGTAGTTGAA  
GCTACTTCTTTACCAAATTATGTTTCCTGAATTTCTAACAACTAAATGAATAGTTATGAAAATTTTCGTT  
ATTTCAATTAATATTAATATTAATTTTTATTCTTGTTCTTATTTTCGATTAATCGTCAAAAATGTAGTGGAT  
TATTTTCAATCAACTTATCAACTTTTGAATAAAAACCAAAAAAACTTTTTCTTCAAAAAAAA-  
GTTGATAATTAATGTTATTAAAATGACTACCTTATCAAAAGTCTCTAAATCTATTCAAAGACATCCTTT  
CCATCT

>OHI\_0147

AGGTATATATTATGGTCAGTGTAGTGAAATTTGTGGTATTAATCATGGTTTTATGCCAATTGTAGTTGAA  
GCTACTTCTTTACCAAATTATGTTTCCTGAATTTCTAACAACTAAATGAATAGTTATGAAAATTTTCGTT  
ATTTCAATTAATATTAATATTAATTTTTATTCTTGTTCTTATTTTCGATTAATCGTCAAAAATGTAGTGGAT  
TATTTTCAATCAACTTATCAACTTTTGAATAAAAACCAAAAAAACTTTTTCTTCAAAAAAAA-  
GTTGATAATTAATGTTATTAAAATGACTACCTTATCAAAAGTCTCTAAATCTATTCAAAGACATCCTTT  
CCATCT

>OHI\_0154

AGGTATATATTATGGTCAGTGTAGTGAAATTTGTGGTATTAATCATGGTTTTATGCCAATTGTAGTTGAA  
GCTACTTCTTTACCAAATTATGTTTCCTGAATTTCTAACAACTAAATGAATAGTTATGAAAATTTTCGTT  
ATTTCAATTAATATTAATATTAATTTTTATTCTTGTTCTTATTTTCGATTAATCGTCAAAAATGTAGTGGAT  
TATTTTCAATCAACTTATCAACTTTTGAATAAAAACCAAAAAAACTTTTTCTTCAAAAAAAA-  
GTTGATAATTAATGTTATTAAAATGACTACCTTATCAAAAGTCTCTAAATCTATTCAAAGACATCCTTT  
CCATCT

>OHI\_0188

AGGTATATATTATGGTCAGTGTAGTGAAATTTGTGGTATTAATCATGGTTTTATGCCAATTGTAGTTGAA  
GCTACTTCTTTACCAAATTATGTTTCCTGAATTTCTAACAACTAAATGAATAGTTATGAAAATTTTCGTT  
ATTTCAATTAATATTAATATTAATTTTTATTCTTGTTCTTATTTTCGATTAATCGTCAAAAATGTAGTGGAT  
TATTTTCAATCAACTTATCAACTTTTGAATAAAAACCAAAAAAACTTTTTCTTCAAAAAAAA-  
GTTGATAATTAATGTTATTAAAATGACTACCTTATCAAAAGTCTCTAAATCTATTCAAAGACATCCTTT  
CCATCT

>PRA\_0264

AGGTATATATTATGGTCAGTGTAGTGAAATTTGTGGTATTAATCATGGTTTTATGCCAATTGTAGTTGAA  
GCTACTTCTTTACCAAATTATGTTTCCTGAATTTCTAACAACTAAATGAATAGTTATGAAAATTTTCGTT  
ATTTCAATTAATATTAATATTAATTTTTATTCTTGTTCTTATTTTCGATTAATCGTCAAAAATGTAGTGGAT  
TATTTTCAATCAACTTATCAACTTTTGAATAAAAACCAAAAAAACTTTTTCTTCAAAAAAAA-  
GTTGATAATTAATGTTATTAAAATGACTACCTTATCAAAAGTCTCTAAATCTATTCAAAGACATCCTTT  
CCATCT

>PRA\_0307

AGGTATATATTATGGTCAGTGTAGTGAAATTTGTGGTATTAATCATGGTTTTATGCCAATTGTAGTTGAA  
GCTACTTCTTTACCAAATTATGTTTCCTGAATTTCTAACAACTAAATGAATAGTTATGAAAATTTTCGTT  
ATTTCAATTAATATTAATATTAATTTTTATTCTTGTTCTTATTTTCGATTAATCGTCAAAAATGTAGTGGAT  
TATTTTCAATCAACTTATCAACTTTTGAATAAAAACCAAAAAAACTTTTTCTTCAAAAAAAA-  
GTTGATAATTAATGTTATTAAAATGACTACCTTATCAAAAGTCTCTAAATCTATTCAAAGACATCCTTT  
CCATCT

>PRA\_0311

AGGTATATATTATGGTCAGTGTAGTGAAATTTGTGGTATTAATCATGGTTTTATGCCAATTGTAGTTGAA  
GCTACTTCTTTACCAAATTATGTTTCCTGAATTTCTAACAACTAAATGAATAGTTATGAAAATTTTCGTT  
ATTTCAATTAATATTAATATTAATTTTTATTCTTGTTCTTATTTTCGATTAATCGTCAAAAATGTAGTGGAT

TATTTTCAATCAACTTATCAACTTTTGAATAAAACCAAAAAAACTTTTCTTCAAAAAAAA-  
GTTGATAATTAATGTTATTAATAATGACTACCTTATCAAAAGTCTCTAAATCTATTCAAAGACATCCTTT  
CCATCT

>PRA\_0337

AGGTATATATTATGGTCAGTGTAGTGAAATTTGTGGTATTAATCATGGTTTTATGCCAATTGTAGTTGAA  
GCTACTTCTTTACCAAATTATGTTTCCTGAATTTCTAACAACTAAATGAATAGTTATGAAAATTTTCGTT  
ATTTCAATTAATATTAATATTAATTTTATTCTTGTTCTTATTTTCGATTAATCGTCAAAATGTAGTGGAT  
TATTTTCAATCAACTTATCAACTTTTGAATAAAACCAAAAAAACTTTTCTTCAAAAAAAA-  
GTTGATAATTAATGTTATTAATAATGACTACCTTATCAAAAGTCTCTAAATCTATTCAAAGACATCCTTT  
CCATCT

>PRA\_0338

AGGTATATATTATGGTCAGTGTAGTGAAATTTGTGGTATTAATCATGGTTTTATGCCAATTGTAGTTGAA  
GCTACTTCTTTACCAAATTATGTTTCCTGAATTTCTAACAACTAAATGAATAGTTATGAAAATTTTCGTT  
ATTTCAATTAATATTAATATTAATTTTATTCTTGTTCTTATTTTCGATTAATCGTCAAAATGTAGTGGAT  
TATTTTCAATCAACTTATCAACTTTTGAATAAAACCAAAAAAACTTTTCTTCAAAAAAAA-  
GTTGATAATTAATGTTATTAATAATGACTACCTTATCAAAAGTCTCTAAATCTATTCAAAGACATCCTTT  
CCATCT

>PRA\_0340

AGGTATATATTATGGTCAGTGTAGTGAAATTTGTGGTATTAATCATGGTTTTATGCCAATTGTAGTTGAA  
GCTACTTCTTTACCAAATTATGTTTCCTGAATTTCTAACAACTAAATGAATAGTTATGAAAATTTTCGTT  
ATTTCAATTAATATTAATATTAATTTTATTCTTGTTCTTATTTTCGATTAATCGTCAAAATGTAGTGGAT  
TATTTTCAATCAACTTATCAACTTTTGAATAAAACCAAAAAAACTTTTCTTCAAAAAAAA-  
GTTGATAATTAATGTTATTAATAATGACTACCTTATCAAAAGTCTCTAAATCTATTCAAAGACATCCTTT  
CCATCT

>PRA\_0341A

AGGTATATATTATGGTCAGTGTAGTGAAATTTGTGGTATTAATCATGGTTTTATGCCAATTGTAGTTGAA  
GCTACTTCTTTACCAAATTATGTTTCCTGAATTTCTAACAACTAAATGAATAGTTATGAAAATTTTCGTT  
ATTTCAATTAATATTAATATTAATTTTATTCTTGTTCTTATTTTCGATTAATCGTCAAAATGTAGTGGAT  
TATTTTCAATCAACTTATCAACTTTTGAATAAAACCAAAAAAACTTTTCTTCAAAAAAAA-  
GTTGATAATTAATGTTATTAATAATGACTACCTTATCAAAAGTCTCTAAATCTATTCAAAGACATCCTTT  
CCATCT

>PRA\_0341B

AGGTATATATTATGGTCAGTGTAGTGAAATTTGTGGTATTAATCATGGTTTTATGCCAATTGTAGTTGAA  
GCTACTTCTTTACCAAATTATGTTTCCTGAATTTCTAACAACTAAATGAATAGTTATGAAAATTTTCGTT  
ATTTCAATTAATATTAATATTAATTTTATTCTTGTTCTTATTTTCGATTAATCGTCAAAATGTAGTGGAT  
TATTTTCAATCAACTTATCAACTTTTGAATAAAACCAAAAAAACTTTTCTTCAAAAAAAA-  
GTTGATAATTAATGTTATTAATAATGACTACCTTATCAAAAGTCTCTAAATCTATTCAAAGACATCCTTT  
CCATCT

>PRA\_0342

AGGTATATATTATGGTCAGTGTAGTGAAATTTGTGGTATTAATCATGGTTTTATGCCAATTGTAGTTGAA  
GCTACTTCTTTACCAAATTATGTTTCCTGAATTTCTAACAACTAAATGAATAGTTATGAAAATTTTCGTT  
ATTTCAATTAATATTAATATTAATTTTATTCTTGTTCTTATTTTCGATTAATCGTCAAAATGTAGTGGAT  
TATTTTCAATCAACTTATCAACTTTTGAATAAAACCAAAAAAACTTTTCTTCAAAAAAAA-  
GTTGATAATTAATGTTATTAATAATGACTACCTTATCAAAAGTCTCTAAATCTATTCAAAGACATCCTTT  
CCATCT

>PRA\_0347

AGGTATATATTATGGTCAGTGTAGTGAAATTTGTGGTATTAATCATGGTTTTATGCCAATTGTAGTTGAA  
GCTACTTCTTTACCAAATTATGTTTCCTGAATTTCTAACAACTAAATGAATAGTTATGAAAATTTTCGTT  
ATTTCAATTAATATTAATATTAATTTTATTCTTGTTCTTATTTTCGATTAATCGTCAAAATGTAGTGGAT  
TATTTTCAATCAACTTATCAACTTTTGAATAAAACCAAAAAAACTTTTCTTCAAAAAAAA-



GTTGATAATTAATGTTATTAATAATGACTACCTTATCAAAAGTCTCTAAATCTATTCAAAGACATCCTTT  
CCATCT

>PRA\_0353

AGGTATATATTATGGTCAGTGTAGTGAAATTTGTGGTATTAATCATGGTTTTATGCCAATTGTAGTTGAA  
GCTACTTCTTTACCAAATTATGTTTCCTGAATTTCTAACAACTAAATGAATAGTTATGAAAATTCGTT  
ATTTCAATTAATATTAATATTAATTTTATTCTTGTTCTTATTTTCGATTAATCGTCAAAATGTAGTGGAT  
TATTTTCAATCAACTTATCAACTTTTGAATAAAACCAAAAAAACTTTTTCTTCAAAAAAAA-  
GTTGATAATTAATGTTATTAATAATGACTACCTTATCAAAAGTCTCTAAATCTATTCAAAGACATCCTTT  
CCATCT

>PRA\_0368

AGGTATATATTATGGTCAGTGTAGTGAAATTTGTGGTATTAATCATGGTTTTATGCCAATTGTAGTTGAA  
GCTACTTCTTTACCAAATTATGTTTCCTGAATTTCTAACAACTAAATGAATAGTTATGAAAATTCGTT  
ATTTCAATTAATATTAATATTAATTTTATTCTTGTTCTTATTTTCGATTAATCGTCAAAATGTAGTGGAT  
TATTTTCAATCAACTTATCAACTTTTGAATAAAACCAAAAAAACTTTTTCTTCAAAAAAAA-  
GTTGATAATTAATGTTATTAATAATGACTACCTTATCAAAAGTCTCTAAATCTATTCAAAGACATCCTTT  
CCATCT

>PRA\_0383A

AGGTATATATTATGGTCAGTGTAGTGAAATTTGTGGTATTAATCATGGTTTTATGCCAATTGTAGTTGAA  
GCTACTTCTTTACCAAATTATGTTTCCTGAATTTCTAACAACTAAATGAATAGTTATGAAAATTCGTT  
ATTTCAATTAATATTAATATTAATTTTATTCTTGTTCTTATTTTCGATTAATCGTCAAAATGTAGTGGAT  
TATTTTCAATCAACTTATCAACTTTTGAATAAAACCAAAAAAACTTTTTCTTCAAAAAAAA-  
GTTGATAATTAATGTTATTAATAATGACTACCTTATCAAAAGTCTCTAAATCTATTCAAAGACATCCTTT  
CCATCT

>PRA\_0383B

AGGTATATATTATGGTCAGTGTAGTGAAATTTGTGGTATTAATCATGGTTTTATGCCAATTGTAGTTGAA  
GCTACTTCTTTACCAAATTATGTTTCCTGAATTTCTAACAACTAAATGAATAGTTATGAAAATTCGTT  
ATTTCAATTAATATTAATATTAATTTTATTCTTGTTCTTATTTTCGATTAATCGTCAAAATGTAGTGGAT  
TATTTTCAATCAACTTATCAACTTTTGAATAAAACCAAAAAAACTTTTTCTTCAAAAAAAA-  
GTTGATAATTAATGTTATTAATAATGACTACCTTATCAAAAGTCTCTAAATCTATTCAAAGACATCCTTT  
CCATCT

>PRA\_0385

AGGTATATATTATGGTCAGTGTAGTGAAATTTGTGGTATTAATCATGGTTTTATGCCAATTGTAGTTGAA  
GCTACTTCTTTACCAAATTATGTTTCCTGAATTTCTAACAACTAAATGAATAGTTATGAAAATTCGTT  
ATTTCAATTAATATTAATATTAATTTTATTCTTGTTCTTATTTTCGATTAATCGTCAAAATGTAGTGGAT  
TATTTTCAATCAACTTATCAACTTTTGAATAAAACCAAAAAAACTTTTTCTTCAAAAAAAA-  
GTTGATAATTAATGTTATTAATAATGACTACCTTATCAAAAGTCTCTAAATCTATTCAAAGACATCCTTT  
CCATCT

>PRA\_0407A

AGGTATATATTATGGTCAGTGTAGTGAAATTTGTGGTATTAATCATGGTTTTATGCCAATTGTAGTTGAA  
GCTACTTCTTTACCAAATTATGTTTCCTGAATTTCTAACAACTAAATGAATAGTTATGAAAATTCGTT  
ATTTCAATTAATATTAATATTAATTTTATTCTTGTTCTTATTTTCGATTAATCGTCAAAATGTAGTGGAT  
TATTTTCAATCAACTTATCAACTTTTGAATAAAACCAAAAAAACTTTTTCTTCAAAAAAAA-  
GTTGATAATTAATGTTATTAATAATGACTACCTTATCAAAAGTCTCTAAATCTATTCAAAGACATCCTTT  
CCATCT

>PRA\_0407B

AGGTATATATTATGGTCAGTGTAGTGAAATTTGTGGTATTAATCATGGTTTTATGCCAATTGTAGTTGAA  
GCTACTTCTTTACCAAATTATGTTTCCTGAATTTCTAACAACTAAATGAATAGTTATGAAAATTCGTT  
ATTTCAATTAATATTAATATTAATTTTATTCTTGTTCTTATTTTCGATTAATCGTCAAAATGTAGTGGAT  
TATTTTCAATCAACTTATCAACTTTTGAATAAAACCAAAAAAACTTTTTCTTCAAAAAAAA-  
GTTGATAATTAATGTTATTAATAATGACTACCTTATCAAAAGTCTCTAAATCTATTCAAAGACATCCTTT

CCATCT

>PAR\_0510

AGGTATATATTATGGTCAGTGTAGTGAAATTTGTGGTATTAATCATGGTTTTATGCCAATTGTAGTTGAA  
GCTACTTCTTTACCAAATTATGTTTCCTGAATTTCTAACAACTAAATGAATAGTTATGAAAATTTTCGTT  
ATTTCAATTAATATTAATATTAATTTTATTCTTGTTCTTATTTTCGATTAATCGTCAAAATGTAGTGGAT  
TATTTTCAATCAACTTATCAACTTTTGAATAAAACCAAAAAAATTTTTCTTCAAAAAAAAAA—  
GTTGATAATTAATGTTATTAATAATGACTACCTTATCAAAGTCTCTAAATCTATTCAAAGACATCCTTT  
CCATCT

>PAR\_0511

AGGTATATATTATGGTCAGTGTAGTGAAATTTGTGGTATTAATCATGGTTTTATGCCAATTGTAGTTGAA  
GCTACTTCTTTACCAAATTATGTTTCCTGAATTTCTAACAACTAAATGAATAGTTATGAAAATTTTCGTT  
ATTTCAATTAATATTAATATTAATTTTATTCTTGTTCTTATTTTCGATTAATCGTCAAAATGTAGTGGAT  
TATTTTCAATCAACTTATCAACTTTTGAATAAAACCAAAAAAATTTTTCTTCAAAAAAAAAA—  
GTTGATAATTAATGTTATTAATAATGACTACCTTATCAAAGTCTCTAAATCTATTCAAAGACATCCTTT  
CCATCT

>PAR\_0533

AGGTATATATTATGGTCAGTGTAGTGAAATTTGTGGTATTAATCATGGTTTTATGCCAATTGTAGTTGAA  
GCTACTTCTTTACCAAATTATGTTTCCTGAATTTCTAACAACTAAATGAATAGTTATGAAAATTTTCGTT  
ATTTCAATTAATATTAATATTAATTTTATTCTTGTTCTTATTTTCGATTAATCGTCAAAATGTAGTGGAT  
TATTTTCAATCAACTTATCAACTTTTGAATAAAACCAAAAAAATTTTTCTTCAAAAAAAAAA—  
GTTGATAATTAATGTTATTAATAATGACTACCTTATCAAAGTCTCTAAATCTATTCAAAGACATCCTTT  
CCATCT

>MAR\_0667

AGGTATATATTATGGTCAGTGTAGTGAAATTTGTGGTATTAATCATGGTTTTATGCCAATTGTAGTTGAA  
GCTACTTCTTTACCAAATTATGTTTCCTGAATTTCTAACAACTAAATGAATAGTTATGAAAATTTTCGTT  
ATTTCAATTAATATTAATATTAATTTTATTCTTGTTCTTATTTTCGATTAATCGTCAAAATGTAGTGGAT  
TATTTTCAATCAACTTATCAACTTTTGAATAAAACCAAAAAAATTTTTCTTCAAAAAAAAAA—  
GTTGATAATTAATGTTATTAATAATGACTACCTTATCAAAGTCTCTAAATCTATTCAAAGACATCCTTT  
CCATCT
