# Supplementary material for: Deep genetic divergence between austral populations of the red alga Gigartina skottsbergii reveals a cryptic species endemic to the Antarctic continent
Source: Springer Nature journal article supplement (doi:10.1007/s00300-015-1762-4), 2015-07-31
Supplement: 300_2015_1762_MOESM2_ESM.pdf [file 300_2015_1762_MOESM2_ESM.pdf]

Online Resource 2: Sequence alignment of the rbcL sequences obtained for *Gigartina skottsbergii* and the outgroup species. The codes for each sampling site are the same as in Table 1.

>*Sarcothalia crispat*a\_SCU03085

```
GGTTTCAAAGCTGTTAAAGCTTAAAGGCTAGAAGATATGCGTTTACCTGTTGCTTACTTAAAAACTTTCC
AAGGTCCTGCAACTGGAGTAATCTGCGAACGTGAACGTATGGATAAATTTGGCCGTCCATTTTTAGGCGC
AACTGTTAAACCTAAATTAGGTTTATCAGGTAAAAATTATGGTAGAGTCGTCTATGAAGGACTTAAAGGC
GGTTTAGATTTCTTGAAAGATGATGAGAACATTAACCTCTCAACCTTTTATGCGTTGGAAAGAAAGATTCC
TTTACTCAATGGAAGGTGTAACCGTGCTATTGCCCTGCTGGTGAACAAAAGGACACTACTTAAATGT
AACAGCAGCTACAATGGAACAGATATACGAAAGAGCAGAATTTGCTAAACAGCTTGGCAGTATTATTGTA
ATGATTGACCTTGTAATTGGTTACACAGCTATTCAATCAATGGCTATTTGGGCTCGTAAAAATGATATGA
TACTTCATTTACATYKGCAGGTAATTCTACTTATTCTCGTCAAAAAATTCATGGTATGAATTTCCGAGT
AATATGTAAATGGATGCGTATGGCAGGTGTAGATCATATTCATGCAGGACTGTTGTAGGTAAACTGGAA
GGTGATCCTTTAATGATTAAGGCTTCTATAACACACTGCTTTTACCATATTTAGAAATAAECTTACCTC
AAGGTATATTTTTCGAACAAGATTGGGCATCCCTTCGCAAAGTTACACCTGTTGCTTCCGGTGGTATTCA
TTGCGGGCAAATGCACCAATTGTTAGATTATCTTGGAGATGATGTTGTTCTTCAATTTGGTGGTGGTACT
ATTGGTCACCCCGATGGTATTCAAGCAGGAGCAACAGCTAATCGTGTAGCTTTAGAATCGATAGTTATAG
CTCGTAATGAAGGACGTGACTACGTCACAGAAGGACCACAAATTTTACAAGATGCTGCAAA
```

>*Sarcothalia stiriata*\_SSU03089

```
GGCTTCAAAGCTGTTAAAGCTCTAAGACTAGAAGATATGCGTTTACCTGTTGCTTACTTAAAAACATTCC
AAGGTCCTGCAACTGGAGTAATCTGTGAACGTGAACGTATGGATAAGTTTGGCCGTCCATTTTTAGGTGC
AACTGTTAAACCTAAATTAGGTTTATCAGGTAAAACTACGGTAGAGTAGTATATGAAGGACTTAAAGGC
GGTTTAGATTTCTTGAAAGATGATGAGAACATTAACCTCTCAACCTTTTATGCGTTGGAAAGAAAGATTTC
TTTATTCAATGGAAGGTGTAATCGTGCTATTGCTGCTGCTGGTGAGACAAAAGGACATTACTTAAATGT
AACAGCTGCTACAATGGAACAGATGTATGAAAGAGCTGAATTTGCTAAACAGCTTGGCACTATTATTGTC
ATGATTGACCTTGTAATTGGTTACACAGCTATTCAATCAATGGCTATTTGGGCTCGTAAAAATGATATGA
TTCTTCATTTACATCGTGCGGGTAATTCTACTTATTCTCGTCAAAAAATTCATGGTATGAATTTCCGAGT
GATATGCAAATGGATGCGTATGGCAGGTGTAGATCATATTCATGCAGGACTGTTGTAGGTAAACTAGAA
GGTGATCCTTTAATGATTAGAGGCTTCTATAACACTGCTTTTACCGTATTTGGAAATAAECTTACCCC
AAGGTATATTTTTCGAACAAGATTGGGCATCCCTTCGCAAAGTTACACCTGTTGCTTCCGGTGGTATTCA
TTGCGGACAAATGCACCAATTATTAGATTATCTTGGAGATGATGTTGTTCTTCAATTCGGTGGTGGTACT
ATTGGTCACCCTGATGGTATTCAAGCAGGAGCAACAGCTAATCGTGTAGCTTTAGAATCGATAGTTATAG
CTCGTAATGAAGGACGTGACTATGTCACAGAAGGACCACAAATTTTACAAGATGCTGCAAA
```

>*Sarcothalia livida*\_SLU03087

```
GGTTTTAAAGCTGTTAAAGCTCTAAGACTAGAAGATATGCGTTTACCTGTTGCTTACTTAAAAACTTTCC
AAGGTCCTGCAACTGGAGTAATCTGTGAACGTGAACGTATGGATAAGTTTGGCCGTCCATTTTTAGGTGC
AACTGTTAAACCTAAATTAGGTTTATCAGGTAAAACTACGGTAGAGTAGTATATGAAGGACTTAAAGGC
GGTTTAGATTTCTTGAAAGATGATGAGAACATTAACCTCTCAACCTTTTATGCGTTGGAAAGAAAGATTCC
TTTATTCAATGGAAGGTGTAACCGTGCTATTGCTGCTGCTGGTGAGACAAAAGGACATTACTTAAATGT
AACAGCTGCTACAATGGAACAGATGTACGAAAGAGCTGAATTTGCTAAACAGCTTGGCAGTATTATTGTC
ATGATTGACCTTGTAATTGGTTACACAGCTATTCAATCAATGGCTATTTGGGCTCGTAAAAATGATATGA
TTCTTCATTTACATCGTGCGGGTAATTCTACTTACTCTCGTCAAAAAATTCATGGTATGAATTTCCGAGT
TATATGCAAATGGATGCGTATGGCAGGTGTAGATCATATTCATGCAGGACTGTTGTAGGTAAACTAGAA
GGTGATCCTTTAATGATTAGAGGCTTCTATAACACTGCTTTTACCTTATTTGGAAATAAECTTACCTC
AAGGTATATTTTTCGAACAAGATTGGGCATCCCTTCGCAAAGTTACACCTGTTGCTTCCGGTGGTATTCA
TTGCGGACAAATGCACCAATTATTAGATTATCTTGGAGTTGATGTTGTTCTTCAATTCGGTGGTGGGACT
ATTGGTCACCCTGATGGTATTCAAGCAGGAGCAACAGCTAATCGTGTAGCTTTAGAATCGATGGTTATAG
CTCGTAATGAAGGACGTGATTACGTCACAGAAGGACCACAAATTTTACATGATGCTGCAAA
```

>*Sarcothalia circumcincta*\_AF146219



AACAGCAGCTACAATGGAAGAGATATATGAAAGAGCTGAATTTGCTAAACAGCTTGGTAGTATTATTATA  
ATGGTTGACCTTGAATTGGTTACACAGCTATTCAAACAATGGCTATTTGGTCTCGTAAAAATGATATGA  
TTCTTCATTTACACCGTGCAGGTAACCTCTACTTATTCTCGCCAAAAAATCCATGGTATGAATTTCCGAGT  
AATATGTAAATGGATGCGTATGGCAGGTGTAGACCATATTCACGCAGGTACAGTTGTAGGTAAGCTAGAA  
GGTGATCCTTTAATGATTCGAGGTTTCTATAATACTACTTTTACCATATTTAGAAGTGAATTTACCAC  
AAGGTATATTTTTTTGAACAAGACTGGGCATCTCTTAGAAAAGTTACACCGGTTGCTTCTGGTGGTATTCA  
CTGTGGGCAAATGCACCAATTATTAGATTATCTTGGAGATGATGTTGTTCTTCAATTCGGTGGTGGTACT  
ATTGGTCATCCTGATGGTATTCAAGCAGGAGCAACAGCTAACCGTGTAGCTTTAGAATCAATAGTTATAG  
CTCGTAATGAAGGACGTGACTATGTAACAGAAGGACCACAAATTTTGCAAGATGCTGCAA

>ANC\_22

GGTTTTAAAGCTGTTAAAGCTTTAAGACTAGAAGATATGCGTTTACCTGTTGCTTATTTAAAACTTTTC  
AAGGTCCTGCAACTGGCGTAATCTGCGAACGTGAACGTATGGACAAGTTTGGCCGTCCATTTTTAGGTGC  
AACTGTTAAACCTAAATTAGGCTTATCAGGTA AAAACTATGGTCGAGTAGTCTATGAAGGGCTTAAAGGT  
GGCTTAGACTTCTTAAAAGATGATGAGAATATTAATTCTCAACCTTTTATGCGTTGGAAAGAAAGATACC  
TGTATTCAATGGAAGGTGTA AATCGTGCTATTGCTGCTGCTGGTGAACAAAAGGACATTACTTGAATGT  
AACAGCAGCTACAATGGAAGAGATATATGAAAGAGCTGAATTTGCTAAACAGCTTGGTAGTATTATTATA  
ATGGTTGACCTTGAATTGGTTACACAGCTATTCAAACAATGGCTATTTGGTCTCGTAAAAATGATATGA  
TTCTTCATTTACACCGTGCAGGTAACCTCTACTTATTCTCGCCAAAAAATCCATGGTATGAATTTCCGAGT  
AATATGTAAATGGATGCGTATGGCAGGTGTAGACCATATTCACGCAGGTACAGTTGTAGGTAAGCTAGAA  
GGTGATCCTTTAATGATTCGAGGTTTCTATAATACTACTTTTACCATATTTAGAAGTGAATTTACCAC  
AAGGTATATTTTTTTGAACAAGACTGGGCATCTCTTAGAAAAGTTACACCGGTTGCTTCTGGTGGTATTCA  
CTGTGGGCAAATGCACCAATTATTAGATTATCTTGGAGATGATGTTGTTCTTCAATTCGGTGGTGGTACT  
ATTGGTCATCCTGATGGTATTCAAGCAGGAGCAACAGCTAACCGTGTAGCTTTAGAATCAATAGTTATAG  
CTCGTAATGAAGGACGTGACTATGTAACAGAAGGACCACAAATTTTGCAAGATGCTGCAA

>BCH\_17

GGTTTTAAAGCTGTTAAAGCTTTAAGACTAGAAGATATGCGTTTACCTGTTGCTTATTTAAAACTTTTC  
AAGGTCCTGCAACTGGCGTAATCTGCGAACGTGAACGTATGGACAAGTTTGGCCGTCCATTTTTAGGTGC  
AACTGTTAAACCTAAATTAGGCTTATCAGGTA AAAACTATGGTCGAGTAGTCTATGAAGGGCTTAAAGGT  
GGCTTAGACTTCTTAAAAGATGATGAGAATATTAATTCTCAACCTTTTATGCGTTGGAAAGAAAGATACC  
TGTATTCAATGGAAGGTGTA AATCGTGCTATTGCTGCTGCTGGTGAACAAAAGGACATTACTTGAATGT  
AACAGCAGCTACAATGGAAGAGATCTATGAAAGAGCTGAATTTGCTAAACAGCTTGGTAGTATTATTATA  
ATGGTTGACCTTGAATTGGTTACACAGCTATTCAAACAATGGCTATTTGGTCTCGTAAAAATGATATGA  
TTCTTCATCTACACCGTGCAGGTAACCTCTACTTATTCTCGCCAAAAAATTCATGGTATGAATTTCCGAGT  
AATATGTAAATGGATGCGTATGGCAGGTGTAGACCATATTCACGCAGGTACAGTTGTAGGTAAGCTAGAA  
GGTGATCCTTTAATGATTCGAGGTTTCTATAATACTACTTTTACCATATTTAGAAGTGAATTTACCAC  
AAGGTATATTTTTTTGAACAAGACTGGGCATCTCTTAGAAAAGTTACACCGGTTGCTTCTGGTGGTATTCA  
CTGTGGGCAAATGCACCAATTATTAGATTATCTTGGAGATGATGTTGTTCTTCAATTCGGTGGTGGTACT  
ATTGGTCATCCTGATGGTATTCAAGCAGGAGCAACAGCTAACCGTGTAGCTTTAGAATCAATAGTTATAG  
CTCGTAATGAAGGACGTGACTATGTAACAGAAGGACCACAAATTTTGCAAGATGCTGCAA

>BCH\_19

GGTTTTAAAGCTGTTAAAGCTTTAAGACTAGAAGATATGCGTTTACCTGTTGCTTATTTAAAACTTTTC  
AAGGTCCTGCAACTGGCGTAATCTGCGAACGTGAACGTATGGACAAGTTTGGCCGTCCATTTTTAGGTGC  
AACTGTTAAACCTAAATTAGGCTTATCAGGTA AAAACTATGGTCGAGTAGTCTATGAAGGGCTTAAAGGT  
GGCTTAGACTTCTTAAAAGATGATGAGAATATTAATTCTCAACCTTTTATGCGTTGGAAAGAAAGATACC  
TGTATTCAATGGAAGGTGTA AATCGTGCTATTGCTGCTGCTGGTGAACAAAAGGACATTACTTGAATGT  
AACAGCAGCTACAATGGAAGAGATCTATGAAAGAGCTGAATTTGCTAAACAGCTTGGTAGTATTATTATA  
ATGGTTGACCTTGAATTGGTTACACAGCTATTCAAACAATGGCTATTTGGTCTCGTAAAAATGATATGA  
TTCTTCATCTACACCGTGCAGGTAACCTCTACTTATTCTCGCCAAAAAATTCATGGTATGAATTTCCGAGT  
AATATGTAAATGGATGCGTATGGCAGGTGTAGACCATATTCACGCAGGTACAGTTGTAGGTAAGCTAGAA  
GGTGATCCTTTAATGATTCGAGGTTTCTATAATACTACTTTTACCATATTTAGAAGTGAATTTACCAC

AAGGTATATTTTTGAACAAGACTGGGCATCTCTTAGAAAAGTTACACCGGTTGCTTCTGGTGGTATTCA  
CTGTGGGCAAATGCACCAATTATTAGATTATCTTGGAGATGATGTTGTTCTTCAATTCGGTGGTGGTACT  
ATTGGTCATCCTGATGGTATTCAAGCAGGAGCAACAGCTAACCGTGTAGCTTTAGAATCAATAGTTATAG  
CTCGTAATGAAGGACGTGACTATGTAACAGAAGGACCACAAATTTTGCAAGATGCTGCAA

>BIN\_8

GGTTTTAAAGCTGTTAAAGCTTTAAGACTAGAAGATATGCGTTTACCTGTTGCTTATTTAAAACTTTTC  
AAGGTCTGCAACTGGCGTAATCTGCGAACGTGAACGTATGGACAAGTTTGGCCGTCCATTTTTAGGTGC  
AACTGTTAAACCTAAATTAGGCTTATCAGGTAAAACTATGGTCGAGTAGTCTATGAAGGGCTTAAAGGT  
GGCTTAGACTTCTTAAAAGATGATGAGAATATTAATTCTCAACCTTTTATGCGTTGGAAAGAAAGATAACC  
TGTATTCAATGGAAGGTGTAATCGTGCTATTGCTGCTGCTGGTGAACAAAAGGACATTACTTGAATGT  
AACAGCAGCTACAATGGAAGAGATCTATGAAAGAGCTGAATTTGCTAAACAGCTTGGTAGTATTATTATA  
ATGGTTGACCTTGTAATTGGTTACACAGCTATTCAAACAATGGCTATTTGGTCTCGTAAAAATGATATGA  
TTCTTCATCTACACCGTGCAGGTAACCTCTACTTATTCTCGCCAAAAAATTCATGGTATGAATTTCCGAGT  
AATATGTAAATGGATGCGTATGGCAGGTGTAGACCATATTCACGCAGGTACAGTTGTAGGTAAGCTAGAA  
GGTATCCTTTAATGATTCGAGGTTTCTATAATACTACTTTTACCATATTTAGAAGTGAATTTACCAC  
AAGGTATATTTTTGAACAAGACTGGGCATCTCTTAGAAAAGTTACACCGGTTGCTTCTGGTGGTATTCA  
CTGTGGGCAAATGCACCAATTATTAGATTATCTTGGAGATGATGTTGTTCTTCAATTCGGTGGTGGTACT  
ATTGGTCATCCTGATGGTATTCAAGCAGGAGCAACAGCTAACCGTGTAGCTTTAGAATCAATAGTTATAG  
CTCGTAATGAAGGACGTGACTATGTAACAGAAGGACCACAAATTTTGCAAGATGCTGCAA

>BIN\_26

GGTTTTAAAGCTGTTAAAGCTTTAAGACTAGAAGATATGCGTTTACCTGTTGCTTATTTAAAACTTTTC  
AAGGTCTGCAACTGGCGTAATCTGCGAACGTGAACGTATGGACAAGTTTGGCCGTCCATTTTTAGGTGC  
AACTGTTAAACCTAAATTAGGCTTATCAGGTAAAACTATGGTCGAGTAGTCTATGAAGGGCTTAAAGGT  
GGCTTAGACTTCTTAAAAGATGATGAGAATATTAATTCTCAACCTTTTATGCGTTGGAAAGAAAGATAACC  
TGTATTCAATGGAAGGTGTAATCGTGCTATTGCTGCTGCTGGTGAACAAAAGGACATTACTTGAATGT  
AACAGCAGCTACAATGGAAGAGATCTATGAAAGAGCTGAATTTGCTAAACAGCTTGGTAGTATTATTATA  
ATGGTTGACCTTGTAATTGGTTACACAGCTATTCAAACAATGGCTATTTGGTCTCGTAAAAATGATATGA  
TTCTTCATCTACACCGTGCAGGTAACCTCTACTTATTCTCGCCAAAAAATTCATGGTATGAATTTCCGAGT  
AATATGTAAATGGATGCGTATGGCAGGTGTAGACCATATTCACGCAGGTACAGTTGTAGGTAAGCTAGAA  
GGTATCCTTTAATGATTCGAGGTTTCTATAATACTACTTTTACCATATTTAGAAGTGAATTTACCAC  
AAGGTATATTTTTGAACAAGACTGGGCATCTCTTAGAAAAGTTACACCGGTTGCTTCTGGTGGTATTCA  
CTGTGGGCAAATGCACCAATTATTAGATTATCTTGGAGATGATGTTGTTCTTCAATTCGGTGGTGGTACT  
ATTGGTCATCCTGATGGTATTCAAGCAGGAGCAACAGCTAACCGTGTAGCTTTAGAATCAATAGTTATAG  
CTCGTAATGAAGGACGTGACTATGTAACAGAAGGACCACAAATTTTGCAAGATGCTGCAA

>BLO\_12

GGTTTTAAAGCTGTTAAAGCTTTAAGACTAGAAGATATGCGTTTACCTGTTGCTTATTTAAAACTTTTC  
AAGGTCTGCAACTGGCGTAATCTGCGAACGTGAACGTATGGACAAGTTTGGCCGTCCATTTTTAGGTGC  
AACTGTTAAACCTAAATTAGGCTTATCAGGTAAAACTATGGTCGAGTAGTCTATGAAGGGCTTAAAGGT  
GGCTTAGACTTCTTAAAAGATGATGAGAATATTAATTCTCAACCTTTTATGCGTTGGAAAGAAAGATAACC  
TGTATTCAATGGAAGGTGTAATCGTGCTATTGCTGCTGCTGGTGAACAAAAGGACATTACTTGAATGT  
AACAGCAGCTACAATGGAAGAGATCTATGAAAGAGCTGAATTTGCTAAACAGCTTGGTAGTATTATTATA  
ATGGTTGACCTTGTAATTGGTTACACAGCTATTCAAACAATGGCTATTTGGTCTCGTAAAAATGATATGA  
TTCTTCATCTACACCGTGCAGGTAACCTCTACTTATTCTCGCCAAAAAATTCATGGTATGAATTTCCGAGT  
AATATGTAAATGGATGCGTATGGCAGGTGTAGACCATATTCACGCAGGTACAGTTGTAGGTAAGCTAGAA  
GGTATCCTTTAATGATTCGAGGTTTCTATAATACTACTTTTACCATATTTAGAAGTGAATTTACCAC  
AAGGTATATTTTTGAACAAGACTGGGCATCTCTTAGAAAAGTTACACCGGTTGCTTCTGGTGGTATTCA  
CTGTGGGCAAATGCACCAATTATTAGATTATCTTGGAGATGATGTTGTTCTTCAATTCGGTGGTGGTACT  
ATTGGTCATCCTGATGGTATTCAAGCAGGAGCAACAGCTAACCGTGTAGCTTTAGAATCAATAGTTATAG  
CTCGTAATGAAGGACGTGACTATGTAACAGAAGGACCACAAATTTTGCAAGATGCTGCAA

>ICL\_14

GGTTTTAAAGCTGTTAAAGCTTTAAGACTAGAAGATATGCGTTTACCTGTTGCTTATTTAAAACTTTTC  
AAGGTCCTGCAACTGGCGTAATCTGCGAACGTGAACGTATGGACAAGTTGGCCGTCCATTTTTAGGTGC  
AACTGTTAAACCTAAATTAGGCTTATCAGGTAAAACTATGGTCGAGTAGTCTATGAAGGGCTTAAAGGT  
GGCTTAGACTTCTTAAAAGATGATGAGAATATTAATTCTCAACCTTTTATGCGTTGGAAAGAAAGATACC  
TGTATTCAATGGAAGGTGTAATCGTGCTATTGCTGCTGCTGGTGAACAAAAGGACATTACTTGAATGT  
AACAGCAGCTACAATGGAAGAGATCTATGAAAGAGCTGAATTTGCTAAACAGCTTGGTAGTATTATTATA  
ATGGTTGACCTTGAATTGGTTACACAGCTATTCAAACAATGGCTATTTGGTCTCGTAAAAATGATATGA  
TTCTTCATCTACACCGTGCAGGTAACCTCTACTTATTCTCGCCAAAAAATTCATGGTATGAATTTCCGAGT  
AATATGTAAATGGATGCGTATGGCAGGTGTAGACCATATTCACGCAGGTACAGTTGTAGGTAAGCTAGAA  
GGTGATCCTTTAATGATTCGAGGTTTCTATAATACTACTTTTACCATATTTAGAAGTGAATTTACCAC  
AAGGTATATTTTTGAACAAGACTGGGCATCTCTTAGAAAAGTTACACCGGTTGCTTCTGGTGGTATTCA  
CTGTGGGCAAATGCACCAATTATTAGATTATCTTGGAGATGATGTTGTTCTTCAATTCGGTGGTGGTACT  
ATTGGTCATCCTGATGGTATTCAAGCAGGAGCAACAGCTAACCGTGTAGCTTTAGAATCAATAGTTATAG  
CTCGTAATGAAGGACGTGACTATGTAACAGAAGGACCACAAATTTTGCAAGATGCTGCAA

>ILO\_9

GGTTTTAAAGCTGTTAAAGCTTTAAGACTAGAAGATATGCGTTTACCTGTTGCTTATTTAAAACTTTTC  
AAGGTCCTGCAACTGGCGTAATCTGCGAACGTGAACGTATGGACAAGTTGGCCGTCCATTTTTAGGTGC  
AACTGTTAAACCTAAATTAGGCTTATCAGGTAAAACTATGGTCGAGTAGTCTATGAAGGGCTTAAAGGT  
GGCTTAGACTTCTTAAAAGATGATGAGAATATTAATTCTCAACCTTTTATGCGTTGGAAAGAAAGATACC  
TGTATTCAATGGAAGGTGTAATCGTGCTATTGCTGCTGCTGGTGAACAAAAGGACATTACTTGAATGT  
AACAGCAGCTACAATGGAAGAGATCTATGAAAGAGCTGAATTTGCTAAACAGCTTGGTAGTATTATTATA  
ATGGTTGACCTTGAATTGGTTACACAGCTATTCAAACAATGGCTATTTGGTCTCGTAAAAATGATATGA  
TTCTTCATCTACACCGTGCAGGTAACCTCTACTTATTCTCGCCAAAAAATTCATGGTATGAATTTCCGAGT  
AATATGTAAATGGATGCGTATGGCAGGTGTAGACCATATTCACGCAGGTACAGTTGTAGGTAAGCTAGAA  
GGTGATCCTTTAATGATTCGAGGTTTCTATAATACTACTTTTACCATATTTAGAAGTGAATTTACCAC  
AAGGTATATTTTTGAACAAGACTGGGCATCTCTTAGAAAAGTTACACCGGTTGCTTCTGGTGGTATTCA  
CTGTGGGCAAATGCACCAATTATTAGATTATCTTGGAGATGATGTTGTTCTTCAATTCGGTGGTGGTACT  
ATTGGTCATCCTGATGGTATTCAAGCAGGAGCAACAGCTAACCGTGTAGCTTTAGAATCAATAGTTATAG  
CTCGTAATGAAGGACGTGACTATGTAACAGAAGGACCACAAATTTTGCAAGATGCTGCAA

>BOR\_14

GGTTTTAAAGCTCTTAAAGCTTTAAGACTAGAAGATATGCGTTTACCTGTTGCTTATTTAAAACTTTTC  
AAGGTCCTGCAACTGGCGTAATCTGCGAACGTGAACGTATGGACAAGTTGGCCGTCCATTTTTAGGTGC  
AACTGTTAAACCTAAATTAGGCTTATCAGGTAAAACTATGGTCGAGTAGTCTATGAAGGGCTTAAAGGT  
GGCTTAGACTTCTTAAAAGATGATGAGAATATTAATTCTCAACCTTTTATGCGTTGGAAAGAAAGATACC  
TGTATTCAATGGAAGGTGTAATCGTGCTATTGCTGCTGCTGGTGAACAAAAGGACATTACTTGAATGT  
AACAGCAGCTACAATGGAAGAGATATATGAAAGAGCTGAATTTGCTAAACAGCTTGGTAGTATTATTATA  
ATGGTTGACCTTGAATTGGTTACACAGCTATTCAAACAATGGCTATTTGGTCTCGTAAAAATGATATGA  
TTCTTCATCTACACCGTGCAGGTAACCTCTACTTATTCTCGCCAAAAAATCCATGGTATGAATTTCCGAGT  
AATATGTAAATGGATGCGTATGGCAGGTGTAGACCATATTCACGCAGGTACAGTTGTAGGTAAGCTAGAA  
GGTGATCCTTTAATGATTCGAGGTTTCTATAATACTACTTTTACCATATTTAGAAGTGAATTTACCAC  
AAGGTATATTTTTGAACAAGACTGGGCATCTCTTAGAAAAGTTACACCGGTTGCTTCTGGTGGTATTCA  
CTGTGGGCAAATGCACCAATTATTAGATTATCTTGGAGATGATGTTGTTCTTCAATTCGGTGGTGGTACT  
ATTGGTCATCCTGATGGTATTCAAGCAGGAGCAACAGCTAACCGTGTAGCTTTAGAATCAATAGTTATAG  
CTCGTAATGAAGGACGTGACTATGTAACAGAAGGACCACAAATTTTGCAAGATGCTGCAA

>FAL\_18

GGTTTTAAAGCTCTTAAAGCTTTAAGACTAGAAGATATGCGTTTACCTGTTGCTTATTTAAAACTTTTC  
AAGGTCCTGCAACTGGCGTAATCTGCGAACGTGAACGTATGGACAAGTTGGCCGTCCATTTTTAGGTGC  
AACTGTTAAACCTAAATTAGGCTTATCAGGTAAAACTATGGTCGAGTAGTCTATGAAGGGCTTAAAGGT  
GGCTTAGACTTCTTAAAAGATGATGAGAATATTAATTCTCAACCTTTTATGCGTTGGAAAGAAAGATACC  
TGTATTCAATGGAAGGTGTAATCGTGCTATTGCTGCTGCTGGTGAACAAAAGGACATTACTTGAATGT

AACAGCAGCTACAATGGAAGAGATATATGAAAGAGCTGAATTTGCTAAACAGCTTGGTAGTATTATTATA  
ATGTTGACCTTGTAATTGGTTACACAGCTATTCAAACAATGGCTATTTGGTCTCGTAAAAATGATATGA  
TTCTTCATCTACACCGTGCAGGTAACCTACTTATTCTCGCCAAAAAATCCATGGTATGAATTTCCGAGT  
AATATGTAAATGGATGCGTATGGCAGGTGTAGACCATATTCACGCAGGTACAGTTGTAGGTAAGCTAGAA  
GGTGATCCTTTAATGATTCGAGGTTTCTATAATACTACTTTTACCATATTTAGAAGTGAATTTACCAC  
AAGGTATATTTTTTTGAACAAGACTGGGCATCTCTTAGAAAAGTTACACCGGTTGCTTCTGGTGGTATTCA  
CTGTGGGCAAATGCACCAATTATTAGATTATCTTGGAGATGATGTTGTTCTTCAATTCGGTGGTGGTACT  
ATTGGTCATCCTGATGGTATTCAAGCAGGAGCAACAGCTAACCGTGTAGCTTTAGAATCAATAGTTATAG  
CTCGTAATGAAGGACGTGACTATGTAACAGAAGGACCACAAATTTTGAAGATGCTGCAA

>FAL\_9

GGTTTTAAAGCTCTTAAAGCTTTAAGACTAGAAGATATGCGTTTACCTGTTGCTTATTTAAAACTTTTC  
AAGGTCTGCAACTGGCGTAATCTGCGAACGTGAACGTATGGACAAGTTTGGCCGTCCATTTTTAGGTGC  
AACTGTTAAACCTAAATTAGGCTTATCAGGTAAAACTATGGTCGAGTAGTCTATGAAGGGCTTAAAGGT  
GGCTTAGACTTCTTAAAAGATGATGAGAATATTAATTCTCAACCTTTTATGCGTTGGAAAGAAAGATACC  
TGTATTCAATGGAAGGTGTAATCGTGCTATTGCTGCTGCTGGTGAACAAAAGGACATTACTTGAATGT  
AACAGCAGCTACAATGGAAGAGATATATGAAAGAGCTGAATTTGCTAAACAGCTTGGTAGTATTATTATA  
ATGTTGACCTTGTAATTGGTTACACAGCTATTCAAACAATGGCTATTTGGTCTCGTAAAAATGATATGA  
TTCTTCATCTACACCGTGCAGGTAACCTACTTATTCTCGCCAAAAAATCCATGGTATGAATTTCCGAGT  
AATATGTAAATGGATGCGTATGGCAGGTGTAGACCATATTCACGCAGGTACAGTTGTAGGTAAGCTAGAA  
GGTGATCCTTTAATGATTCGAGGTTTCTATAATACTACTTTTACCATATTTAGAAGTGAATTTACCAC  
AAGGTATATTTTTTTGAACAAGACTGGGCATCTCTTAGAAAAGTTACACCGGTTGCTTCTGGTGGTATTCA  
CTGTGGGCAAATGCACCAATTATTAGATTATCTTGGAGATGATGTTGTTCTTCAATTCGGTGGTGGTACT  
ATTGGTCATCCTGATGGTATTCAAGCAGGAGCAACAGCTAACCGTGTAGCTTTAGAATCAATAGTTATAG  
CTCGTAATGAAGGACGTGACTATGTAACAGAAGGACCACAAATTTTGAAGATGCTGCAA

>FAL\_10

GGTTTTAAAGCTCTTAAAGCTTTAAGACTAGAAGATATGCGTTTACCTGTTGCTTATTTAAAACTTTTC  
AAGGTCTGCAACTGGCGTAATCTGCGAACGTGAACGTATGGACAAGTTTGGCCGTCCATTTTTAGGTGC  
AACTGTTAAACCTAAATTAGGCTTATCAGGTAAAACTATGGTCGAGTAGTCTATGAAGGGCTTAAAGGT  
GGCTTAGACTTCTTAAAAGATGATGAGAATATTAATTCTCAACCTTTTATGCGTTGGAAAGAAAGATACC  
TGTATTCAATGGAAGGTGTAATCGTGCTATTGCTGCTGCTGGTGAACAAAAGGACATTACTTGAATGT  
AACAGCAGCTACAATGGAAGAGATATATGAAAGAGCTGAATTTGCTAAACAGCTTGGTAGTATTATTATA  
ATGTTGACCTTGTAATTGGTTACACAGCTATTCAAACAATGGCTATTTGGTCTCGTAAAAATGATATGA  
TTCTTCATCTACACCGTGCAGGTAACCTACTTATTCTCGCCAAAAAATCCATGGTATGAATTTCCGAGT  
AATATGTAAATGGATGCGTATGGCAGGTGTAGACCATATTCACGCAGGTACAGTTGTAGGTAAGCTAGAA  
GGTGATCCTTTAATGATTCGAGGTTTCTATAATACTACTTTTACCATATTTAGAAGTGAATTTACCAC  
AAGGTATATTTTTTTGAACAAGACTGGGCATCTCTTAGAAAAGTTACACCGGTTGCTTCTGGTGGTATTCA  
CTGTGGGCAAATGCACCAATTATTAGATTATCTTGGAGATGATGTTGTTCTTCAATTCGGTGGTGGTACT  
ATTGGTCATCCTGATGGTATTCAAGCAGGAGCAACAGCTAACCGTGTAGCTTTAGAATCAATAGTTATAG  
CTCGTAATGAAGGACGTGACTATGTAACAGAAGGACCACAAATTTTGAAGATGCTGCAA

>FAL\_13

GGTTTTAAAGCTCTTAAAGCTTTAAGACTAGAAGATATGCGTTTACCTGTTGCTTATTTAAAACTTTTC  
AAGGTCTGCAACTGGCGTAATCTGCGAACGTGAACGTATGGACAAGTTTGGCCGTCCATTTTTAGGTGC  
AACTGTTAAACCTAAATTAGGCTTATCAGGTAAAACTATGGTCGAGTAGTCTATGAAGGGCTTAAAGGT  
GGCTTAGACTTCTTAAAAGATGATGAGAATATTAATTCTCAACCTTTTATGCGTTGGAAAGAAAGATACC  
TGTATTCAATGGAAGGTGTAATCGTGCTATTGCTGCTGCTGGTGAACAAAAGGACATTACTTGAATGT  
AACAGCAGCTACAATGGAAGAGATATATGAAAGAGCTGAATTTGCTAAACAGCTTGGTAGTATTATTATA  
ATGTTGACCTTGTAATTGGTTACACAGCTATTCAAACAATGGCTATTTGGTCTCGTAAAAATGATATGA  
TTCTTCATCTACACCGTGCAGGTAACCTACTTATTCTCGCCAAAAAATCCATGGTATGAATTTCCGAGT  
AATATGTAAATGGATGCGTATGGCAGGTGTAGACCATATTCACGCAGGTACAGTTGTAGGTAAGCTAGAA  
GGTGATCCTTTAATGATTCGAGGTTTCTATAATACTACTTTTACCATATTTAGAAGTGAATTTACCAC

AAGGTATATTTTTGAACAAGACTGGGCATCTCTTAGAAAAGTTACACCGGTTGCTTCTGGTGGTATTCA  
CTGTGGGCAAATGCACCAATTATTAGATTATCTTGGAGATGATGTTGTTCTTCAATTCGGTGGTGGTACT  
ATTGGTCATCCTGATGGTATTCAAGCAGGAGCAACAGCTAACCGTGTAGCTTTAGAATCAATAGTTATAG  
CTCGTAATGAAGGACGTGACTATGTAACAGAAGGACCACAAATTTTGCAAGATGCTGCAA

>FAL\_1

GGTTTTAAAGCTCTTAAAGCTTAAAGACTAGAAGATATGCGTTTACCTGTTGCTTATTTAAAACTTTTC  
AAGGTCTGCAACTGGCGTAATCTGCGAACGTGAACGTATGGACAAGTTTGGCCGTCCATTTTTAGGTGC  
AACTGTTAAACCTAAATTAGGCTTATCAGGTAAAACTATGGTCGAGTAGTCTATGAAGGGCTTAAAGGT  
GGCTTAGACTTCTTAAAAGATGATGAGAATATTAATTCTCAACCTTTTATGCGTTGGAAAGAAAGATACC  
TGTATTCAATGGAAGGTGTAATCGTGCTATTGCTGCTGCTGGTGAACAAAAGGACATTACTTGAATGT  
AACAGCAGCTACAATGGAAGAGATATATGAAAGAGCTGAATTTGCTAAACAGCTTGGTAGTATTATTATA  
ATGGTTGACCTTGTAATTGGTTACACAGCTATTCAAACAATGGCTATTTGGTCTCGTAAAAATGATATGA  
TTCTTCATCTACACCGTGCAGGTAACCTCTACTTATTCTCGCCAAAAATCCATGGTATGAATTTCCGAGT  
AATATGTAAATGGATGCGTATGGCAGGTGTAGACCATATTCACGCAGGTACAGTTGTAGGTAAGCTAGAA  
GGTATCCTTTAATGATTCGAGGTTTCTATAATACACTACTTTTACCATATTTAGAAGTGAATTTACCAC  
AAGGTATATTTTTGAACAAGACTGGGCATCTCTTAGAAAAGTTACACCGGTTGCTTCTGGTGGTATTCA  
CTGTGGGCAAATGCACCAATTATTAGATTATCTTGGAGATGATGTTGTTCTTCAATTCGGTGGTGGTACT  
ATTGGTCATCCTGATGGTATTCAAGCAGGAGCAACAGCTAACCGTGTAGCTTTAGAATCAATAGTTATAG  
CTCGTAATGAAGGACGTGACTATGTAACAGAAGGACCACAAATTTTGCAAGATGCTGCAA

>AIT\_5

GGTTTTAAAGCTCTTAAAGCTTAAAGACTAGAAGATATGCGTTTACCTGTTGCTTATTTAAAACTTTTC  
AAGGTCTGCAACTGGCGTAATCTGCGAACGTGAACGTATGGACAAGTTTGGCCGTCCATTTTTAGGTGC  
AACTGTTAAACCTAAATTAGGCTTATCAGGCAAAAACTATGGTCGAGTAGTCTATGAAGGGCTTAAAGGT  
GGCTTAGACTTCTTAAAAGATGATGAGAATATTAATTCTCAACCTTTTATGCGTTGGAAAGAAAGATTCC  
TGTATTCAATGGAAGGTGTAATCGTGCTATTGCTGCTGCTGGCGAAACAAAAGGACATTACTTAAATGT  
AACAGCAGCTACAATGGAAGAGATATATGAAAGAGCTGAGTTTGGTAAACAGCTTGGTAGTATTATTGTC  
ATGATTGACCTTGTAATTGGTTACACAGCTATTCAAACAATGGCTATTTGGGCTCGTAAAAATGATATGA  
TTCTTCATCTACATCGTGCAGGTAACCTCTACTTATTCTCGCCAAAAATCCATGGTATGAATTTCCGAGT  
AATATGTAAATGGATGCGTATGGCAGGTGTAGACCATATTCACGCAGGTACAGTTGTAGGTAAGCTAGAA  
GGTATCCTTTAATGATTCGAGGTTTCTATAATACATTACTTTTACCATATTTAGAAGTGAATTTATCAC  
AAGGTATATTTTTGAACAAGATTGGGCATCTCTTAGAAAAGTTACACCGGTTGCTTCTGGTGGTATTCA  
CTGTGGACAAATGCACCAACTATTAGACTATCTTGGAGATGATGTTGTTCTTCAATTCGGTGGTGGTACT  
ATTGGTCACCCCGATGGTATTCAAGCAGGAGCAACAGCTAATCGTGTAGCTTTAGAATCAATAGTTATAG  
CTCGTAATGAAGGACGTGACTATGTAACAGAAGGACCACAAATTTTGCAAGATGCTGCAA

>HAN\_9

GGTTTTAAAGCTCTTAAAGCTTAAAGACTAGAAGATATGCGTTTACCTGTTGCTTATTTAAAACTTTTC  
AAGGTCTGCAACTGGCGTAATCTGCGAACGTGAACGTATGGACAAGTTTGGCCGTCCATTTTTAGGTGC  
AACTGTTAAACCTAAATTAGGCTTATCAGGCAAAAACTATGGTCGAGTAGTCTATGAAGGGCTTAAAGGT  
GGCTTAGACTTCTTAAAAGATGATGAGAATATTAATTCTCAACCTTTTATGCGTTGGAAAGAAAGATTCC  
TGTATTCAATGGAAGGTGTAATCGTGCTATTGCTGCTGCTGGCGAAACAAAAGGACATTACTTAAATGT  
AACAGCAGCTACAATGGAAGAGATATATGAAAGAGCTGAGTTTGGTAAACAGCTTGGTAGTATTATTGTC  
ATGATTGACCTTGTAATTGGTTACACAGCTATTCAAACAATGGCTATTTGGGCTCGTAAAAATGATATGA  
TTCTTCATCTACATCGTGCAGGTAACCTCTACTTATTCTCGCCAAAAATCCATGGTATGAATTTCCGAGT  
AATATGTAAATGGATGCGTATGGCAGGTGTAGACCATATTCACGCAGGTACAGTTGTAGGTAAGCTAGAA  
GGTATCCTTTAATGATTCGAGGTTTCTATAATACATTACTTTTACCATATTTAGAAGTGAATTTATCAC  
AAGGTATATTTTTGAACAAGATTGGGCATCTCTTAGAAAAGTTACACCGGTTGCTTCTGGTGGTATTCA  
CTGTGGACAAATGCACCAACTATTAGACTATCTTGGAGATGATGTTGTTCTTCAATTCGGTGGTGGTACT  
ATTGGTCACCCCGATGGTATTCAAGCAGGAGCAACAGCTAATCGTGTAGCTTTAGAATCAATAGTTATAG  
CTCGTAATGAAGGACGTGACTATGTAACAGAAGGACCACAAATTTTGCAAGATGCTGCAA

>PRA\_2

GGTTTTAAAGCTCTTAAAGCTTTAAGACTAGAAGATATGCGTTTACCTGTTGCTTATTTAAAACTTTTC  
AAGGTCCTGCAACTGGCGTAATCTGCGAACGTGAACGTATGGACAAGTTGGCCGTCCATTTTTAGGTGC  
AACTGTTAAACCTAAATTAGGCTTATCAGGCCAAAACCTATGGTCGAGTAGTCTATGAAGGGCTTAAAGGT  
GGCTTAGACTTCTTAAAAGATGATGAGAATATTAATTCTCAACCTTTTATGCGTTGGAAAGAAAGATTCC  
TGTATTCAATGGAAGGTGTAATCGTGCTATTGCTGCTGCTGGCGAAACAAAAGGACATTACTTAAATGT  
AACAGCAGCTACAATGGAAGAGATATATGAAAGAGCTGAGTTTGCTAACAGCTTGGTAGTATTATTGTC  
ATGATTGACCTTGTAATTGGTTACACAGCTATTCAAACAATGGCTATTTGGGCTCGTAAAAATGATATGA  
TTCTTCATCTACATCGTGCAGGTAACCTCTACTTATTCTCGCCAAAAAATCCATGGTATGAATTTCCGAGT  
AATATGTAAATGGATGCGTATGGCAGGTGTAGACCATATTCACGCAGGTACAGTTGTAGGTAAGCTAGAA  
GGTGATCCTTTAATGATTCGAGGTTTCTATAATACATTACTTTTACCATATTTAGAAGTGAATTTATCAC  
AAGGTATATTTTTGAACAAGATTGGGCATCTCTTAGAAAAGTTACACCGGTTGCTTCTGGTGGTATTCA  
CTGTGGACAAATGCACCAACTATTAGACTATCTTGGAGATGATGTTGTTCTTCAATTCGGTGGTGGTACT  
ATTGGTCACCCCGATGGTATTCAAGCAGGAGCAACAGCTAATCGTGTAGCTTTAGAATCAATAGTTATAG  
CTCGTAATGAAGGACGTGACTATGTAACAGAAGGACCACAAATTTTGCAAGATGCTGCAA

>PRA\_9

GGTTTTAAAGCTCTTAAAGCTTTAAGACTAGAAGATATGCGTTTACCTGTTGCTTATTTAAAACTTTTC  
AAGGTCCTGCAACTGGCGTAATCTGCGAACGTGAACGTATGGACAAGTTGGCCGTCCATTTTTAGGTGC  
AACTGTTAAACCTAAATTAGGCTTATCAGGCCAAAACCTATGGTCGAGTAGTCTATGAAGGGCTTAAAGGT  
GGCTTAGACTTCTTAAAAGATGATGAGAATATTAATTCTCAACCTTTTATGCGTTGGAAAGAAAGATTCC  
TGTATTCAATGGAAGGTGTAATCGTGCTATTGCTGCTGCTGGCGAAACAAAAGGACATTACTTAAATGT  
AACAGCAGCTACAATGGAAGAGATATATGAAAGAGCTGAGTTTGCTAACAGCTTGGTAGTATTATTGTC  
ATGATTGACCTTGTAATTGGTTACACAGCTATTCAAACAATGGCTATTTGGGCTCGTAAAAATGATATGA  
TTCTTCATCTACATCGTGCAGGTAACCTCTACTTATTCTCGCCAAAAAATCCATGGTATGAATTTCCGAGT  
AATATGTAAATGGATGCGTATGGCAGGTGTAGACCATATTCACGCAGGTACAGTTGTAGGTAAGCTAGAA  
GGTGATCCTTTAATGATTCGAGGTTTCTATAATACATTACTTTTACCATATTTAGAAGTGAATTTATCAC  
AAGGTATATTTTTGAACAAGATTGGGCATCTCTTAGAAAAGTTACACCGGTTGCTTCTGGTGGTATTCA  
CTGTGGACAAATGCACCAACTATTAGACTATCTTGGAGATGATGTTGTTCTTCAATTCGGTGGTGGTACT  
ATTGGTCACCCCGATGGTATTCAAGCAGGAGCAACAGCTAATCGTGTAGCTTTAGAATCAATAGTTATAG  
CTCGTAATGAAGGACGTGACTATGTAACAGAAGGACCACAAATTTTGCAAGATGCTGCAA

>MAR\_0667

GGTTTTAAAGCTCTTAAAGCTTTAAGACTAGAAGATATGCGTTTACCTGTTGCTTATTTAAAACTTTTC  
AAGGTCCTGCAACTGGCGTAATCTGCGAACGTGAACGTATGGACAAGTTGGCCGTCCATTTTTAGGTGC  
AACTGTTAAACCTAAATTAGGCTTATCAGGCCAAAACCTATGGTCGAGTAGTCTATGAAGGGCTTAAAGGT  
GGCTTAGACTTCTTAAAAGATGATGAGAATATTAATTCTCAACCTTTTATGCGTTGGAAAGAAAGATTCC  
TGTATTCAATGGAAGGTGTAATCGTGCTATTGCTGCTGCTGGCGAAACAAAAGGACATTACTTAAATGT  
AACAGCAGCTACAATGGAAGAGATATATGAAAGAGCTGAGTTTGCTAACAGCTTGGTAGTATTATTGTC  
ATGATTGACCTTGTAATTGGTTACACAGCTATTCAAACAATGGCTATTTGGGCTCGTAAAAATGATATGA  
TTCTTCATCTACATCGTGCAGGTAACCTCTACTTATTCTCGCCAAAAAATCCATGGTATGAATTTCCGAGT  
AATATGTAAATGGATGCGTATGGCAGGTGTAGACCATATTCACGCAGGTACAGTTGTAGGTAAGCTAGAA  
GGTGATCCTTTAATGATTCGAGGTTTCTATAATACATTACTTTTACCATATTTAGAAGTGAATTTATCAC  
AAGGTATATTTTTGAACAAGATTGGGCATCTCTTAGAAAAGTTACACCGGTTGCTTCTGGTGGTATTCA  
CTGTGGACAAATGCACCAACTATTAGACTATCTTGGAGATGATGTTGTTCTTCAATTCGGTGGTGGTACT  
ATTGGTCACCCCGATGGTATTCAAGCAGGAGCAACAGCTAATCGTGTAGCTTTAGAATCAATAGTTATAG  
CTCGTAATGAAGGACGTGACTATGTAACAGAAGGACCACAAATTTTGCAAGATGCTGCAA

>PAR\_0511

GGTTTTAAAGCTCTTAAAGCTTTAAGACTAGAAGATATGCGTTTACCTGTTGCTTATTTAAAACTTTTC  
AAGGTCCTGCAACTGGCGTAATCTGCGAACGTGAACGTATGGACAAGTTGGCCGTCCATTTTTAGGTGC  
AACTGTTAAACCTAAATTAGGCTTATCAGGCCAAAACCTATGGTCGAGTAGTCTATGAAGGGCTTAAAGGT  
GGCTTAGACTTCTTAAAAGATGATGAGAATATTAATTCTCAACCTTTTATGCGTTGGAAAGAAAGATTCC  
TGTATTCAATGGAAGGTGTAATCGTGCTATTGCTGCTGCTGGCGAAACAAAAGGACATTACTTAAATGT



AACAGCAGCTACAATGGAAGAGATATATGAAAGAGCTGAGTTTGCTAAACAGCTTGGTAGTATTATTGTC  
ATGATTGACCTTGAATTGGTTACACAGCTATTCAAACAATGGCTATTTGGGCTCGTAAAAATGATATGA  
TTCTTCATCTACATCGTGCAGGTAACCTCTACTTATTCTCGCCAAAAAATCCATGGTATGAATTTCCGAGT  
AATATGTAAATGGATGCGTATGGCAGGTGTAGACCATATTCACGCAGGTACAGTTGTAGGTAAGCTAGAA  
GGTGATCCTTTAATGATTCGAGGTTTCTATAATACATTACTTTTACCATATTTAGAAGTGAATTTATCAC  
AAGGTATATTTTTTTGAACAAGATTGGGCATCTCTTAGAAAAGTTACACCGGTTGCTTCTGGTGGTATTCA  
CTGTGGACAAATGCACCAACTATTAGACTATCTTGGAGATGATGTTGTTCTTCAATTCGGTGGTGGTACT  
ATTGGTCACCCCGATGGTATTCAAGCAGGAGCAACAGCTAATCGTGTAGCTTTAGAATCAATAGTTATAG  
CTCGTAATGAAGGACGTGACTATGTAACAGAAGGACCACAAATTTTGCAAGATGCTGCAA

>PAR\_0533

GGTTTTAAAGCTCTTAAAGCTTTAAGACTAGAAGATATGCGTTTACCTGTTGCTTATTTAAAACTTTTC  
AAGGTCCTGCAACTGGCGTAATCTGCGAACGTGAACGTATGGACAAGTTTGGCCGTCCATTTTTAGGTGC  
AACTGTTAAACCTAAATTAGGCTTATCAGGCAAAAATATGGTCGAGTAGTCTATGAAGGGCTTAAAGGT  
GGCTTAGACTTCTTAAAAGATGATGAGAATATTAATTCTCAACCTTTTATGCGTTGGAAAGAAAGATTCC  
TGTATTCAATGGAAGGTGTAATCGTGCTATTGCTGCTGCTGGCGAAACAAAAGGACATTACTTAAATGT  
AACAGCAGCTACAATGGAAGAGATATATGAAAGAGCTGAGTTTGCTAAACAGCTTGGTAGTATTATTGTC  
ATGATTGACCTTGAATTGGTTACACAGCTATTCAAACAATGGCTATTTGGGCTCGTAAAAATGATATGA  
TTCTTCATCTACATCGTGCAGGTAACCTCTACTTATTCTCGCCAAAAAATCCATGGTATGAATTTCCGAGT  
AATATGTAAATGGATGCGTATGGCAGGTGTAGACCATATTCACGCAGGTACAGTTGTAGGTAAGCTAGAA  
GGTGATCCTTTAATGATTCGAGGTTTCTATAATACATTACTTTTACCATATTTAGAAGTGAATTTATCAC  
AAGGTATATTTTTTTGAACAAGATTGGGCATCTCTTAGAAAAGTTACACCGGTTGCTTCTGGTGGTATTCA  
CTGTGGACAAATGCACCAACTATTAGACTATCTTGGAGATGATGTTGTTCTTCAATTCGGTGGTGGTACT  
ATTGGTCACCCCGATGGTATTCAAGCAGGAGCAACAGCTAATCGTGTAGCTTTAGAATCAATAGTTATAG  
CTCGTAATGAAGGACGTGACTATGTAACAGAAGGACCACAAATTTTGCAAGATGCTGCAA

>OHI\_0188

GGTTTTAAAGCTCTTAAAGCTTTAAGACTAGAAGATATGCGTTTACCTGTTGCTTATTTAAAACTTTTC  
AAGGTCCTGCAACTGGCGTAATCTGCGAACGTGAACGTATGGACAAGTTTGGCCGTCCATTTTTAGGTGC  
AACTGTTAAACCTAAATTAGGCTTATCAGGCAAAAATATGGTCGAGTAGTCTATGAAGGGCTTAAAGGT  
GGCTTAGACTTCTTAAAAGATGATGAGAATATTAATTCTCAACCTTTTATGCGTTGGAAAGAAAGATTCC  
TGTATTCAATGGAAGGTGTAATCGTGCTATTGCTGCTGCTGGCGAAACAAAAGGACATTACTTAAATGT  
AACAGCAGCTACAATGGAAGAGATATATGAAAGAGCTGAGTTTGCTAAACAGCTTGGTAGTATTATTGTC  
ATGATTGACCTTGAATTGGTTACACAGCTATTCAAACAATGGCTATTTGGGCTCGTAAAAATGATATGA  
TTCTTCATCTACATCGTGCAGGTAACCTCTACTTATTCTCGCCAAAAAATCCATGGTATGAATTTCCGAGT  
AATATGTAAATGGATGCGTATGGCAGGTGTAGACCATATTCACGCAGGTACAGTTGTAGGTAAGCTAGAA  
GGTGATCCTTTAATGATTCGAGGTTTCTATAATACATTACTTTTACCATATTTAGAAGTGAATTTATCAC  
AAGGTATATTTTTTTGAACAAGATTGGGCATCTCTTAGAAAAGTTACACCGGTTGCTTCTGGTGGTATTCA  
CTGTGGACAAATGCACCAACTATTAGACTATCTTGGAGATGATGTTGTTCTTCAATTCGGTGGTGGTACT  
ATTGGTCACCCCGATGGTATTCAAGCAGGAGCAACAGCTAATCGTGTAGCTTTAGAATCAATAGTTATAG  
CTCGTAATGAAGGACGTGACTATGTAACAGAAGGACCACAAATTTTGCAAGATGCTGCAA

>OHI\_0096

GGTTTTAAAGCTCTTAAAGCTTTAAGACTAGAAGATATGCGTTTACCTGTTGCTTATTTAAAACTTTTC  
AAGGTCCTGCAACTGGCGTAATCTGCGAACGTGAACGTATGGACAAGTTTGGCCGTCCATTTTTAGGTGC  
AACTGTTAAACCTAAATTAGGCTTATCAGGCAAAAATATGGTCGAGTAGTCTATGAAGGGCTTAAAGGT  
GGCTTAGACTTCTTAAAAGATGATGAGAATATTAATTCTCAACCTTTTATGCGTTGGAAAGAAAGATTCC  
TGTATTCAATGGAAGGTGTAATCGTGCTATTGCTGCTGCTGGCGAAACAAAAGGACATTACTTAAATGT  
AACAGCAGCTACAATGGAAGAGATATATGAAAGAGCTGAGTTTGCTAAACAGCTTGGTAGTATTATTGTC  
ATGATTGACCTTGAATTGGTTACACAGCTATTCAAACAATGGCTATTTGGGCTCGTAAAAATGATATGA  
TTCTTCATCTACATCGTGCAGGTAACCTCTACTTATTCTCGCCAAAAAATCCATGGTATGAATTTCCGAGT  
AATATGTAAATGGATGCGTATGGCAGGTGTAGACCATATTCACGCAGGTACAGTTGTAGGTAAGCTAGAA  
GGTGATCCTTTAATGATTCGAGGTTTCTATAATACATTACTTTTACCATATTTAGAAGTGAATTTATCAC

AAGGTATATTTTTGAACAAGATTGGGCATCTCTTAGAAAAGTTACACCGGTTGCTTCTGGTGGTATTCA  
CTGTGGACAAATGCACCAACTATTAGACTATCTTGGAGATGATGTTGTTCTTCAATTCGGTGGTGGTACT  
ATTGGTCACCCCGATGGTATTCAAGCAGGAGCAACAGCTAATCGTGTAGCTTTAGAATCAATAGTTATAG  
CTCGTAATGAAGGACGTGACTATGTAACAGAAGGACCACAAATTTTGCAAGATGCTGCAA

>OHI\_0147

GGTTTTAAAGCTCTTAAAGCTTTAAGACTAGAAGATATGCGTTTACCTGTTGCTTATTTAAAACTTTTC  
AAGGTCTGCAACTGGCGTAATCTGCGAACGTGAACGTATGGACAAGTTTGGCCGTCCATTTTTAGGTGC  
AACTGTTAAACCTAAATTAGGCTTATCAGGCAAAAACCTATGGTCGAGTAGTCTATGAAGGGCTTAAAGGT  
GGCTTAGACTTCTTAAAAGATGATGAGAATATTAATTCTCAACCTTTTATGCGTTGGAAAGAAAGATTCC  
TGTATTCAATGGAAGGTGTAATCGTGCTATTGCTGCTGCTGGCGAAACAAAAGGACATTACTTAAATGT  
AACAGCAGCTACAATGGAAGAGATATATGAAAGAGCTGAGTTTGCTAAACAGCTTGGTAGTATTATTGTC  
ATGATTGACCTTGTAATTGGTTACACAGCTATTCAAACAATGGCTATTTGGGCTCGTAAAAATGATATGA  
TTCTTCATCTACATCGTGCAAGTAACTCTACTTATTCTCGCAAAAAATCCATGGTATGAATTTCCGAGT  
AATATGTAAATGGATGCGTATGGCAGGTGTAGACCATATTCACGCAGGTACAGTTGTAGGTAAGCTAGAA  
GGTGATCCTTTAATGATTCGAGGTTTCTATAATACATTACTTTTTACCATATTTAGAAGTGAATTTATCAC  
AAGGTATATTTTTGAACAAGATTGGGCATCTCTTAGAAAAGTTACACCGGTTGCTTCTGGTGGTATTCA  
CTGTGGACAAATGCACCAACTATTAGACTATCTTGGAGATGATGTTGTTCTTCAATTCGGTGGTGGTACT  
ATTGGTCACCCCGATGGTATTCAAGCAGGAGCAACAGCTAATCGTGTAGCTTTAGAATCAATAGTTATAG  
CTCGTAATGAAGGACGTGACTATGTAACAGAAGGACCACAAATTTTGCAAGATGCTGCAA

>OHI\_0095

GGTTTTAAAGCTCTTAAAGCTTTAAGACTAGAAGATATGCGTTTACCTGTTGCTTATTTAAAACTTTTC  
AAGGTCTGCAACTGGCGTAATCTGCGAACGTGAACGTATGGACAAGTTTGGCCGTCCATTTTTAGGTGC  
AACTGTTAAACCTAAATTAGGCTTATCAGGCAAAAACCTATGGTCGAGTAGTCTATGAAGGGCTTAAAGGT  
GGCTTAGACTTCTTAAAAGATGATGAGAATATTAATTCTCAACCTTTTATGCGTTGGAAAGAAAGATTCC  
TGTATTCAATGGAAGGTGTAATCGTGCTATTGCTGCTGCTGGCGAAACAAAAGGACATTACTTAAATGT  
AACAGCAGCTACAATGGAAGAGATATATGAAAGAGCTGAGTTTGCTAAACAGCTTGGTAGTATTATTGTC  
ATGATTGACCTTGTAATTGGTTACACAGCTATTCAAACAATGGCTATTTGGGCTCGTAAAAATGATATGA  
TTCTTCATCTACATCGTGCAAGTAACTCTACTTATTCTCGCAAAAAATCCATGGTATGAATTTCCGAGT  
AATATGTAAATGGATGCGTATGGCAGGTGTAGACCATATTCACGCAGGTACAGTTGTAGGTAAGCTAGAA  
GGTGATCCTTTAATGATTCGAGGTTTCTATAATACATTACTTTTTACCATATTTAGAAGTGAATTTATCAC  
AAGGTATATTTTTGAACAAGATTGGGCATCTCTTAGAAAAGTTACACCGGTTGCTTCTGGTGGTATTCA  
CTGTGGACAAATGCACCAACTATTAGACTATCTTGGAGATGATGTTGTTCTTCAATTCGGTGGTGGTACT  
ATTGGTCACCCCGATGGTATTCAAGCAGGAGCAACAGCTAATCGTGTAGCTTTAGAATCAATAGTTATAG  
CTCGTAATGAAGGACGTGACTATGTAACAGAAGGACCACAAATTTTGCAAGATGCTGCAA
